# Supplementary material
Source: HighWire-hosted journal article supplement (http://gut.bmj.com/highwire/filestream/192786/field_highwire_adjunct_files/0/58121612webonlydata1.xls)
Supplement: 58121612webonlydata1.xls [file 58121612webonlydata1.xls]

## Sheet: Blad1
Probe Set ID	Gene Symbol	Gene Title	Cytoband	RefSeq Transcript ID	Entrez Gene ID	UniGene ID	OMIM ID	Ensembl	SwissProt	Representative Public ID	Pathway	GO biological process term	GO molecular function term	GO cellular component term	GeneChip Array	Annotated by
117_at	HSPA6	heat shock 70kDa protein 6 (HSP70B')	1q23	NM_002155	3310	654614	140555	ENSG00000173110	P17066 /// P48741 /// Q1HBA8 /// Q53FC7	X51757	---	response to stress /// response to unfolded protein /// response to unfolded protein	nucleotide binding /// ATP binding /// ATP binding	---	Human Genome U133 Plus 2.0 Array	Affymetrix NetAffx website
1405_i_at	CCL5	chemokine (C-C motif) ligand 5	17q11.2-q12	NM_002985	6352	514821	187011	ENSG00000161570	P13501 /// Q0QVW8	M21121	---	cellular calcium ion homeostasis /// exocytosis /// cell motility /// chemotaxis /// chemotaxis /// inflammatory response /// inflammatory response /// immune response /// immune response /// cellular defense response /// response to oxidative stress /// cell adhesion /// signal transduction /// cell-cell signaling /// response to virus /// negative regulation of viral genome replication	signal transducer activity /// receptor binding /// cytokine activity /// chemokine activity /// chemokine activity /// chemoattractant activity	extracellular region /// extracellular space	Human Genome U133 Plus 2.0 Array	Affymetrix NetAffx website
1438_at	EPHB3	EPH receptor B3	3q21-qter	NM_004443	2049	2913	601839	ENSG00000182580	P54753	X75208	---	protein amino acid phosphorylation /// signal transduction /// transmembrane receptor protein tyrosine kinase signaling pathway /// axon guidance	nucleotide binding /// protein kinase activity /// protein tyrosine kinase activity /// transmembrane receptor protein tyrosine kinase activity /// transmembrane receptor protein tyrosine kinase activity /// receptor activity /// ephrin receptor activity /// ATP binding /// axon guidance receptor activity /// kinase activity /// transferase activity	integral to plasma membrane /// membrane /// integral to membrane	Human Genome U133 Plus 2.0 Array	Affymetrix NetAffx website
1552257_a_at	TTLL12	tubulin tyrosine ligase-like family, member 12	22q13.31	NM_015140	23170	517670	---	ENSG00000100304	Q14166 /// Q6ZW16 /// Q9BR23	NM_015140	---	protein modification process	tubulin-tyrosine ligase activity	---	Human Genome U133 Plus 2.0 Array	Affymetrix NetAffx website
1552263_at	MAPK1	mitogen-activated protein kinase 1	22q11.2|22q11.21	NM_002745 /// NM_138957	5594	431850	176948	ENSG00000100030	A8CZ64 /// P28482 /// Q1HBJ4 /// Q499G7	NM_138957	<a target="external" href="http://www.wikipathways.org/index.php/Pathway:Homo_sapiens:MAPK_Cascade">MAPK_Cascade</a> /// <a target="external" href="http://www.wikipathways.org/index.php/Pathway:Homo_sapiens:S1P_Signaling">S1P_Signaling</a>	MAPKKK cascade /// protein amino acid phosphorylation /// induction of apoptosis /// chemotaxis /// response to stress /// response to DNA damage stimulus /// cell cycle /// signal transduction /// synaptic transmission /// organ morphogenesis /// cytosine metabolic process /// lipopolysaccharide-mediated signaling pathway /// response to lipopolysaccharide /// response to exogenous dsRNA /// neg…	nucleotide binding /// phosphotyrosine binding /// protein kinase activity /// protein serine/threonine kinase activity /// MAP kinase activity /// MAP kinase activity /// protein binding /// ATP binding /// kinase activity /// transferase activity	nucleus /// cytoplasm	Human Genome U133 Plus 2.0 Array	Affymetrix NetAffx website
1552274_at	PXK	PX domain containing serine/threonine kinase	3p14.3	NM_017771	54899	190544	611450	ENSG00000168297	Q32NE9 /// Q7Z7A4	BC014479	---	protein amino acid phosphorylation /// protein amino acid phosphorylation /// inflammatory response /// cell communication /// regulation of synaptic transmission	nucleotide binding /// actin binding /// protein kinase activity /// protein kinase activity /// protein binding /// ATP binding /// ATP binding /// phosphoinositide binding	cytoplasm /// cytoplasm /// plasma membrane /// plasma membrane /// membrane	Human Genome U133 Plus 2.0 Array	Affymetrix NetAffx website
1552277_a_at	TMEFF1 /// C9orf30	transmembrane protein with EGF-like and two follistatin-like domains 1 /// chromosome 9 open reading frame 30	9q31 /// 9q31.1	NM_003692 /// NM_080655	8577 /// 91283	530272	603421	ENSG00000066697	Q8IYR6 /// Q96H12	NM_080655	---	multicellular organismal development	---	plasma membrane /// membrane /// integral to membrane	Human Genome U133 Plus 2.0 Array	Affymetrix NetAffx website
1552281_at	SLC39A5	solute carrier family 39 (metal ion transporter), member 5	12q13.2	NM_173596	283375	591018	608730	ENSG00000139540	Q6ZMH5	NM_173596	---	transport /// ion transport /// zinc ion transport /// metal ion transport	zinc ion binding /// metal ion transmembrane transporter activity	membrane /// integral to membrane /// basolateral plasma membrane	Human Genome U133 Plus 2.0 Array	Affymetrix NetAffx website
1552291_at	PIGX	phosphatidylinositol glycan anchor biosynthesis, class X	3q29	NM_017861	54965	223296	610276	ENSG00000163964	A8MSL3 /// Q8TBF5	NM_017861	---	GPI anchor biosynthetic process	---	endoplasmic reticulum /// endoplasmic reticulum membrane /// membrane /// integral to membrane	Human Genome U133 Plus 2.0 Array	Affymetrix NetAffx website
1552309_a_at	NEXN	nexilin (F actin binding protein)	1p31.1	NM_144573	91624	632387	---	ENSG00000162614	Q0ZGT2 /// Q5CZ93 /// Q7Z4C7 /// Q86WF6	NM_144573	---	regulation of cell migration /// regulation of cytoskeleton organization and biogenesis	actin binding /// actin filament binding	cytoplasm /// cytoskeleton /// cell-substrate adherens junction /// cell junction	Human Genome U133 Plus 2.0 Array	Affymetrix NetAffx website
1552312_a_at	MFAP3	microfibrillar-associated protein 3	5q32-q33.2	NM_005927	4238	432818	600491	ENSG00000037749	P55082	NM_005927	---	---	extracellular matrix structural constituent	plasma membrane /// membrane /// integral to membrane	Human Genome U133 Plus 2.0 Array	Affymetrix NetAffx website
1552347_at	CRYZL1	crystallin, zeta (quinone reductase)-like 1	21q21.3	NM_145858	9946	352671	603920	ENSG00000205758	A6NHJ8 /// A6NJS9 /// A6NMA8 /// A6NND8 /// A8MZ10 /// O95825 /// Q8TBV9	NM_145311	---	metabolic process	catalytic activity /// NADPH:quinone reductase activity /// binding /// zinc ion binding /// oxidoreductase activity	cytoplasm	Human Genome U133 Plus 2.0 Array	Affymetrix NetAffx website
1552365_at	SCIN	scinderin	7p21.3	NM_001112706 /// NM_033128	85477	655515	---	---	A8K2U8 /// Q8NBV9 /// Q9Y6U3	NM_033128	---	negative regulation of cell proliferation /// calcium ion-dependent exocytosis /// positive regulation of apoptosis /// actin nucleation /// positive regulation of megakaryocyte differentiation /// actin filament severing /// barbed-end actin filament capping /// positive regulation of secretion	phosphatidylserine binding /// actin binding /// actin binding /// actin binding /// calcium ion binding /// calcium ion binding /// calcium ion binding /// phosphatidylinositol binding /// phosphatidylinositol-4,5-bisphosphate binding /// actin filament binding	cytoplasm /// cytoplasm /// cytoskeleton /// cell cortex	Human Genome U133 Plus 2.0 Array	Affymetrix NetAffx website
1552367_a_at	SCIN	scinderin	7p21.3	NM_001112706 /// NM_033128	85477	655515	---	ENSG00000006747	A8K2U8 /// Q75MG0 /// Q8NBV9 /// Q9Y6U3	AF276507	---	negative regulation of cell proliferation /// calcium ion-dependent exocytosis /// positive regulation of apoptosis /// actin nucleation /// positive regulation of megakaryocyte differentiation /// actin filament severing /// barbed-end actin filament capping /// positive regulation of secretion	phosphatidylserine binding /// actin binding /// actin binding /// actin binding /// calcium ion binding /// calcium ion binding /// calcium ion binding /// phosphatidylinositol binding /// phosphatidylinositol-4,5-bisphosphate binding /// actin filament binding	cytoplasm /// cytoplasm /// cytoskeleton /// cell cortex	Human Genome U133 Plus 2.0 Array	Affymetrix NetAffx website
1552370_at	C4orf33	chromosome 4 open reading frame 33	4q28.2	NM_001099783 /// NM_173487	132321	567679	---	ENSG00000151470	Q8N1A6	NM_173487	---	---	---	---	Human Genome U133 Plus 2.0 Array	Affymetrix NetAffx website
1552411_at	DEFB106A /// DEFB106B	defensin, beta 106A /// defensin, beta 106B	8p23.1	NM_001040704 /// NM_152251	245909 /// 503841	511958	---	ENSG00000186579 /// ENSG00000187082	Q8N104	NM_152251	---	defense response /// defense response to bacterium /// defense response to bacterium	---	extracellular region /// extracellular region	Human Genome U133 Plus 2.0 Array	Affymetrix NetAffx website
1552476_s_at	PLCD3	phospholipase C, delta 3	17q21.31	NM_133373	113026	380094	608795	ENSG00000161714	Q8N3E9	NM_133373	---	lipid metabolic process /// signal transduction /// intracellular signaling cascade /// lipid catabolic process	phosphoinositide phospholipase C activity /// phospholipase C activity /// signal transducer activity /// calcium ion binding /// hydrolase activity /// metal ion binding	cytoplasm /// membrane	Human Genome U133 Plus 2.0 Array	Affymetrix NetAffx website
1552477_a_at	IRF6	interferon regulatory factor 6	1q32.3-q41	NM_006147	3664	591415	119300 /// 119500 /// 607199 /// 608864	ENSG00000117595	O14896	BC014852	<a target="external" href="http://www.wikipathways.org/index.php/Pathway:Homo_sapiens:Apoptosis">Apoptosis</a>	transcription /// regulation of transcription, DNA-dependent	DNA binding /// transcription factor activity	nucleus	Human Genome U133 Plus 2.0 Array	Affymetrix NetAffx website
1552478_a_at	IRF6	interferon regulatory factor 6	1q32.3-q41	NM_006147	3664	591415	119300 /// 119500 /// 607199 /// 608864	ENSG00000117595	O14896	NM_006147	<a target="external" href="http://www.wikipathways.org/index.php/Pathway:Homo_sapiens:Apoptosis">Apoptosis</a>	transcription /// regulation of transcription, DNA-dependent	DNA binding /// transcription factor activity	nucleus	Human Genome U133 Plus 2.0 Array	Affymetrix NetAffx website
1552502_s_at	RHBDL2	rhomboid, veinlet-like 2 (Drosophila)	1p34.3	NM_017821	54933	524626	608962	ENSG00000158315	Q9NX52	NM_017821	---	signal transduction	serine-type endopeptidase activity /// peptidase activity /// hydrolase activity	membrane /// integral to membrane	Human Genome U133 Plus 2.0 Array	Affymetrix NetAffx website
1552504_a_at	BRSK1	BR serine/threonine kinase 1	19q13.4	NM_032430	84446	182081	609235	ENSG00000160469	Q8TDC3	NM_032430	---	protein amino acid phosphorylation /// protein amino acid phosphorylation /// response to DNA damage stimulus /// response to UV /// response to ionizing radiation /// establishment of cell polarity /// neuron differentiation /// G2/M transition DNA damage checkpoint	nucleotide binding /// magnesium ion binding /// magnesium ion binding /// protein kinase activity /// protein serine/threonine kinase activity /// protein serine/threonine kinase activity /// ATP binding /// ATP binding /// kinase activity /// transferase activity /// metal ion binding	nucleus /// nucleus /// cytoplasm /// cytoplasm	Human Genome U133 Plus 2.0 Array	Affymetrix NetAffx website
1552519_at	ACVR1C	activin A receptor, type IC	2q24.1	NM_001111031 /// NM_001111032 /// NM_001111033 /// NM_145259	130399	562901	608981	ENSG00000123612	Q53SF5 /// Q8NER5	NM_145259	---	protein amino acid phosphorylation /// protein amino acid phosphorylation /// apoptosis /// cell differentiation /// regulation of apoptosis	nucleotide binding /// magnesium ion binding /// protein kinase activity /// protein serine/threonine kinase activity /// transmembrane receptor protein serine/threonine kinase activity /// receptor activity /// transforming growth factor beta receptor activity /// ATP binding /// ATP binding /// kinase activity /// activin receptor activity, type I /// transferase activity /// manganese ion bind…	membrane /// integral to membrane /// activin receptor complex	Human Genome U133 Plus 2.0 Array	Affymetrix NetAffx website
1552542_s_at	TAGAP	T-cell activation RhoGTPase activating protein	6q25.3	NM_054114 /// NM_138810 /// NM_152133	117289	529984	609667	ENSG00000164691	Q8N103 /// Q96DM2	NM_138810	---	signal transduction	guanyl-nucleotide exchange factor activity	intracellular	Human Genome U133 Plus 2.0 Array	Affymetrix NetAffx website
1552575_a_at	C6orf141	chromosome 6 open reading frame 141	6p12.3	XR_040195 /// XR_040196 /// XR_040197 /// XR_040198 /// XR_040199 /// XR_040200	135398	485528	---	---	A8K1H4 /// Q5SZD1	NM_153344	---	---	---	---	Human Genome U133 Plus 2.0 Array	Affymetrix NetAffx website
1552583_s_at	ABCC13	ATP-binding cassette, sub-family C (CFTR/MRP), member 13	21q11.2	NR_003087 /// NR_003088	150000	366575	608835	ENSG00000215557	Q9NSE7	NM_172025	---	transport	ATP binding /// ATPase activity, coupled to transmembrane movement of substances	nucleus /// membrane /// integral to membrane	Human Genome U133 Plus 2.0 Array	Affymetrix NetAffx website
1552584_at	IL12RB1	interleukin 12 receptor, beta 1	19p13.1	NM_005535 /// NM_153701	3594	567294	209950 /// 601604	ENSG00000096996	A8K308 /// P42701 /// Q8N6Q7	NM_153701	---	signal transduction /// cell surface receptor linked signal transduction /// positive regulation of cell proliferation	receptor activity /// transmembrane receptor activity /// hematopoietin/interferon-class (D200-domain) cytokine receptor activity /// interleukin receptor activity	integral to plasma membrane /// membrane /// integral to membrane	Human Genome U133 Plus 2.0 Array	Affymetrix NetAffx website
1552611_a_at	JAK1	Janus kinase 1 (a protein tyrosine kinase)	1p32.3-p31.3	NM_002227	3716	207538	147795	ENSG00000162434	P23458 /// Q0VGA4 /// Q4LDX3 /// Q59GQ2 /// Q6P669 /// Q8IV82 /// Q9UD26	AL555086	<a target="external" href="http://www.wikipathways.org/index.php/Pathway:Homo_sapiens:TGF_Beta_Signaling_Pathway">TGF_Beta_Signaling_Pathway</a>	protein amino acid phosphorylation /// protein amino acid phosphorylation /// enzyme linked receptor protein signaling pathway /// intracellular signaling cascade /// protein kinase cascade /// peptidyl-tyrosine phosphorylation /// cytokine and chemokine mediated signaling pathway	nucleotide binding /// protein kinase activity /// protein tyrosine kinase activity /// protein tyrosine kinase activity /// non-membrane spanning protein tyrosine kinase activity /// Janus kinase activity /// growth hormone receptor binding /// protein binding /// ATP binding /// kinase activity /// transferase activity	cytoskeleton /// endomembrane system /// membrane	Human Genome U133 Plus 2.0 Array	Affymetrix NetAffx website
1552612_at	CDC42SE2	CDC42 small effector 2	5q31.1	NM_001038702 /// NM_020240	56990	508829	---	ENSG00000158985	Q4KMT9 /// Q9NRR3	NM_020240	---	signal transduction	structural molecule activity /// protein binding /// kinase activity	plasma membrane	Human Genome U133 Plus 2.0 Array	Affymetrix NetAffx website
1552613_s_at	CDC42SE2	CDC42 small effector 2	5q31.1	NM_001038702 /// NM_020240	56990	508829	---	ENSG00000158985	Q4KMT9 /// Q9NRR3	NM_020240	---	signal transduction	structural molecule activity /// protein binding /// kinase activity	plasma membrane	Human Genome U133 Plus 2.0 Array	Affymetrix NetAffx website
1552617_a_at	RFWD2	ring finger and WD repeat domain 2	1q25.1-q25.2	NM_001001740 /// NM_022457	64326	523744	608067	ENSG00000143207	A8MTP5 /// Q05CT6 /// Q504W6 /// Q8NHY2	NM_022457	---	ubiquitin cycle	protein binding /// zinc ion binding /// ligase activity /// metal ion binding	nucleus /// cytoplasm /// nuclear speck	Human Genome U133 Plus 2.0 Array	Affymetrix NetAffx website
1552619_a_at	ANLN	anillin, actin binding protein	7p15-p14	NM_018685	54443	62180	---	ENSG00000011426	A8K5D9 /// A8MUK7 /// Q9NQW6	NM_018685	---	cytokinesis /// septin ring assembly /// cell cycle /// mitosis /// regulation of exit from mitosis /// cell division	actin binding /// actin binding /// actin binding	nucleus /// cytoplasm /// contractile ring /// cytoskeleton /// actin cytoskeleton	Human Genome U133 Plus 2.0 Array	Affymetrix NetAffx website
1552621_at	POLR2J2	DNA directed RNA polymerase II polypeptide J-related	7q22.1	NM_032959	246721	700609	609881	ENSG00000168255	A6NJ25 /// A6NK79 /// B0FP48 /// Q0VGM6 /// Q59FR2 /// Q6P5R8 /// Q6PJD2 /// Q8IZ67 /// Q8TDE6 /// Q9GZM3 /// Q9H1A7	BQ613856	<a target="external" href="http://www.wikipathways.org/index.php/Pathway:Homo_sapiens:RNA_transcription_Reactome">RNA_transcription_Reactome</a>	transcription	DNA binding /// DNA-directed RNA polymerase activity /// protein dimerization activity	nucleus	Human Genome U133 Plus 2.0 Array	Affymetrix NetAffx website
1552626_a_at	TMEM163	transmembrane protein 163	2q21.3	NM_030923	81615	369471	---	ENSG00000152128	Q8TC26 /// Q9H2N0	NM_030923	---	---	---	membrane /// integral to membrane	Human Genome U133 Plus 2.0 Array	Affymetrix NetAffx website
1552628_a_at	HERPUD2	HERPUD family member 2	7p14.2	NM_022373	64224	599851	---	ENSG00000122557	A4D1Y8 /// Q9BSE4	NM_022373	---	protein modification process /// response to unfolded protein	---	membrane /// integral to membrane	Human Genome U133 Plus 2.0 Array	Affymetrix NetAffx website
1552648_a_at	TNFRSF10A	tumor necrosis factor receptor superfamily, member 10a	8p21	NM_003844	8797	591834	603611	ENSG00000104689	A8K5I4 /// O00220 /// Q53Y72	NM_003844	---	apoptosis /// induction of apoptosis /// caspase activation /// signal transduction /// signal transduction /// activation of NF-kappaB-inducing kinase activity /// induction of apoptosis via death domain receptors /// induction of apoptosis via death domain receptors	receptor activity /// receptor activity /// death receptor activity /// protein binding /// caspase activator activity /// TRAIL binding	membrane /// integral to membrane /// integral to membrane	Human Genome U133 Plus 2.0 Array	Affymetrix NetAffx website
1552695_a_at	SLC2A13	solute carrier family 2 (facilitated glucose transporter), member 13	12q12	NM_052885	114134	558595	611036	ENSG00000151229	Q86X07 /// Q96QE2	NM_052885	---	transport /// carbohydrate transport	transporter activity /// sugar:hydrogen symporter activity	membrane /// integral to membrane	Human Genome U133 Plus 2.0 Array	Affymetrix NetAffx website
1552703_s_at	CASP1 /// COP1	caspase 1, apoptosis-related cysteine peptidase (interleukin 1, beta, convertase) /// caspase-1 dominant-negative inhibitor pseudo-ICE	11q23	NM_001017534 /// NM_001223 /// NM_033292 /// NM_033293 /// NM_033294 /// NM_033295 /// NM_052889	114769 /// 834	348365	147678	ENSG00000137752 /// ENSG00000204397	A8K249 /// A8K257 /// P29466 /// Q5EG05 /// Q5FBZ0 /// Q5XLA6 /// Q96RJ9	NM_052889	<a target="external" href="http://www.wikipathways.org/index.php/Pathway:Homo_sapiens:Apoptosis">Apoptosis</a> /// <a target="external" href="http://www.wikipathways.org/index.php/Pathway:Homo_sapiens:Apoptosis_KEGG">Apoptosis_KEGG</a>	proteolysis /// proteolysis /// proteolysis /// apoptosis /// apoptosis /// signal transduction /// regulation of apoptosis /// positive regulation of I-kappaB kinase/NF-kappaB cascade	signal transducer activity /// protein binding /// protein binding /// peptidase activity /// cysteine-type peptidase activity /// caspase activator activity /// hydrolase activity /// caspase activity /// caspase activity	intracellular /// cytoplasm	Human Genome U133 Plus 2.0 Array	Affymetrix NetAffx website
1552790_a_at	SEC62	SEC62 homolog (S. cerevisiae)	3q26.2	NM_003262	7095	592561	602173	ENSG00000008952	A0JLN5 /// Q3KR08 /// Q96M58 /// Q99442	NM_153039	---	cotranslational protein targeting to membrane /// transport /// protein transport /// intracellular protein transport across a membrane	receptor activity /// protein transporter activity	endoplasmic reticulum /// endoplasmic reticulum /// endoplasmic reticulum membrane /// membrane /// integral to membrane /// integral to membrane	Human Genome U133 Plus 2.0 Array	Affymetrix NetAffx website
1552797_s_at	PROM2	prominin 2	2q11.1	NM_144707	150696	469313	---	ENSG00000155066	Q8N271	NM_144707	---	---	---	cilium /// membrane /// integral to membrane /// basolateral plasma membrane /// apical plasma membrane	Human Genome U133 Plus 2.0 Array	Affymetrix NetAffx website
1552798_a_at	TLR4	toll-like receptor 4	9q32-q33	NM_138554	7099	174312	114500 /// 152430 /// 603030 /// 611488	ENSG00000136869	A8K1Y8 /// O00206 /// Q5VZI8 /// Q5VZI9	NM_138557	---	inflammatory response /// immune response /// signal transduction /// signal transduction /// detection of fungus /// T-helper 1 type immune response /// macrophage activation /// positive regulation of tumor necrosis factor biosynthetic process /// positive regulation of interleukin-12 biosynthetic process /// positive regulation of interleukin-12 biosynthetic process /// innate immune response …	lipopolysaccharide binding /// receptor activity /// transmembrane receptor activity /// transmembrane receptor activity /// protein binding /// protein binding	integral to plasma membrane /// membrane /// integral to membrane /// intrinsic to membrane /// lipopolysaccharide receptor complex /// perinuclear region of cytoplasm	Human Genome U133 Plus 2.0 Array	Affymetrix NetAffx website
1552807_a_at	SIGLEC10	sialic acid binding Ig-like lectin 10	19q13.3	NM_033130	89790	284813	606091	ENSG00000142512	A8K1I5 /// A8K3C7 /// Q96LC7	AF301007	---	cell adhesion	protein binding /// sugar binding	extracellular region /// plasma membrane /// membrane /// integral to membrane	Human Genome U133 Plus 2.0 Array	Affymetrix NetAffx website
1552833_at	B3GNT6	UDP-GlcNAc:betaGal beta-1,3-N-acetylglucosaminyltransferase 6 (core 3 synthase)	11q13.4	NM_138706	192134	352622	---	ENSG00000198488	A8K9Q8 /// Q6ZMB0	NM_138706	---	protein amino acid glycosylation /// glycoprotein biosynthetic process /// O-glycan processing, core 3	galactosyltransferase activity /// galactosyltransferase activity /// transferase activity /// transferase activity, transferring glycosyl groups /// beta-1,3-galactosyl-O-glycosyl-glycoprotein beta-1,3-N-acetylglucosaminyltransferase activity	Golgi membrane /// Golgi apparatus /// membrane /// membrane /// integral to membrane	Human Genome U133 Plus 2.0 Array	Affymetrix NetAffx website
1552834_at	B3GNT6	UDP-GlcNAc:betaGal beta-1,3-N-acetylglucosaminyltransferase 6 (core 3 synthase)	11q13.4	NM_138706	192134	352622	---	ENSG00000198488	A8K9Q8 /// Q6ZMB0	BC025357	---	protein amino acid glycosylation /// glycoprotein biosynthetic process /// O-glycan processing, core 3	galactosyltransferase activity /// galactosyltransferase activity /// transferase activity /// transferase activity, transferring glycosyl groups /// beta-1,3-galactosyl-O-glycosyl-glycoprotein beta-1,3-N-acetylglucosaminyltransferase activity	Golgi membrane /// Golgi apparatus /// membrane /// membrane /// integral to membrane	Human Genome U133 Plus 2.0 Array	Affymetrix NetAffx website
1552863_a_at	CACNG6	calcium channel, voltage-dependent, gamma subunit 6	19q13.4	NM_031897 /// NM_145814 /// NM_145815	59285	631560	606898	ENSG00000130433	A6NFR2 /// A6NP74 /// Q9BXT2	NM_145815	---	transport /// ion transport /// calcium ion transport /// calcium ion transport	structural molecule activity /// ion channel activity /// voltage-gated ion channel activity /// voltage-gated calcium channel activity /// calcium channel activity /// calcium ion binding	voltage-gated calcium channel complex /// tight junction /// membrane /// integral to membrane	Human Genome U133 Plus 2.0 Array	Affymetrix NetAffx website
1552870_s_at	C1orf125	chromosome 1 open reading frame 125	1q25.2	NM_144696 /// NM_182766	126859	658505	---	ENSG00000162779	A6H900 /// A6NHH4 /// Q5T1B0 /// Q8NDG7	NM_144696	---	---	---	---	Human Genome U133 Plus 2.0 Array	Affymetrix NetAffx website
1552931_a_at	PDE8A	phosphodiesterase 8A	15q25.3	NM_002605 /// NM_173454	5151	9333	602972	ENSG00000073417	O60658 /// Q6P9H3 /// Q86XV4 /// Q96T71 /// Q9UMB5	NM_002605	<a target="external" href="http://www.wikipathways.org/index.php/Pathway:Homo_sapiens:G_Protein_Signaling">G_Protein_Signaling</a>	two-component signal transduction system (phosphorelay) /// regulation of transcription, DNA-dependent /// signal transduction /// cyclic nucleotide metabolic process	two-component response regulator activity /// magnesium ion binding /// catalytic activity /// 3',5'-cyclic-nucleotide phosphodiesterase activity /// 3',5'-cyclic-nucleotide phosphodiesterase activity /// signal transducer activity /// hydrolase activity /// manganese ion binding /// metal ion binding	---	Human Genome U133 Plus 2.0 Array	Affymetrix NetAffx website
1552977_a_at	CNPY3	canopy 3 homolog (zebrafish)	6pter-p12.1	NM_006586	10695	414099	610774	ENSG00000137161	Q9BT09	NM_006586	---	---	---	extracellular region	Human Genome U133 Plus 2.0 Array	Affymetrix NetAffx website
1552978_a_at	SCAMP1	secretory carrier membrane protein 1	5q13.3-q14.1	NM_004866	9522	482587	606911	ENSG00000085365	A8K2G0 /// O15126 /// Q6FG23 /// Q96AZ4	NM_052822	---	transport /// post-Golgi vesicle-mediated transport /// protein transport	---	membrane fraction /// membrane /// integral to membrane	Human Genome U133 Plus 2.0 Array	Affymetrix NetAffx website
1553043_a_at	CD300LF	CD300 molecule-like family member f	17q25.1	NM_139018	146722	567706	609807	ENSG00000186074	Q8TDQ1	NM_139018	---	immune response	receptor activity	plasma membrane /// membrane /// integral to membrane	Human Genome U133 Plus 2.0 Array	Affymetrix NetAffx website
1553047_at	PIP4K2B	phosphatidylinositol-5-phosphate 4-kinase, type II, beta	17q12	NM_003559	8396	260603	603261	---	P78356	NM_138687	---	cell surface receptor linked signal transduction /// phosphatidylinositol metabolic process	nucleotide binding /// receptor signaling protein activity /// ATP binding /// kinase activity /// phosphatidylinositol phosphate kinase activity /// 1-phosphatidylinositol-4-phosphate 5-kinase activity /// 1-phosphatidylinositol-5-phosphate 4-kinase activity /// transferase activity	cytoplasm /// endoplasmic reticulum /// endoplasmic reticulum membrane /// plasma membrane /// membrane	Human Genome U133 Plus 2.0 Array	Affymetrix NetAffx website
1553079_at	TRIM40	tripartite motif-containing 40	6p21.33	NM_138700	135644	509439	---	ENSG00000172524 /// ENSG00000204614 /// ENSG00000206425	A2BEC5 /// A2BEC6 /// Q5SRJ6 /// Q5SS36 /// Q6P9F5	NM_138700	---	---	protein binding /// zinc ion binding /// metal ion binding	intracellular	Human Genome U133 Plus 2.0 Array	Affymetrix NetAffx website
1553081_at	WFDC12	WAP four-disulfide core domain 12	20q12-q13.1	NM_080869	128488	352180	609872	ENSG00000168703	Q8WWY7	NM_080869	---	defense response to bacterium /// defense response to bacterium	endopeptidase inhibitor activity /// serine-type endopeptidase inhibitor activity /// serine-type endopeptidase inhibitor activity /// protease inhibitor activity	extracellular region /// extracellular space	Human Genome U133 Plus 2.0 Array	Affymetrix NetAffx website
1553096_s_at	BCL2L11	BCL2-like 11 (apoptosis facilitator)	2q13	NM_006538 /// NM_138621 /// NM_207002	10018	469658	603827	ENSG00000153094	A8K2W2 /// O43521 /// Q0MSE7 /// Q0MSE8 /// Q0MSE9 /// Q53R28 /// Q6JTU4 /// Q6JTU6 /// Q6T851 /// Q6TE14 /// Q6TE15 /// Q6TE16 /// Q6V402 /// Q8WYL6 /// Q8WYL7 /// Q8WYL8 /// Q8WYL9 /// Q8WYM0 /// Q8WYM1	NM_138627	<a target="external" href="http://www.wikipathways.org/index.php/Pathway:Homo_sapiens:Apoptosis">Apoptosis</a>	apoptosis /// induction of apoptosis /// positive regulation of apoptosis	protein binding	membrane fraction /// membrane	Human Genome U133 Plus 2.0 Array	Affymetrix NetAffx website
1553101_a_at	ALKBH5	alkB, alkylation repair homolog 5 (E. coli)	17p11.2	NM_017758	54890	462392	---	ENSG00000091542	Q6P6C2	NM_017758	---	---	---	membrane /// integral to membrane	Human Genome U133 Plus 2.0 Array	Affymetrix NetAffx website
1553102_a_at	CCDC69	coiled-coil domain containing 69	5q33.1	NM_015621	26112	655336	---	ENSG00000198624	A6NI79 /// Q6QIX4 /// Q9H8E5 /// Q9Y4P0	BC016647	---	---	---	---	Human Genome U133 Plus 2.0 Array	Affymetrix NetAffx website
1553103_at	NFX1	nuclear transcription factor, X-box binding 1	9p13.3	NM_002504 /// NM_147133 /// NM_147134	4799	413074	603255	ENSG00000086102	A0JLR2 /// A8K6H8 /// O43831 /// Q12986 /// Q5VXW6 /// Q96EL5 /// Q9BXI1	NM_147134	---	negative regulation of transcription from RNA polymerase II promoter /// negative regulation of transcription from RNA polymerase II promoter /// transcription /// regulation of transcription, DNA-dependent /// transcription from RNA polymerase II promoter /// ubiquitin cycle /// inflammatory response /// negative regulation of MHC class II biosynthetic process	nucleic acid binding /// DNA binding /// transcription factor activity /// transcription factor activity /// protein binding /// zinc ion binding /// ligase activity /// metal ion binding	nucleus	Human Genome U133 Plus 2.0 Array	Affymetrix NetAffx website
1553105_s_at	DSG2	desmoglein 2	18q12.1	NM_001943	1829	412597	125671 /// 610193	ENSG00000046604	Q14126	NM_001943	---	cell adhesion /// homophilic cell adhesion	calcium ion binding /// protein binding	plasma membrane /// intercellular junction /// membrane /// integral to membrane /// cell junction /// desmosome	Human Genome U133 Plus 2.0 Array	Affymetrix NetAffx website
1553107_s_at	C5orf24	chromosome 5 open reading frame 24	5q31.1	NM_152409	134553	406549	---	ENSG00000181904	Q7Z6I8	BF436799	---	---	---	---	Human Genome U133 Plus 2.0 Array	Affymetrix NetAffx website
1553112_s_at	CDK8	cyclin-dependent kinase 8	13q12	NM_001260	1024	382306	603184	ENSG00000132964	P49336 /// Q64FY6	NM_001260	---	transcription /// regulation of transcription, DNA-dependent /// protein amino acid phosphorylation	nucleotide binding /// protein kinase activity /// protein kinase activity /// protein serine/threonine kinase activity /// cyclin-dependent protein kinase activity /// protein binding /// ATP binding /// RNA polymerase subunit kinase activity /// kinase activity /// transferase activity	mediator complex /// nucleus /// nucleus	Human Genome U133 Plus 2.0 Array	Affymetrix NetAffx website
1553113_s_at	CDK8	cyclin-dependent kinase 8	13q12	NM_001260	1024	382306	603184	---	P49336 /// Q64FY6	BF700678	---	transcription /// regulation of transcription, DNA-dependent /// protein amino acid phosphorylation	nucleotide binding /// protein kinase activity /// protein kinase activity /// protein serine/threonine kinase activity /// cyclin-dependent protein kinase activity /// protein binding /// ATP binding /// RNA polymerase subunit kinase activity /// kinase activity /// transferase activity	mediator complex /// nucleus /// nucleus	Human Genome U133 Plus 2.0 Array	Affymetrix NetAffx website
1553114_a_at	PTK6	PTK6 protein tyrosine kinase 6	20q13.3	NM_005975	5753	51133	602004	ENSG00000101213	Q13882	NM_005975	---	protein amino acid phosphorylation /// protein amino acid phosphorylation	nucleotide binding /// protein kinase activity /// protein serine/threonine kinase activity /// protein tyrosine kinase activity /// non-membrane spanning protein tyrosine kinase activity /// non-membrane spanning protein tyrosine kinase activity /// protein binding /// ATP binding /// kinase activity /// transferase activity	nucleus /// cytoplasm	Human Genome U133 Plus 2.0 Array	Affymetrix NetAffx website
1553117_a_at	STK38	serine/threonine kinase 38	6p21	NM_007271	11329	409578	606964	ENSG00000112079	Q15208 /// Q9UPD3 /// Q9UPD4	NM_007271	---	protein modification process /// protein amino acid phosphorylation /// protein amino acid phosphorylation /// protein kinase cascade	nucleotide binding /// magnesium ion binding /// magnesium ion binding /// protein kinase activity /// protein serine/threonine kinase activity /// protein serine/threonine kinase activity /// protein binding /// ATP binding /// ATP binding /// kinase activity /// transferase activity /// metal ion binding	nucleus /// nucleus /// cytoplasm	Human Genome U133 Plus 2.0 Array	Affymetrix NetAffx website
1553132_a_at	TC2N	tandem C2 domains, nuclear	14q32.12	NM_152332	123036	510262	---	ENSG00000165929	Q8N9U0	NM_152332	---	---	---	nucleus	Human Genome U133 Plus 2.0 Array	Affymetrix NetAffx website
1553153_at	ATP6V0D2	ATPase, H+ transporting, lysosomal 38kDa, V0 subunit d2	---	NM_152565	245972	436360	---	ENSG00000147614	Q8N8Y2	NM_152565	---	transport /// ion transport /// proton transport	hydrogen ion transmembrane transporter activity /// hydrolase activity /// hydrogen ion transporting ATPase activity, rotational mechanism	proton-transporting two-sector ATPase complex	Human Genome U133 Plus 2.0 Array	Affymetrix NetAffx website
1553185_at	RASEF	RAS and EF-hand domain containing	9q21.32	NM_152573	158158	657750	611344	---	A8K4M1 /// Q8IZ41	NM_152573	---	cell adhesion /// small GTPase mediated signal transduction /// protein transport	nucleotide binding /// structural molecule activity /// calcium ion binding /// GTP binding	cytoplasm /// actin cytoskeleton	Human Genome U133 Plus 2.0 Array	Affymetrix NetAffx website
1553186_x_at	RASEF	RAS and EF-hand domain containing	9q21.32	NM_152573	158158	657750	611344	---	A8K4M1 /// Q8IZ41	NM_152573	---	cell adhesion /// small GTPase mediated signal transduction /// protein transport	nucleotide binding /// structural molecule activity /// calcium ion binding /// GTP binding	cytoplasm /// actin cytoskeleton	Human Genome U133 Plus 2.0 Array	Affymetrix NetAffx website
1553212_at	KRT78	keratin 78	12q13.13	NM_173352	196374	665267	611159	ENSG00000170423	A8K4D6 /// Q8N1N4	NM_173352	---	---	structural molecule activity /// protein binding	intermediate filament	Human Genome U133 Plus 2.0 Array	Affymetrix NetAffx website
1553296_at	GPR128	G protein-coupled receptor 128	3q12.2	NM_032787	84873	334511	---	ENSG00000144820	A1L441 /// Q14D94 /// Q6ZMH0 /// Q6ZMH4 /// Q96K78	NM_032787	---	signal transduction /// G-protein coupled receptor protein signaling pathway /// G-protein coupled receptor protein signaling pathway /// neuropeptide signaling pathway	signal transducer activity /// receptor activity /// G-protein coupled receptor activity /// G-protein coupled receptor activity	plasma membrane /// membrane /// integral to membrane /// integral to membrane	Human Genome U133 Plus 2.0 Array	Affymetrix NetAffx website
1553297_a_at	CSF3R	colony stimulating factor 3 receptor (granulocyte)	1p35-p34.3	NM_000760 /// NM_156038 /// NM_156039 /// NM_172313	1441	524517	138971	ENSG00000119535	Q1ZYL6 /// Q59F05 /// Q99062	NM_172313	---	defense response /// cell adhesion /// signal transduction	receptor activity /// receptor activity /// hematopoietin/interferon-class (D200-domain) cytokine receptor activity /// protein binding	extracellular region /// plasma membrane /// integral to plasma membrane /// membrane /// integral to membrane	Human Genome U133 Plus 2.0 Array	Affymetrix NetAffx website
1553396_a_at	CCDC13	coiled-coil domain containing 13	3p22.1	NM_144719	152206	709716	---	ENSG00000173811	Q8IYE1 /// Q96LI1	NM_144719	---	---	---	---	Human Genome U133 Plus 2.0 Array	Affymetrix NetAffx website
1553530_a_at	ITGB1	integrin, beta 1 (fibronectin receptor, beta polypeptide, antigen CD29 includes MDF2, MSK12)	10p11.2	NM_002211 /// NM_033666 /// NM_033667 /// NM_033668 /// NM_033669 /// NM_133376	3688	695946	135630	ENSG00000150093	A8K6N2 /// P05556 /// Q29RW2 /// Q5T3E4 /// Q5T3E5 /// Q5T3E6 /// Q7Z3V1 /// Q8WUM6	NM_033669	<a target="external" href="http://www.wikipathways.org/index.php/Pathway:Homo_sapiens:Integrin-mediated_cell_adhesion_KEGG">Integrin-mediated_cell_adhesion_KEGG</a>	cellular defense response /// cell adhesion /// homophilic cell adhesion /// cell-matrix adhesion /// integrin-mediated signaling pathway /// multicellular organismal development /// cell migration	receptor activity /// binding /// protein binding /// protein binding /// identical protein binding /// protein heterodimerization activity	ruffle /// endoplasmic reticulum /// plasma membrane /// integrin complex /// integrin complex /// membrane /// integral to membrane /// neuromuscular junction /// sarcolemma /// melanosome	Human Genome U133 Plus 2.0 Array	Affymetrix NetAffx website
1553542_at	CCDC125	coiled-coil domain containing 125	5q13.2	NM_176816	202243	654850	---	ENSG00000183323	A8MQ34 /// Q2HJ12 /// Q86Z20	NM_176816	---	---	---	---	Human Genome U133 Plus 2.0 Array	Affymetrix NetAffx website
1553575_at	ND6	NADH dehydrogenase, subunit 6 (complex I)	---	---	4541	---	---	ENSG00000198695 /// ENSG00000212869	A0S9S4 /// A1DUW2 /// A1DVF7 /// A1DVP8 /// A4ZMD8 /// P03923 /// Q0G8P9 /// Q0ZEY1 /// Q20CU2 /// Q2HLE2 /// Q305R6 /// Q305V5 /// Q305Y1 /// Q4EWR6 /// Q4F0B4 /// Q4F0F3 /// Q4F290 /// Q4F3Y8 /// Q4F4M2 /// Q4F4P8 /// Q4F694 /// Q4G7B0 /// Q4GE26 /// Q4GIS7 /// Q4GLZ5 /// Q4GN61 /// Q4GQW0 /// Q4GSE3 /// Q4ZEJ2 /// Q541N0 /// Q5S9S1 /// Q5XRI0 /// Q5XRX3 /// Q6RMK3 /// Q6RR68 /// Q6RRL4 /// Q6R…	NM_173714	<a target="external" href="http://www.wikipathways.org/index.php/Pathway:Homo_sapiens:Electron_Transport_Chain">Electron_Transport_Chain</a>	mitochondrial electron transport, NADH to ubiquinone /// mitochondrial electron transport, NADH to ubiquinone /// transport /// oxidation reduction	NADH dehydrogenase (ubiquinone) activity /// NADH dehydrogenase (ubiquinone) activity /// oxidoreductase activity	mitochondrion /// mitochondrial respiratory chain /// mitochondrial respiratory chain complex I	Human Genome U133 Plus 2.0 Array	Affymetrix NetAffx website
1553589_a_at	PDZK1IP1	PDZK1 interacting protein 1	1p33	NM_005764	10158	431099	607178	ENSG00000162366	Q13113 /// Q6ICT9	NM_005764	---	---	---	extracellular region /// membrane /// integral to membrane	Human Genome U133 Plus 2.0 Array	Affymetrix NetAffx website
1553639_a_at	PPARGC1B	peroxisome proliferator-activated receptor gamma, coactivator 1 beta	5q33.1	NM_133263	133522	591261	601665 /// 608886	ENSG00000155846	A2RUM8 /// A2RUN0 /// Q86YN6 /// Q8TAL0	NM_133263	---	transcription /// regulation of transcription, DNA-dependent /// estrogen receptor signaling pathway /// estrogen receptor signaling pathway /// positive regulation of transcription from RNA polymerase II promoter /// positive regulation of transcription from RNA polymerase II promoter	nucleotide binding /// nucleic acid binding /// RNA binding /// RNA binding /// receptor activity /// RNA polymerase II transcription mediator activity /// estrogen receptor binding /// ligand-dependent nuclear receptor transcription coactivator activity /// ligand-dependent nuclear receptor transcription coactivator activity /// receptor activator activity /// AF-2 domain binding /// AF-2 domain…	mediator complex /// nucleus /// nucleus /// nucleus	Human Genome U133 Plus 2.0 Array	Affymetrix NetAffx website
1553647_at	CDYL2	chromodomain protein, Y-like 2	16q23.2	NM_152342	124359	373908	---	ENSG00000166446	Q7Z5I8 /// Q8N8U2	NM_152342	---	chromatin assembly or disassembly /// metabolic process	chromatin binding /// catalytic activity	chromatin /// nucleus	Human Genome U133 Plus 2.0 Array	Affymetrix NetAffx website
1553677_a_at	TIPRL	TIP41, TOR signaling pathway regulator-like (S. cerevisiae)	1q23.2	NM_001031800 /// NM_152902	261726	209431	611807	ENSG00000143155	O75663	NM_152902	---	---	protein binding	---	Human Genome U133 Plus 2.0 Array	Affymetrix NetAffx website
1553678_a_at	ITGB1	integrin, beta 1 (fibronectin receptor, beta polypeptide, antigen CD29 includes MDF2, MSK12)	10p11.2	NM_002211 /// NM_033666 /// NM_033667 /// NM_033668 /// NM_033669 /// NM_133376	3688	695946	135630	ENSG00000150093	A8K6N2 /// P05556 /// Q29RW2 /// Q5T3E4 /// Q5T3E5 /// Q5T3E6 /// Q7Z3V1 /// Q8WUM6	NM_133376	<a target="external" href="http://www.wikipathways.org/index.php/Pathway:Homo_sapiens:Integrin-mediated_cell_adhesion_KEGG">Integrin-mediated_cell_adhesion_KEGG</a>	cellular defense response /// cell adhesion /// homophilic cell adhesion /// cell-matrix adhesion /// integrin-mediated signaling pathway /// multicellular organismal development /// cell migration	receptor activity /// binding /// protein binding /// protein binding /// identical protein binding /// protein heterodimerization activity	ruffle /// endoplasmic reticulum /// plasma membrane /// integrin complex /// integrin complex /// membrane /// integral to membrane /// neuromuscular junction /// sarcolemma /// melanosome	Human Genome U133 Plus 2.0 Array	Affymetrix NetAffx website
1553681_a_at	PRF1	perforin 1 (pore forming protein)	10q22	NM_001083116 /// NM_005041	5551	2200	170280 /// 603553 /// 605027	ENSG00000180644	P14222	NM_005041	<a target="external" href="http://www.wikipathways.org/index.php/Pathway:Homo_sapiens:Apoptosis">Apoptosis</a> /// <a target="external" href="http://www.wikipathways.org/index.php/Pathway:Homo_sapiens:Apoptosis_GenMAPP">Apoptosis_GenMAPP</a>	apoptosis /// virus-infected cell apoptosis /// transformed cell apoptosis /// cellular defense response /// circadian rhythm /// pathogenesis /// cytolysis /// hemolysis by symbiont of host red blood cells /// response to ethanol	calcium ion binding	cytosol /// membrane /// integral to membrane /// cytoplasmic membrane-bounded vesicle	Human Genome U133 Plus 2.0 Array	Affymetrix NetAffx website
1553685_s_at	SP1	Sp1 transcription factor	12q13.1	NM_138473	6667	649191	189906	ENSG00000185591	P08047 /// Q59EY3 /// Q96ER4 /// Q9NR52	NM_138473	<a target="external" href="http://www.wikipathways.org/index.php/Pathway:Homo_sapiens:Smooth_muscle_contraction">Smooth_muscle_contraction</a>	transcription /// regulation of transcription, DNA-dependent /// regulation of transcription, DNA-dependent /// regulation of transcription from RNA polymerase II promoter /// positive regulation of transcription from RNA polymerase II promoter, global /// positive regulation of transcription, DNA-dependent /// positive regulation of transcription, DNA-dependent	nucleic acid binding /// DNA binding /// DNA binding /// double-stranded DNA binding /// transcription factor activity /// transcription factor activity /// RNA polymerase II transcription factor activity /// protein binding /// protein binding /// protein C-terminus binding /// zinc ion binding /// transcription activator activity /// identical protein binding /// protein homodimerization activi…	intracellular /// nucleus /// nucleus	Human Genome U133 Plus 2.0 Array	Affymetrix NetAffx website
1553694_a_at	PIK3C2A	phosphoinositide-3-kinase, class 2, alpha polypeptide	11p15.5-p14	NM_002645	5286	175343	603601	ENSG00000011405	O00443	NM_002645	---	phosphatidylinositol biosynthetic process /// cell communication /// phosphoinositide phosphorylation /// phosphoinositide-mediated signaling	inositol or phosphatidylinositol kinase activity /// binding /// protein binding /// kinase activity /// 1-phosphatidylinositol-3-kinase activity /// 1-phosphatidylinositol-3-kinase activity /// transferase activity /// phosphotransferase activity, alcohol group as acceptor /// phosphatidylinositol-4-phosphate 3-kinase activity /// phosphoinositide binding	nucleus /// cytoplasm /// Golgi apparatus /// plasma membrane /// phosphoinositide 3-kinase complex /// membrane /// cytoplasmic vesicle	Human Genome U133 Plus 2.0 Array	Affymetrix NetAffx website
1553715_s_at	C16orf14	chromosome 16 open reading frame 14	16p13.3	NM_138418	84331	417710	---	ENSG00000172366	Q96J99 /// Q9BUT9	NM_032371	---	---	---	---	Human Genome U133 Plus 2.0 Array	Affymetrix NetAffx website
1553718_at	ZNF548	zinc finger protein 548	19q13.43	NM_152909	147694	657353	---	ENSG00000188785	Q8NEK5	NM_152909	---	transcription /// regulation of transcription, DNA-dependent	nucleic acid binding /// DNA binding /// zinc ion binding /// metal ion binding	intracellular /// nucleus	Human Genome U133 Plus 2.0 Array	Affymetrix NetAffx website
1553723_at	GPR97	G protein-coupled receptor 97	16q13	NM_170776	222487	383403	---	ENSG00000182885	Q86Y34 /// Q8IXE4	NM_170776	---	signal transduction /// G-protein coupled receptor protein signaling pathway /// neuropeptide signaling pathway	signal transducer activity /// receptor activity /// G-protein coupled receptor activity	plasma membrane /// membrane /// integral to membrane /// integral to membrane	Human Genome U133 Plus 2.0 Array	Affymetrix NetAffx website
1553725_s_at	ZNF644	zinc finger protein 644	1p22.2	NM_016620 /// NM_032186 /// NM_201269	84146	173001	---	ENSG00000122482	A2RU71 /// A7E234 /// Q2TAM0 /// Q569I6 /// Q8NEI6 /// Q9H582 /// Q9H835 /// Q9H8J8 /// Q9NVH8 /// Q9NZF0	NM_016620	---	transcription /// regulation of transcription, DNA-dependent	nucleic acid binding /// DNA binding /// zinc ion binding /// metal ion binding	intracellular /// nucleus	Human Genome U133 Plus 2.0 Array	Affymetrix NetAffx website
1553728_at	LRRC43	leucine rich repeat containing 43	12q24.31	NM_001098519 /// NM_152759	254050	374856	---	ENSG00000158113	Q8N309	NM_152759	---	---	protein binding	---	Human Genome U133 Plus 2.0 Array	Affymetrix NetAffx website
1553749_at	FAM76B	family with sequence similarity 76, member B	11q21	NM_144664	143684	288304	---	---	Q5HYJ3	NM_144664	---	---	---	---	Human Genome U133 Plus 2.0 Array	Affymetrix NetAffx website
1553755_at	NXNL1	nucleoredoxin-like 1	19p13.11	NM_138454	115861	661836	608791	ENSG00000171773	Q0QD37 /// Q96CM4	NM_138454	---	cell redox homeostasis	electron carrier activity	nucleus /// nuclear outer membrane /// membrane	Human Genome U133 Plus 2.0 Array	Affymetrix NetAffx website
1553808_a_at	NKX2-3	NK2 transcription factor related, locus 3 (Drosophila)	10q24.2	NM_145285	159296	243272	606727	---	Q8TAU0	NM_145285	---	transcription /// regulation of transcription, DNA-dependent /// regulation of transcription	DNA binding /// transcription factor activity /// sequence-specific DNA binding	nucleus	Human Genome U133 Plus 2.0 Array	Affymetrix NetAffx website
1553828_at	FAM55A	family with sequence similarity 55, member A	11q23.2	NM_152315	120400	---	---	ENSG00000095110	Q8N323	NM_152315	---	---	---	extracellular region	Human Genome U133 Plus 2.0 Array	Affymetrix NetAffx website
1553906_s_at	FGD2	FYVE, RhoGEF and PH domain containing 2	6p21.2	NM_173558	221472	509664	605091	---	A8K304 /// Q7Z6J4	NM_173558	---	cytoskeleton organization and biogenesis /// regulation of cell shape /// actin cytoskeleton organization and biogenesis /// regulation of Rho protein signal transduction /// regulation of Cdc42 GTPase activity /// filopodium formation	guanyl-nucleotide exchange factor activity /// guanyl-nucleotide exchange factor activity /// Rho guanyl-nucleotide exchange factor activity /// protein binding /// zinc ion binding /// small GTPase binding /// metal ion binding	ruffle /// intracellular /// cytoplasm /// cytoplasm /// Golgi apparatus /// cytoskeleton /// lamellipodium	Human Genome U133 Plus 2.0 Array	Affymetrix NetAffx website
1553928_at	ELMOD2	ELMO/CED-12 domain containing 2	4q31.1	NM_153702	255520	450105	178500 /// 610196	ENSG00000179387	Q8IZ81	NM_153702	---	phagocytosis	---	cytoskeleton	Human Genome U133 Plus 2.0 Array	Affymetrix NetAffx website
1553954_at	ALG14	asparagine-linked glycosylation 14 homolog (S. cerevisiae)	1p21.3	NM_144988	199857	408927	---	ENSG00000172339	A8K030 /// Q96F25	BU682208	---	---	---	endoplasmic reticulum /// endoplasmic reticulum membrane /// membrane /// integral to membrane	Human Genome U133 Plus 2.0 Array	Affymetrix NetAffx website
1553962_s_at	RHOB	ras homolog gene family, member B	2p24	NM_004040	388	502876	165370	ENSG00000143878	P62745 /// Q7Z4F6	BI668074	---	angiogenesis /// transport /// apoptosis /// transformed cell apoptosis /// transformed cell apoptosis /// cell cycle /// cell adhesion /// cell adhesion /// small GTPase mediated signal transduction /// Rho protein signal transduction /// multicellular organismal development /// endosome to lysosome transport /// protein transport /// cell differentiation /// positive regulation of angiogenesis …	nucleotide binding /// GTPase activity /// protein binding /// GTP binding /// GTP binding	intracellular /// nucleus /// nucleus /// endosome /// plasma membrane /// plasma membrane /// endosome membrane /// membrane /// late endosome membrane	Human Genome U133 Plus 2.0 Array	Affymetrix NetAffx website
1553974_at	C22orf39	chromosome 22 open reading frame 39	22q11.21	NM_173793	128977	659565	---	ENSG00000185065	Q6P5X5	BC030758	---	---	---	---	Human Genome U133 Plus 2.0 Array	Affymetrix NetAffx website
1553976_a_at	RP11-529I10.4	deleted in a mouse model of primary ciliary dyskinesia	10q24.32	NM_015448	25911	658128	---	ENSG00000166171	Q5JQQ2 /// Q5JQQ4 /// Q9BVM2	BC031695	---	---	protein binding	---	Human Genome U133 Plus 2.0 Array	Affymetrix NetAffx website
1553986_at	RASEF	RAS and EF-hand domain containing	9q21.32	NM_152573	158158	657750	611344	ENSG00000165105	A8K4M1 /// Q8IZ41	BC023566	---	cell adhesion /// small GTPase mediated signal transduction /// protein transport	nucleotide binding /// structural molecule activity /// calcium ion binding /// GTP binding	cytoplasm /// actin cytoskeleton	Human Genome U133 Plus 2.0 Array	Affymetrix NetAffx website
1553992_s_at	NBR2	neighbor of BRCA1 gene 2	17q21	NR_003108	10230	---	---	---	O15453	BC034248	---	---	GTP binding	---	Human Genome U133 Plus 2.0 Array	Affymetrix NetAffx website
1553994_at	NT5E	5'-nucleotidase, ecto (CD73)	6q14-q21	NM_002526	4907	153952	129190	ENSG00000135318	P21589 /// Q53Z63 /// Q5JRQ1 /// Q5JRQ2 /// Q5W116 /// Q6NZX3 /// Q96B60	BC015940	---	DNA metabolic process /// nucleotide catabolic process	nucleotide binding /// 5'-nucleotidase activity /// 5'-nucleotidase activity /// zinc ion binding /// hydrolase activity /// hydrolase activity, acting on ester bonds /// metal ion binding	membrane fraction /// plasma membrane /// membrane /// anchored to membrane	Human Genome U133 Plus 2.0 Array	Affymetrix NetAffx website
1553995_a_at	NT5E	5'-nucleotidase, ecto (CD73)	6q14-q21	NM_002526	4907	153952	129190	ENSG00000135318	P21589 /// Q53Z63 /// Q5JRQ1 /// Q5JRQ2 /// Q5W116 /// Q6NZX3 /// Q96B60	BC015940	---	DNA metabolic process /// nucleotide catabolic process	nucleotide binding /// 5'-nucleotidase activity /// 5'-nucleotidase activity /// zinc ion binding /// hydrolase activity /// hydrolase activity, acting on ester bonds /// metal ion binding	membrane fraction /// plasma membrane /// membrane /// anchored to membrane	Human Genome U133 Plus 2.0 Array	Affymetrix NetAffx website
1554006_a_at	LLGL2	lethal giant larvae homolog 2 (Drosophila)	17q24-q25	NM_001015002 /// NM_001031803 /// NM_004524	3993	514477	---	ENSG00000073350	A0PJJ0 /// Q6P1M3	BC006503	---	cell cycle /// cell division	---	cytoplasm	Human Genome U133 Plus 2.0 Array	Affymetrix NetAffx website
1554021_a_at	ZNF12	zinc finger protein 12	7p22.1	NM_006956 /// NM_016265	7559	431471	194536	ENSG00000164631	A8WFQ8 /// P17014 /// Q6N016 /// Q6RFS4 /// Q8NHZ0 /// Q9H9P0	AF505656	---	transcription /// regulation of transcription, DNA-dependent	nucleic acid binding /// DNA binding /// zinc ion binding /// metal ion binding	intracellular /// nucleus	Human Genome U133 Plus 2.0 Array	Affymetrix NetAffx website
1554039_at	C14orf159	chromosome 14 open reading frame 159	14q32.12	NM_001102366 /// NM_001102367 /// NM_001102368 /// NM_001102369 /// NM_024952	80017	309849	---	ENSG00000133943	Q4LE40 /// Q53HP9 /// Q6IA66 /// Q7Z3D6 /// Q8NB88	BC009182	---	---	---	mitochondrion	Human Genome U133 Plus 2.0 Array	Affymetrix NetAffx website
1554077_a_at	TMEM53	transmembrane protein 53	1p34.1	NM_024587	79639	22157	---	ENSG00000126106	Q5TDE2 /// Q5TDE3 /// Q5TDE4 /// Q5TDE5 /// Q5TDE6 /// Q6P2H8	BC007521	---	---	---	membrane /// integral to membrane	Human Genome U133 Plus 2.0 Array	Affymetrix NetAffx website
1554082_a_at	NOL9	nucleolar protein 9	1p36.31	NM_024654	79707	59425	---	ENSG00000162408	Q2NL84 /// Q5SY16	BC009257	---	---	---	nucleus	Human Genome U133 Plus 2.0 Array	Affymetrix NetAffx website
1554089_s_at	SBDS /// SBDSP	Shwachman-Bodian-Diamond syndrome /// Shwachman-Bodian-Diamond syndrome pseudogene	7q11.21 /// 7q11.23	NM_016038 /// NR_001588	155370 /// 51119	110445	260400 /// 607444	ENSG00000126524	A8K0P4 /// Q9Y3A5	BC010183	---	inner cell mass cell proliferation /// ribosome biogenesis and assembly	---	cytoplasm	Human Genome U133 Plus 2.0 Array	Affymetrix NetAffx website
1554106_at	ALS2CR16	amyotrophic lateral sclerosis 2 (juvenile) chromosome region, candidate 16	2q33.2	XM_001134431 /// XM_001134454	130029	648846	---	---	A2RUL1 /// Q6ZP36	AB053318	---	---	---	---	Human Genome U133 Plus 2.0 Array	Affymetrix NetAffx website
1554126_at	MSRB3	methionine sulfoxide reductase B3	12q14.3	NM_001031679 /// NM_198080	253827	339024	---	ENSG00000174099	Q6MZU8 /// Q8IXL7	BC040053	---	---	peptide-methionine-(S)-S-oxide reductase activity /// zinc ion binding /// oxidoreductase activity /// metal ion binding	mitochondrion /// endoplasmic reticulum	Human Genome U133 Plus 2.0 Array	Affymetrix NetAffx website
1554132_a_at	KIAA1128	KIAA1128	10q23.1	NM_018999	54462	461988	---	ENSG00000107771	Q6N055 /// Q9H7U1	BC030528	---	G-protein coupled receptor protein signaling pathway	rhodopsin-like receptor activity	integral to membrane	Human Genome U133 Plus 2.0 Array	Affymetrix NetAffx website
1554148_a_at	SLC33A1	solute carrier family 33 (acetyl-CoA transporter), member 1	3q25.31	NM_004733	9197	478031	603690	ENSG00000169359	O00400	BC014416	---	transport /// transport	acetyl-CoA transporter activity	membrane fraction /// endoplasmic reticulum /// endoplasmic reticulum membrane /// endoplasmic reticulum membrane /// integral to plasma membrane /// membrane /// integral to membrane	Human Genome U133 Plus 2.0 Array	Affymetrix NetAffx website
1554154_at	GDAP2	ganglioside induced differentiation associated protein 2	1p12	NM_017686	54834	705484	---	ENSG00000196505	Q9NXN4	BC013132	---	---	---	---	Human Genome U133 Plus 2.0 Array	Affymetrix NetAffx website
1554168_a_at	SH3KBP1	SH3-domain kinase binding protein 1	Xp22.1-p21.3	NM_001024666 /// NM_031892	30011	444770	300374	ENSG00000147010	A8MTQ7 /// A8MUG8 /// Q5JPT1 /// Q5JPT2 /// Q5JPT3 /// Q5JPT4 /// Q5JPT5 /// Q5JPT6 /// Q5VSN0 /// Q96B97 /// Q9TGM1	AF542051	---	mitochondrial electron transport, NADH to ubiquinone /// endocytosis /// apoptosis /// cell-cell signaling	protein binding /// NADH dehydrogenase (ubiquinone) activity /// kinase activity /// oxidoreductase activity	cytoplasm /// mitochondrion /// membrane /// synaptosome /// cell junction /// synapse	Human Genome U133 Plus 2.0 Array	Affymetrix NetAffx website
1554178_a_at	FAM126B	family with sequence similarity 126, member B	2q33.1	NM_173822	285172	567816	---	ENSG00000155744	Q4ZG87 /// Q53TX6 /// Q8IXS8	BC039295	---	---	---	intracellular	Human Genome U133 Plus 2.0 Array	Affymetrix NetAffx website
1554208_at	MEI1	meiosis inhibitor 1	22q13.2	NM_152513	150365	116419	608797	ENSG00000167077	Q1XAP1 /// Q1XAP2 /// Q4G0I1 /// Q6ZRK7 /// Q8IYJ5 /// Q8N5K5 /// Q8N7P9 /// Q8N9H3 /// Q8N9Z4 /// Q8TC68	BC032248	---	---	binding	---	Human Genome U133 Plus 2.0 Array	Affymetrix NetAffx website
1554240_a_at	ITGAL	integrin, alpha L (antigen CD11A (p180), lymphocyte function-associated antigen 1; alpha polypeptide)	16p11.2	NM_001114380 /// NM_002209	3683	174103	153370	ENSG00000005844	P20701 /// Q96HB1	BC008777	<a target="external" href="http://www.wikipathways.org/index.php/Pathway:Homo_sapiens:Integrin-mediated_cell_adhesion_KEGG">Integrin-mediated_cell_adhesion_KEGG</a>	cell motility /// inflammatory response /// cell adhesion /// cell adhesion /// signal transduction /// integrin-mediated signaling pathway	magnesium ion binding /// receptor activity /// calcium ion binding /// protein binding /// protein binding	integrin complex /// integrin complex /// integrin complex /// membrane /// integral to membrane	Human Genome U133 Plus 2.0 Array	Affymetrix NetAffx website
1554241_at	COCH	coagulation factor C homolog, cochlin (Limulus polyphemus)	14q12-q13	NM_004086	1690	21016	601369 /// 603196	---	A8K9K9 /// O43405 /// Q6ZP09 /// Q96IU6	BC007230	---	sensory perception of sound /// sensory perception of sound	---	extracellular region /// proteinaceous extracellular matrix	Human Genome U133 Plus 2.0 Array	Affymetrix NetAffx website
1554245_x_at	ARL17P1 /// ARL17	ADP-ribosylation factor-like 17 pseudogene 1 /// ADP-ribosylation factor-like 17	17q21.31 /// 17q21.32	NM_001039083 /// NM_001103154 /// NM_001113738 /// NM_016632	51326 /// 641522	579108	---	ENSG00000136447 /// ENSG00000185829	B0AZR6 /// Q7KZJ4 /// Q8IVW1 /// Q9BVU5	BC030570	---	transport /// protein transport /// vesicle-mediated transport	nucleotide binding /// GTP binding	Golgi apparatus	Human Genome U133 Plus 2.0 Array	Affymetrix NetAffx website
1554246_at	C1orf210	chromosome 1 open reading frame 210	1p34.2	NM_182517	149466	158963	---	ENSG00000184157	Q8IVY1	BC041633	---	---	---	membrane /// integral to membrane	Human Genome U133 Plus 2.0 Array	Affymetrix NetAffx website
1554249_a_at	ZNF638	zinc finger protein 638	2p13.2-p13.1	NM_001014972 /// NM_014497	27332	434401	---	ENSG00000075292	A8K583 /// Q14966 /// Q57Z90 /// Q6ZQV0	BC024000	---	RNA splicing	nucleic acid binding /// DNA binding /// double-stranded DNA binding /// RNA binding /// RNA binding /// zinc ion binding /// metal ion binding	intracellular /// nucleus /// nucleoplasm /// cytoplasm /// nuclear speck	Human Genome U133 Plus 2.0 Array	Affymetrix NetAffx website
1554260_a_at	FRYL	FRY-like	4p12	NM_015030 /// XM_001127121	285527	631525	---	ENSG00000075539	A1L0R6 /// O94915 /// Q6AI58 /// Q6ZNE6 /// Q6ZR29	BC021803	---	transcription /// regulation of transcription, DNA-dependent	binding	---	Human Genome U133 Plus 2.0 Array	Affymetrix NetAffx website
1554273_a_at	ERAP2	endoplasmic reticulum aminopeptidase 2	5q15	NM_022350	64167	591249	609497	ENSG00000164308	Q6P179	BC017927	---	proteolysis /// immune response /// regulation of blood pressure /// antigen processing and presentation of endogenous peptide antigen via MHC class I	aminopeptidase activity /// aminopeptidase activity /// peptidase activity /// metallopeptidase activity /// metallopeptidase activity /// zinc ion binding /// zinc ion binding /// hydrolase activity /// metal ion binding /// N-terminal lysine aminopeptidase activity /// N-terminal arginine aminopeptidase activity	endoplasmic reticulum /// endoplasmic reticulum lumen /// endoplasmic reticulum membrane /// membrane /// integral to membrane	Human Genome U133 Plus 2.0 Array	Affymetrix NetAffx website
1554327_a_at	CANT1	calcium activated nucleotidase 1	17q25.3	NM_138793	124583	8859	---	ENSG00000171302	Q8WVQ1	AF328554	---	positive regulation of I-kappaB kinase/NF-kappaB cascade	signal transducer activity /// calcium ion binding /// pyrophosphatase activity /// hydrolase activity /// nucleoside-diphosphatase activity /// metal ion binding	extracellular region /// endoplasmic reticulum /// endoplasmic reticulum membrane /// Golgi apparatus /// membrane /// integral to membrane	Human Genome U133 Plus 2.0 Array	Affymetrix NetAffx website
1554351_a_at	TIPRL	TIP41, TOR signaling pathway regulator-like (S. cerevisiae)	1q23.2	NM_001031800 /// NM_152902	261726	209431	611807	ENSG00000143155	O75663	BC009506	---	---	protein binding	---	Human Genome U133 Plus 2.0 Array	Affymetrix NetAffx website
1554365_a_at	PPP2R5C	protein phosphatase 2, regulatory subunit B', gamma isoform	14q32	NM_002719 /// NM_178586 /// NM_178587 /// NM_178588	5527	368264	601645	ENSG00000078304	Q13362 /// Q6ZN33 /// Q7L7W2 /// Q86U13 /// Q96B13 /// Q96L51 /// Q96L52	BC016183	<a target="external" href="http://www.wikipathways.org/index.php/Pathway:Homo_sapiens:Glycogen_Metabolism">Glycogen_Metabolism</a> /// <a target="external" href="http://www.wikipathways.org/index.php/Pathway:Homo_sapiens:Wnt_signaling">Wnt_signaling</a>	signal transduction /// signal transduction /// protein processing	binding /// protein binding /// peptidase activity /// protein phosphatase type 2A regulator activity /// protein phosphatase type 2A regulator activity	protein phosphatase type 2A complex /// protein phosphatase type 2A complex /// nucleus /// nucleus /// integral to membrane	Human Genome U133 Plus 2.0 Array	Affymetrix NetAffx website
1554375_a_at	NR1H4	nuclear receptor subfamily 1, group H, member 4	12q23.1	NM_005123	9971	282735	603826	ENSG00000012504	A1L4K5 /// Q6IPQ7 /// Q7Z2W0 /// Q96RI1	AF478446	---	negative regulation of transcription from RNA polymerase II promoter /// transcription /// regulation of transcription, DNA-dependent /// signal transduction /// bile acid metabolic process /// bile acid metabolic process /// response to glucose stimulus	DNA binding /// double-stranded DNA binding /// transcription factor activity /// transcription factor activity /// steroid hormone receptor activity /// transcription coactivator activity /// transcription corepressor activity /// receptor activity /// ligand-dependent nuclear receptor activity /// ligand-dependent nuclear receptor activity /// protein binding /// zinc ion binding /// transcript…	nucleus	Human Genome U133 Plus 2.0 Array	Affymetrix NetAffx website
1554390_s_at	ACTR2	ARP2 actin-related protein 2 homolog (yeast)	2p14	NM_001005386 /// NM_005722	10097	699451	604221	ENSG00000138071	P61160 /// Q8IY98	BC036253	---	cell motility	nucleotide binding /// actin binding /// protein binding /// protein binding /// ATP binding	cytoplasm /// cytoskeleton /// Arp2/3 protein complex /// actin cytoskeleton /// cell projection	Human Genome U133 Plus 2.0 Array	Affymetrix NetAffx website
1554397_s_at	UEVLD	UEV and lactate/malate dehyrogenase domains	11p15.1	NM_001040697 /// NM_018314	55293	407991	610985	ENSG00000151116	A8MYV4 /// Q8IX04	BC011011	---	carbohydrate metabolic process /// glycolysis /// protein modification process /// ubiquitin cycle /// metabolic process /// protein transport /// post-translational protein modification /// cellular carbohydrate metabolic process /// regulation of protein metabolic process	catalytic activity /// binding /// oxidoreductase activity /// oxidoreductase activity, acting on the CH-OH group of donors, NAD or NADP as acceptor /// small conjugating protein ligase activity	---	Human Genome U133 Plus 2.0 Array	Affymetrix NetAffx website
1554406_a_at	CLEC7A	C-type lectin domain family 7, member A	12p13.2	NM_022570 /// NM_197947 /// NM_197948 /// NM_197949 /// NM_197950 /// NM_197954	64581	143929	606264	ENSG00000172243	Q68D78 /// Q96D32 /// Q96PA4 /// Q9BXN2	BC013385	---	phagocytosis, recognition /// inflammatory response /// immune response /// cell recognition /// carbohydrate mediated signaling /// T cell activation /// defense response to protozoan /// innate immune response	receptor activity /// binding /// sugar binding /// sugar binding /// pattern recognition receptor activity /// MHC protein binding	cytoplasm /// membrane /// integral to membrane /// integral to membrane	Human Genome U133 Plus 2.0 Array	Affymetrix NetAffx website
1554408_a_at	TK1	thymidine kinase 1, soluble	17q23.2-q25.3	NM_003258	7083	515122	188300	ENSG00000167900	P04183	BC007986	---	nucleobase, nucleoside, nucleotide and nucleic acid metabolic process /// DNA replication	nucleotide binding /// thymidine kinase activity /// thymidine kinase activity /// ATP binding /// kinase activity /// transferase activity	cytoplasm /// cytoplasm	Human Genome U133 Plus 2.0 Array	Affymetrix NetAffx website
1554411_at	CTNNB1	catenin (cadherin-associated protein), beta 1, 88kDa	3p21	NM_001098209 /// NM_001098210 /// NM_001904	1499	476018	114550 /// 116806 /// 132600 /// 155255	ENSG00000168036	A8K1L7 /// P35222	AB062292	<a target="external" href="http://www.wikipathways.org/index.php/Pathway:Homo_sapiens:TGF_Beta_Signaling_Pathway">TGF_Beta_Signaling_Pathway</a> /// <a target="external" href="http://www.wikipathways.org/index.php/Pathway:Homo_sapiens:Wnt_signaling">Wnt_signaling</a>	negative regulation of transcription from RNA polymerase II promoter /// cellular morphogenesis during differentiation /// skeletal development /// patterning of blood vessels /// endoderm formation /// cell fate specification /// cell fate determination /// endodermal cell fate commitment /// epithelial to mesenchymal transition /// transcription /// regulation of transcription, DNA-dependent //…	chromatin binding /// double-stranded DNA binding /// transcription factor activity /// transcription coactivator activity /// transcription coactivator activity /// signal transducer activity /// structural molecule activity /// binding /// protein binding /// protein binding /// protein C-terminus binding /// transcription factor binding /// alpha-catenin binding /// cadherin binding /// androg…	membrane fraction /// nucleus /// nucleus /// transcription factor complex /// cytoplasm /// cytoskeleton /// cytoskeleton /// plasma membrane /// plasma membrane /// fascia adherens /// basolateral plasma membrane /// lateral plasma membrane /// lateral plasma membrane /// Z disc /// lamellipodium /// beta-catenin destruction complex /// microvillus membrane /// apical junction complex /// apica…	Human Genome U133 Plus 2.0 Array	Affymetrix NetAffx website
1554414_a_at	OSGIN2	oxidative stress induced growth inhibitor family member 2	8q21	NM_001126111 /// NM_004337	734	436445	604598	ENSG00000164823	Q9Y236	BC031054	---	meiosis /// meiosis /// germ cell development	---	---	Human Genome U133 Plus 2.0 Array	Affymetrix NetAffx website
1554417_s_at	APH1A	anterior pharynx defective 1 homolog A (C. elegans)	1p36.13-q31.3	NM_001077628 /// NM_016022	51107	108408	607629	ENSG00000117362	A6NM39 /// Q5TB21 /// Q5TB22 /// Q5TB23 /// Q96BI3	AY113699	---	membrane protein ectodomain proteolysis /// Notch signaling pathway /// Notch receptor processing /// Notch receptor processing /// protein processing /// protein processing /// membrane protein intracellular domain proteolysis /// amyloid precursor protein catabolic process /// amyloid precursor protein catabolic process /// positive regulation of catalytic activity /// positive regulation of ca…	protein binding /// protein binding /// protein binding	endoplasmic reticulum /// endoplasmic reticulum /// endoplasmic reticulum membrane /// Golgi apparatus /// Golgi apparatus /// integral to plasma membrane /// membrane /// integral to membrane	Human Genome U133 Plus 2.0 Array	Affymetrix NetAffx website
1554433_a_at	ZNF146	zinc finger protein 146	19q13.1	NM_001099638 /// NM_001099639 /// NM_007145	7705	643436	601505	ENSG00000167635	Q15072	BC005154	---	regulation of transcription, DNA-dependent	nucleic acid binding /// DNA binding /// DNA binding /// heparin binding /// zinc ion binding /// zinc ion binding /// metal ion binding	intracellular /// nucleus /// nucleus	Human Genome U133 Plus 2.0 Array	Affymetrix NetAffx website
1554436_a_at	REG4	regenerating islet-derived family, member 4	1p13.1-p12	NM_032044	83998	660883	609846	ENSG00000134193	Q5T3X5 /// Q9BYZ8	AY126671	---	---	binding /// sugar binding	extracellular region	Human Genome U133 Plus 2.0 Array	Affymetrix NetAffx website
1554438_at	KIAA1217	KIAA1217	10p12.2-p12.1	NM_001098500 /// NM_001098501 /// NM_019590	56243	445885	---	ENSG00000120549	A6NLF3 /// Q5T5P0 /// Q5T5P1 /// Q5T5P2	BC018764	---	multicellular organismal development /// embryonic skeletal development	---	cytoplasm /// cytoplasm	Human Genome U133 Plus 2.0 Array	Affymetrix NetAffx website
1554450_s_at	MIER3	mesoderm induction early response 1, family member 3	5q11.2	NM_152622	166968	657594	---	ENSG00000155545	A8MQD4 /// Q7Z3K6	BC041348	---	transcription /// regulation of transcription, DNA-dependent	DNA binding	nucleus	Human Genome U133 Plus 2.0 Array	Affymetrix NetAffx website
1554452_a_at	HIG2	hypoxia-inducible protein 2	7q32.1	NM_001098786 /// NM_013332	29923	710088	---	ENSG00000135245	A4D0Z5 /// Q53HJ7 /// Q96HI5 /// Q9Y5L2	BC001863	---	response to stress /// response to stress	---	membrane /// integral to membrane	Human Genome U133 Plus 2.0 Array	Affymetrix NetAffx website
1554462_a_at	DNAJB9	DnaJ (Hsp40) homolog, subfamily B, member 9	7q31|14q24.2-q24.3	NM_012328	4189	6790	602634	ENSG00000128590	O95037 /// Q6FIF1 /// Q9UBS3	AF115512	---	protein folding	chaperone regulator activity /// chaperone regulator activity /// heat shock protein binding /// unfolded protein binding	nucleus /// nucleolus /// nucleolus /// cytoplasm /// cytoplasm /// endoplasmic reticulum	Human Genome U133 Plus 2.0 Array	Affymetrix NetAffx website
1554464_a_at	CRTAP	cartilage associated protein	3p22.3	NM_006371	10491	517888	605497 /// 610682 /// 610854	ENSG00000170275	O75718 /// Q8NB01	BC008745	---	---	---	extracellular region /// proteinaceous extracellular matrix	Human Genome U133 Plus 2.0 Array	Affymetrix NetAffx website
1554471_a_at	ANKRD13C	ankyrin repeat domain 13C	1p32.3-p31.3	NM_030816	81573	105016	---	ENSG00000118454	Q8N6S4	BC028840	---	---	---	endoplasmic reticulum	Human Genome U133 Plus 2.0 Array	Affymetrix NetAffx website
1554479_a_at	CARD8	caspase recruitment domain family, member 8	19q13.32	NM_014959	22900	446146	609051	ENSG00000105483	Q4G0N6 /// Q6MZI8 /// Q8N4D5 /// Q9Y2G2	AF511652	---	apoptosis /// regulation of apoptosis /// negative regulation of I-kappaB kinase/NF-kappaB cascade /// positive regulation of caspase activity /// positive regulation of interleukin-1 beta secretion	protein binding /// protein binding /// caspase activator activity /// NACHT domain binding /// protein homodimerization activity	intracellular /// nucleus /// nucleus /// cytoplasm /// cytoplasm	Human Genome U133 Plus 2.0 Array	Affymetrix NetAffx website
1554480_a_at	ARMC10	armadillo repeat containing 10	7q22.1	NM_031905	83787	287412	611864	ENSG00000170632	A8K703 /// Q8N2F6	AY150851	---	regulation of cell growth	binding	endoplasmic reticulum /// endoplasmic reticulum membrane /// membrane /// integral to membrane	Human Genome U133 Plus 2.0 Array	Affymetrix NetAffx website
1554482_a_at	SAR1B	SAR1 gene homolog B (S. cerevisiae)	5q31.1	NM_001033503 /// NM_016103	51128	432984	246700 /// 607689 /// 607690	ENSG00000152700	Q53F37 /// Q9H029 /// Q9Y6B6	BC002847	---	transport /// intracellular protein transport /// small GTPase mediated signal transduction /// protein transport /// vesicle-mediated transport	nucleotide binding /// magnesium ion binding /// GTP binding /// metal ion binding	intracellular /// endoplasmic reticulum /// endoplasmic reticulum membrane /// Golgi apparatus /// membrane	Human Genome U133 Plus 2.0 Array	Affymetrix NetAffx website
1554483_at	TMEM37	transmembrane protein 37	2q14.2	NM_183240	140738	26216	---	ENSG00000171227	Q86SV2 /// Q8WXS4	AF361356	---	transport /// ion transport /// calcium ion transport	ion channel activity /// voltage-gated ion channel activity /// calcium channel activity /// calcium ion binding	membrane /// integral to membrane	Human Genome U133 Plus 2.0 Array	Affymetrix NetAffx website
1554485_s_at	TMEM37	transmembrane protein 37	2q14.2	NM_183240	140738	26216	---	ENSG00000171227	Q86SV2 /// Q8WXS4	BI825302	---	transport /// ion transport /// calcium ion transport	ion channel activity /// voltage-gated ion channel activity /// calcium channel activity /// calcium ion binding	membrane /// integral to membrane	Human Genome U133 Plus 2.0 Array	Affymetrix NetAffx website
1554489_a_at	CEP70	centrosomal protein 70kDa	3q22-q23	NM_024491	80321	531962	---	ENSG00000114107	Q8NHQ1	BC016050	---	---	---	centrosome	Human Genome U133 Plus 2.0 Array	Affymetrix NetAffx website
1554509_a_at	C10orf97	chromosome 10 open reading frame 97	10p13	NM_024948	80013	590985	611649	ENSG00000148481	A8MW85 /// Q9H8M7	BC020605	---	apoptosis	calcium ion binding	nucleus	Human Genome U133 Plus 2.0 Array	Affymetrix NetAffx website
1554510_s_at	GHITM	growth hormone inducible transmembrane protein	10q23.1	NM_014394	27069	352656	---	ENSG00000165678	A8K9Z9 /// Q5VT94 /// Q658I8 /// Q6FIA7 /// Q9H3K2 /// Q9P099 /// Q9Y6G2	AB009685	---	---	---	mitochondrion /// membrane /// integral to membrane /// integral to membrane	Human Genome U133 Plus 2.0 Array	Affymetrix NetAffx website
1554539_a_at	RHOF	ras homolog gene family, member F (in filopodia)	12q24.31	NM_019034	54509	524804	---	ENSG00000139725	A8K0B7 /// Q9HBH0	BC018208	---	actin filament organization /// small GTPase mediated signal transduction	nucleotide binding /// GTPase activity /// GTP binding	intracellular /// cytoplasm /// cytoskeleton /// cytoskeleton /// plasma membrane /// membrane	Human Genome U133 Plus 2.0 Array	Affymetrix NetAffx website
1554544_a_at	MBP	myelin basic protein	18q23	NM_001025081 /// NM_001025090 /// NM_001025092 /// NM_001025100 /// NM_001025101 /// NM_002385	4155	551713	159430	ENSG00000197971	A6NI84 /// A6NP45 /// A8K1H8 /// A8MUU4 /// A8MWV2 /// A8MY86 /// A8MYL4 /// A8MZH3 /// P02686 /// Q6ZVA1	L18865	<a target="external" href="http://www.wikipathways.org/index.php/Pathway:Homo_sapiens:MAPK_Cascade">MAPK_Cascade</a>	immune response /// synaptic transmission /// central nervous system development /// axon ensheathment	structural molecule activity /// structural constituent of myelin sheath	membrane /// myelin sheath	Human Genome U133 Plus 2.0 Array	Affymetrix NetAffx website
1554553_s_at	YIF1B	Yip1 interacting factor homolog B (S. cerevisiae)	19q13.2	NM_001039671 /// NM_001039672 /// NM_001039673 /// NM_033557	90522	280741	---	ENSG00000167645	Q5BJH7	BC014974	---	---	---	membrane /// integral to membrane	Human Genome U133 Plus 2.0 Array	Affymetrix NetAffx website
1554556_a_at	ATP11B	ATPase, class VI, type 11B	3q27	NM_014616	23200	478429	605869	---	A5XEH5 /// Q7Z678 /// Q8N4L6 /// Q9Y2G3	BC033880	---	transport /// ion transport /// metabolic process /// phospholipid transport /// aminophospholipid transport	nucleotide binding /// magnesium ion binding /// catalytic activity /// phospholipid-translocating ATPase activity /// phospholipid-translocating ATPase activity /// binding /// ATP binding /// ion transmembrane transporter activity /// ATPase activity, coupled to transmembrane movement of ions, phosphorylative mechanism /// hydrolase activity /// metal ion binding	nuclear inner membrane /// membrane /// integral to membrane	Human Genome U133 Plus 2.0 Array	Affymetrix NetAffx website
1554575_a_at	BPNT1	3'(2'), 5'-bisphosphate nucleotidase 1	1q41	NM_006085	10380	406134	604053	ENSG00000162813	A6NF51 /// A8K7C8 /// O95861	BC017801	---	nucleobase, nucleoside, nucleotide and nucleic acid metabolic process /// nervous system development	magnesium ion binding /// inositol or phosphatidylinositol phosphatase activity /// 3'(2'),5'-bisphosphate nucleotidase activity /// 3'(2'),5'-bisphosphate nucleotidase activity /// hydrolase activity /// lithium ion binding /// metal ion binding	---	Human Genome U133 Plus 2.0 Array	Affymetrix NetAffx website
1554577_a_at	PSMD10	proteasome (prosome, macropain) 26S subunit, non-ATPase, 10	Xq22.3	NM_002814 /// NM_170750	5716	522752	603480	ENSG00000101843	O75832 /// Q5U0B2 /// Q8IZK9	AY057056	<a target="external" href="http://www.wikipathways.org/index.php/Pathway:Homo_sapiens:Proteasome_Degradation">Proteasome_Degradation</a>	---	protein binding	proteasome complex /// cytosol /// proteasome regulatory particle /// protein complex	Human Genome U133 Plus 2.0 Array	Affymetrix NetAffx website
1554616_at	SERPINB8	serpin peptidase inhibitor, clade B (ovalbumin), member 8	18q21.3	NM_001031848 /// NM_002640 /// NM_198833	5271	368077	601697	ENSG00000166401	P50452 /// Q7Z2V6 /// Q8N178	BC034528	---	---	endopeptidase inhibitor activity /// serine-type endopeptidase inhibitor activity /// serine-type endopeptidase inhibitor activity /// protein binding	cytoplasm /// cytosol	Human Genome U133 Plus 2.0 Array	Affymetrix NetAffx website
1554627_a_at	ASCC1	activating signal cointegrator 1 complex subunit 1	10pter-q25.3	NM_015947	51008	500007	---	ENSG00000138303	Q5SW06 /// Q5SW07 /// Q8N9N2	BC012291	---	transcription /// regulation of transcription, DNA-dependent /// regulation of transcription	RNA binding	cytoplasm	Human Genome U133 Plus 2.0 Array	Affymetrix NetAffx website
1554628_at	ZNF57	zinc finger protein 57	19p13.3	NM_173480	126295	591378	---	ENSG00000171970	A5HJR3 /// A8MY82 /// Q68EA5	BC028974	---	transcription /// regulation of transcription, DNA-dependent	nucleic acid binding /// DNA binding /// zinc ion binding /// metal ion binding	intracellular /// nucleus	Human Genome U133 Plus 2.0 Array	Affymetrix NetAffx website
1554667_s_at	METTL8	methyltransferase like 8	2q31.1	NM_024770	79828	135146	609525	ENSG00000123600	A8K7U3 /// Q9H825	BC025250	---	---	methyltransferase activity /// transferase activity	nucleus /// cytoplasm	Human Genome U133 Plus 2.0 Array	Affymetrix NetAffx website
1554676_at	SRGN	serglycin	10q22.1	NM_002727	5552	1908	177040	---	P10124	BC022313	---	ossification /// apoptosis /// apoptosis /// negative regulation of bone mineralization /// mast cell secretory granule organization and biogenesis /// mast cell secretory granule organization and biogenesis /// T cell secretory granule organization and biogenesis /// T cell secretory granule organization and biogenesis /// maintenance of protease location in mast cell secretory granule /// maint…	protein binding /// protein binding	extracellular region /// extracellular space /// Golgi apparatus /// Golgi apparatus /// mast cell granule /// mast cell granule	Human Genome U133 Plus 2.0 Array	Affymetrix NetAffx website
1554678_s_at	HNRPDL	heterogeneous nuclear ribonucleoprotein D-like	4q13-q21	NM_031372 /// NR_003249	9987	527105	607137	ENSG00000152795	O14979	AB066484	---	transcription /// regulation of transcription, DNA-dependent /// RNA processing	nucleotide binding /// nucleic acid binding /// DNA binding /// double-stranded DNA binding /// single-stranded DNA binding /// RNA binding /// protein binding /// poly(A) binding	nucleus /// nucleus /// cytoplasm /// heterogeneous nuclear ribonucleoprotein complex	Human Genome U133 Plus 2.0 Array	Affymetrix NetAffx website
1554679_a_at	LAPTM4B	lysosomal associated protein transmembrane 4 beta	8q22.1	NM_018407	55353	492314	---	ENSG00000104341	Q86SJ0 /// Q86VI4 /// Q9NY06	AF317417	---	transport	---	endomembrane system /// membrane /// integral to membrane	Human Genome U133 Plus 2.0 Array	Affymetrix NetAffx website
1554685_a_at	KIAA1199	KIAA1199	15q24	NM_018689	57214	459088	608366	ENSG00000103888	Q6L9J5 /// Q8WUJ3	BC020256	---	sensory perception of sound	---	---	Human Genome U133 Plus 2.0 Array	Affymetrix NetAffx website
1554690_a_at	TACC1	transforming, acidic coiled-coil containing protein 1	8p11	NM_001122824 /// NM_006283	6867	279245	605301	ENSG00000147526	O75410 /// Q5HYH0 /// Q8IUJ5	BC041391	---	cell cycle /// cell division	protein binding	nucleus /// cytoplasm	Human Genome U133 Plus 2.0 Array	Affymetrix NetAffx website
1554696_s_at	TYMS	thymidylate synthetase	18p11.32	NM_001071	7298	592338	188350	ENSG00000176890	A8K9A5 /// P04818 /// Q53FB7 /// Q53Y97 /// Q8WYK3 /// Q8WYK4	AB077208	---	nucleobase, nucleoside, nucleotide and nucleic acid metabolic process /// dTMP biosynthetic process /// DNA replication /// DNA repair /// deoxyribonucleoside monophosphate biosynthetic process /// nucleotide biosynthetic process /// phosphoinositide-mediated signaling	thymidylate synthase activity /// methyltransferase activity /// transferase activity	---	Human Genome U133 Plus 2.0 Array	Affymetrix NetAffx website
1554741_s_at	FGF7 /// KGFLP1 /// KGFLP2	fibroblast growth factor 7 (keratinocyte growth factor) /// keratinocyte growth factor-like protein 1 /// keratinocyte growth factor-like protein 2	15q15-q21.1 /// 9p11.2 /// 9p12	NM_002009 /// NR_003670 /// NR_003674	2252 /// 387628 /// 654466	536967	148180	ENSG00000140285 /// ENSG00000204837	P21781 /// Q2TVT3 /// Q2TVT4 /// Q6FGV5 /// Q6RK68 /// Q8NFD4 /// Q96FG5	AF523265	---	signal transduction /// cell-cell signaling /// cell proliferation /// positive regulation of cell proliferation /// epidermis development /// response to wounding	growth factor activity /// growth factor activity	extracellular region /// extracellular region	Human Genome U133 Plus 2.0 Array	Affymetrix NetAffx website
1554747_a_at	SEPT2	septin 2	2q37	NM_001008491 /// NM_001008492 /// NM_004404 /// NM_006155	4735	335057	601506	ENSG00000168385	Q15019 /// Q53QU3	BC033559	---	cell cycle /// cell division	nucleotide binding /// protein binding /// protein binding /// GTP binding	nucleus /// cytoplasm /// septin complex	Human Genome U133 Plus 2.0 Array	Affymetrix NetAffx website
1554757_a_at	INPP5A	inositol polyphosphate-5-phosphatase, 40kDa	10q26.3	NM_005539	3632	709221	600106	ENSG00000068383	Q14642 /// Q149S6 /// Q4VAR4 /// Q5JT87 /// Q5T1B4 /// Q5T1B5 /// Q86V83 /// Q8N6C1 /// Q9C055	AF273055	---	cell communication	inositol or phosphatidylinositol phosphatase activity /// inositol-polyphosphate 5-phosphatase activity /// inositol-polyphosphate 5-phosphatase activity /// hydrolase activity	membrane /// membrane	Human Genome U133 Plus 2.0 Array	Affymetrix NetAffx website
1554768_a_at	MAD2L1	MAD2 mitotic arrest deficient-like 1 (yeast)	4q27	NM_002358	4085	591697	601467	ENSG00000164109	Q13257 /// Q53F56 /// Q548X9 /// Q6IRW7 /// Q8IZX3	AF394735	<a target="external" href="http://www.wikipathways.org/index.php/Pathway:Homo_sapiens:Cell_cycle_KEGG">Cell_cycle_KEGG</a>	cell cycle /// mitosis /// mitosis /// mitotic cell cycle checkpoint /// cell division	protein binding	kinetochore /// nucleus	Human Genome U133 Plus 2.0 Array	Affymetrix NetAffx website
1554795_a_at	FBLIM1	filamin binding LIM protein 1	1p36.21	NM_001024215 /// NM_001024216 /// NM_017556	54751	530101	607747	ENSG00000162458	Q5VVD6 /// Q8WUP2	BC019895	---	cell adhesion /// regulation of cell shape	protein binding /// zinc ion binding /// metal ion binding	cytoplasm /// cytoskeleton /// cell junction	Human Genome U133 Plus 2.0 Array	Affymetrix NetAffx website
1554806_a_at	FBXO8	F-box protein 8	4q34.1	NM_012180	26269	76917	605649	ENSG00000164117	Q8IWE1 /// Q8IXA8 /// Q9NRD0	BC040456	---	ubiquitin-dependent protein catabolic process /// regulation of ARF protein signal transduction	guanyl-nucleotide exchange factor activity /// ARF guanyl-nucleotide exchange factor activity /// ARF guanyl-nucleotide exchange factor activity	ubiquitin ligase complex /// intracellular	Human Genome U133 Plus 2.0 Array	Affymetrix NetAffx website
1554834_a_at	RASSF5	Ras association (RalGDS/AF-6) domain family member 5	1q32.1	NM_182663 /// NM_182664 /// NM_182665	83593	497579	607020	ENSG00000136653	A8K1E6 /// A8K5F3 /// A8K7M4 /// Q59GG4 /// Q8TEK8 /// Q8WWW0	AY062002	---	apoptosis /// cell cycle /// signal transduction /// intracellular signaling cascade /// negative regulation of cell cycle	protein binding /// protein binding /// zinc ion binding /// diacylglycerol binding /// metal ion binding	cytoplasm /// microtubule	Human Genome U133 Plus 2.0 Array	Affymetrix NetAffx website
1554835_a_at	B3GNT5	UDP-GlcNAc:betaGal beta-1,3-N-acetylglucosaminyltransferase 5	3q28	NM_032047	84002	208267	---	ENSG00000176597	Q9BYG0	BC028058	---	protein amino acid glycosylation /// protein amino acid glycosylation /// multicellular organismal development /// central nervous system development /// glycolipid biosynthetic process	galactosyltransferase activity /// beta-galactosyl-N-acetylglucosaminylgalactosylglucosyl-ceramide beta-1,3-acetylglucosaminyltransferase activity /// lipopolysaccharide N-acetylglucosaminyltransferase activity /// transferase activity /// transferase activity, transferring glycosyl groups	Golgi membrane /// intracellular /// Golgi apparatus /// membrane /// integral to membrane	Human Genome U133 Plus 2.0 Array	Affymetrix NetAffx website
1554842_at	SLC12A1	solute carrier family 12 (sodium/potassium/chloride transporters), member 1	15q15-q21.1	NM_000338	6557	123116	600839 /// 601678	---	A8JYA2 /// P0C2S0 /// Q13621 /// Q8IUN5	BC040138	---	transport /// transport /// ion transport /// potassium ion transport /// sodium ion transport /// chloride transport	transporter activity /// sodium:potassium:chloride symporter activity /// symporter activity /// cation:chloride symporter activity /// potassium ion binding /// sodium ion binding	membrane fraction /// plasma membrane /// membrane /// integral to membrane	Human Genome U133 Plus 2.0 Array	Affymetrix NetAffx website
1554868_s_at	PCNP	PEST proteolytic signal containing nuclear protein	3q12.3	NM_020357	57092	654949	---	ENSG00000081154	Q53GF3 /// Q8WW12	BC013916	---	cell cycle /// protein ubiquitination /// proteasomal ubiquitin-dependent protein catabolic process	protein binding	nucleus /// nucleus	Human Genome U133 Plus 2.0 Array	Affymetrix NetAffx website
1554878_a_at	ABCD3	ATP-binding cassette, sub-family D (ALD), member 3	1p22-p21	NM_001122674 /// NM_002858	5825	700576	170995	ENSG00000117528	P28288	BC009712	---	transport /// peroxisome organization and biogenesis /// peroxisomal long-chain fatty acid import	nucleotide binding /// protein binding /// ATP binding /// ATPase activity /// nucleoside-triphosphatase activity /// ATPase activity, coupled to transmembrane movement of substances /// ATPase activity, coupled to transmembrane movement of substances	peroxisome /// peroxisome /// peroxisomal membrane /// peroxisomal membrane /// integral to peroxisomal membrane /// membrane /// integral to membrane	Human Genome U133 Plus 2.0 Array	Affymetrix NetAffx website
1554895_a_at	RHBDL2	rhomboid, veinlet-like 2 (Drosophila)	1p34.3	NM_017821	54933	524626	608962	ENSG00000158315	Q9NX52	BC013103	---	signal transduction	serine-type endopeptidase activity /// peptidase activity /// hydrolase activity	membrane /// integral to membrane	Human Genome U133 Plus 2.0 Array	Affymetrix NetAffx website
1554897_s_at	RHBDL2	rhomboid, veinlet-like 2 (Drosophila)	1p34.3	NM_017821	54933	524626	608962	ENSG00000158315	Q9NX52	BC013103	---	signal transduction	serine-type endopeptidase activity /// peptidase activity /// hydrolase activity	membrane /// integral to membrane	Human Genome U133 Plus 2.0 Array	Affymetrix NetAffx website
1554899_s_at	FCER1G	Fc fragment of IgE, high affinity I, receptor for; gamma polypeptide	1q23	NM_004106	2207	433300	147139	ENSG00000158869	A6NCQ8 /// P30273	BC020763	---	positive regulation of type IIa hypersensitivity /// positive regulation of type III hypersensitivity /// positive regulation of type I hypersensitivity /// Fc receptor mediated stimulatory signaling pathway /// phagocytosis, engulfment /// immune response /// cell surface receptor linked signal transduction /// immunoglobulin mediated immune response /// antigen processing and presentation of ex…	receptor activity /// transmembrane receptor activity /// receptor signaling protein activity /// protein binding /// protein binding /// IgE receptor activity /// IgE binding /// IgG binding	plasma membrane /// integral to plasma membrane /// integral to plasma membrane /// external side of plasma membrane /// membrane /// integral to membrane /// Fc-epsilon receptor I complex	Human Genome U133 Plus 2.0 Array	Affymetrix NetAffx website
1554915_a_at	PDE12	phosphodiesterase 12	3p14.3	NM_177966	201626	572993	---	ENSG00000174840	Q6L8Q7	BC034978	---	---	hydrolase activity	---	Human Genome U133 Plus 2.0 Array	Affymetrix NetAffx website
1554930_a_at	FUT8	fucosyltransferase 8 (alpha (1,6) fucosyltransferase)	14q24.3	NM_004480 /// NM_178154 /// NM_178155 /// NM_178156 /// NM_178157	2530	654961	602589	ENSG00000033170	A5PLL2 /// A8K8P8 /// Q546E0 /// Q8IUA5 /// Q9BYC5	AB049740	---	in utero embryonic development /// protein amino acid N-linked glycosylation /// N-glycan processing /// oligosaccharide biosynthetic process /// L-fucose catabolic process	glycoprotein 6-alpha-L-fucosyltransferase activity /// glycoprotein 6-alpha-L-fucosyltransferase activity /// transferase activity /// transferase activity, transferring glycosyl groups	Golgi apparatus /// Golgi apparatus /// membrane /// integral to membrane	Human Genome U133 Plus 2.0 Array	Affymetrix NetAffx website
1554966_a_at	FILIP1L	filamin A interacting protein 1-like	3q12.1	NM_001042459 /// NM_014890 /// NM_182909	11259	104672	---	ENSG00000168386	Q4L180	AF329092	---	---	---	myosin complex	Human Genome U133 Plus 2.0 Array	Affymetrix NetAffx website
1554980_a_at	ATF3	activating transcription factor 3	1q32.3	NM_001030287 /// NM_001040619 /// NM_001674 /// NM_004024	467	460	603148	ENSG00000162772	P18847 /// Q5VTZ2 /// Q5VTZ4 /// Q6ICQ9 /// Q7Z566 /// Q7Z567 /// Q8NG55 /// Q8WYM6	AB066566	<a target="external" href="http://www.wikipathways.org/index.php/Pathway:Homo_sapiens:Hypertrophy_model">Hypertrophy_model</a> /// <a target="external" href="http://www.wikipathways.org/index.php/Pathway:Homo_sapiens:Smooth_muscle_contraction">Smooth_muscle_contraction</a>	transcription /// regulation of transcription, DNA-dependent /// regulation of transcription	DNA binding /// transcription factor activity /// transcription factor activity /// transcription corepressor activity /// protein binding /// identical protein binding /// sequence-specific DNA binding /// protein dimerization activity	nucleus	Human Genome U133 Plus 2.0 Array	Affymetrix NetAffx website
1554997_a_at	PTGS2	prostaglandin-endoperoxide synthase 2 (prostaglandin G/H synthase and cyclooxygenase)	1q25.2-q25.3	NM_000963	5743	196384	600262	ENSG00000073756	A8K802 /// P35354 /// Q6ZYK7 /// Q8IZA9	AY151286	<a target="external" href="http://www.wikipathways.org/index.php/Pathway:Homo_sapiens:Eicosanoid_Synthesis">Eicosanoid_Synthesis</a> /// <a target="external" href="http://www.wikipathways.org/index.php/Pathway:Homo_sapiens:Prostaglandin_synthesis_regulation">Prostaglandin_synthesis_regulation</a>	prostaglandin biosynthetic process /// fatty acid biosynthetic process /// prostaglandin metabolic process /// cell motility /// inflammatory response /// response to oxidative stress /// regulation of blood pressure /// regulation of blood pressure /// negative regulation of cell proliferation /// lipid biosynthetic process /// cyclooxygenase pathway /// anagen /// regulation of inflammatory res…	peroxidase activity /// peroxidase activity /// prostaglandin-endoperoxide synthase activity /// prostaglandin-endoperoxide synthase activity /// prostaglandin-endoperoxide synthase activity /// iron ion binding /// protein binding /// electron donor activity /// oxidoreductase activity /// oxidoreductase activity, acting on single donors with incorporation of molecular oxygen, incorporation of t…	nucleus /// cytoplasm /// cytoplasm /// cytoplasm /// endoplasmic reticulum /// microsome /// membrane /// protein complex	Human Genome U133 Plus 2.0 Array	Affymetrix NetAffx website
1555037_a_at	IDH1	isocitrate dehydrogenase 1 (NADP+), soluble	2q33.3	NM_005896	3417	708001	147700	ENSG00000138413	O75874 /// Q0QER2 /// Q567U4 /// Q6FHQ6 /// Q6FI37 /// Q6FIA4 /// Q7Z3V0	BC012846	---	carbohydrate metabolic process /// glyoxylate cycle /// tricarboxylic acid cycle /// isocitrate metabolic process /// glutathione metabolic process /// response to oxidative stress /// metabolic process	magnesium ion binding /// isocitrate dehydrogenase (NADP+) activity /// isocitrate dehydrogenase (NADP+) activity /// oxidoreductase activity /// oxidoreductase activity, acting on the CH-OH group of donors, NAD or NADP as acceptor /// manganese ion binding /// metal ion binding	cytoplasm /// cytoplasm /// peroxisome /// cytosol /// cytosol	Human Genome U133 Plus 2.0 Array	Affymetrix NetAffx website
1555058_a_at	LPGAT1	lysophosphatidylglycerol acyltransferase 1	1q32	NM_014873	9926	654626	610473	ENSG00000123684	Q53YL2 /// Q92604	BC034621	---	metabolic process /// phospholipid biosynthetic process	acyltransferase activity /// transferase activity	cytoplasm /// endoplasmic reticulum /// endoplasmic reticulum membrane /// membrane /// integral to membrane	Human Genome U133 Plus 2.0 Array	Affymetrix NetAffx website
1555086_at	STAT5B	signal transducer and activator of transcription 5B	17q11.2	NM_012448	6777	632256	245590 /// 604260	---	P51692 /// Q59H39 /// Q8WW55	BC020868	---	luteinization /// natural killer cell differentiation /// transcription /// regulation of transcription, DNA-dependent /// regulation of transcription from RNA polymerase II promoter /// signal transduction /// JAK-STAT cascade /// JAK-STAT cascade /// female pregnancy /// lactation /// positive regulation of cell proliferation /// regulation of steroid metabolic process /// cytokine and chemokin…	DNA binding /// transcription factor activity /// transcription factor activity /// signal transducer activity /// calcium ion binding /// protein binding /// protein binding	nucleus /// cytoplasm	Human Genome U133 Plus 2.0 Array	Affymetrix NetAffx website
1555088_x_at	STAT5B	signal transducer and activator of transcription 5B	17q11.2	NM_012448	6777	632256	245590 /// 604260	---	P51692 /// Q59H39 /// Q8WW55	BC020868	---	luteinization /// natural killer cell differentiation /// transcription /// regulation of transcription, DNA-dependent /// regulation of transcription from RNA polymerase II promoter /// signal transduction /// JAK-STAT cascade /// JAK-STAT cascade /// female pregnancy /// lactation /// positive regulation of cell proliferation /// regulation of steroid metabolic process /// cytokine and chemokin…	DNA binding /// transcription factor activity /// transcription factor activity /// signal transducer activity /// calcium ion binding /// protein binding /// protein binding	nucleus /// cytoplasm	Human Genome U133 Plus 2.0 Array	Affymetrix NetAffx website
1555137_a_at	FGD6	FYVE, RhoGEF and PH domain containing 6	12q22	NM_018351	55785	506381	---	ENSG00000180263	A4FVC4 /// Q6ZV73	BC013319	---	cytoskeleton organization and biogenesis /// regulation of cell shape /// actin cytoskeleton organization and biogenesis /// regulation of Rho protein signal transduction /// regulation of Cdc42 GTPase activity /// filopodium formation	guanyl-nucleotide exchange factor activity /// guanyl-nucleotide exchange factor activity /// Rho guanyl-nucleotide exchange factor activity /// protein binding /// zinc ion binding /// small GTPase binding /// metal ion binding	ruffle /// intracellular /// cytoplasm /// cytoplasm /// Golgi apparatus /// cytoskeleton /// lamellipodium	Human Genome U133 Plus 2.0 Array	Affymetrix NetAffx website
1555167_s_at	NAMPT	nicotinamide phosphoribosyltransferase	7q22.2	NM_005746	10135	489615	608764	ENSG00000105835 /// ENSG00000149962	A4D0Q9 /// A4D0R0 /// A8MU66 /// A8MZ33 /// P43490 /// Q5SYT8 /// Q658Z1	BC020691	---	signal transduction /// cell-cell signaling /// positive regulation of cell proliferation /// pyridine nucleotide biosynthetic process	cytokine activity /// transferase activity /// transferase activity, transferring glycosyl groups /// nicotinamide phosphoribosyltransferase activity	cytoplasm	Human Genome U133 Plus 2.0 Array	Affymetrix NetAffx website
1555173_at	STX19	syntaxin 19	3q11	NM_001001850	415117	679768	---	ENSG00000178750	Q8N4C7	BC034696	---	intracellular protein transport /// vesicle-mediated transport	SNAP receptor activity /// protein binding	membrane	Human Genome U133 Plus 2.0 Array	Affymetrix NetAffx website
1555175_a_at	PBLD	phenazine biosynthesis-like protein domain containing	10pter-q25.3	NM_001033083 /// NM_022129	64081	198158	---	ENSG00000108187	P30039 /// Q8NAD7	BC009738	---	biosynthetic process	catalytic activity /// isomerase activity	---	Human Genome U133 Plus 2.0 Array	Affymetrix NetAffx website
1555181_a_at	ST3GAL3	ST3 beta-galactoside alpha-2,3-sialyltransferase 3	1p34.1	NM_006279 /// NM_174963 /// NM_174964 /// NM_174965 /// NM_174966 /// NM_174967 /// NM_174968 /// NM_174969 /// NM_174970 /// NM_174971	6487	597915	606494	---	Q11203 /// Q96L53	AF425864	---	protein amino acid glycosylation	N-acetyllactosaminide alpha-2,3-sialyltransferase activity /// N-acetyllactosaminide alpha-2,3-sialyltransferase activity /// sialyltransferase activity /// transferase activity /// transferase activity, transferring glycosyl groups	extracellular region /// Golgi apparatus /// membrane /// integral to membrane /// integral to Golgi membrane	Human Genome U133 Plus 2.0 Array	Affymetrix NetAffx website
1555203_s_at	SLC44A4	solute carrier family 44, member 4	6p21.3	NM_025257	80736	335355	606107	---	Q53GD3	AF466766	---	---	---	membrane /// integral to membrane	Human Genome U133 Plus 2.0 Array	Affymetrix NetAffx website
1555229_a_at	C1S	complement component 1, s subcomponent	12p13	NM_001734 /// NM_201442	716	458355	120580	ENSG00000182326	A6NG18 /// A8K2N0 /// P09871 /// Q68D96	BC007010	<a target="external" href="http://www.wikipathways.org/index.php/Pathway:Homo_sapiens:Complement_Activation_Classical">Complement_Activation_Classical</a>	proteolysis /// immune response /// complement activation, classical pathway /// G-protein coupled receptor protein signaling pathway /// innate immune response	rhodopsin-like receptor activity /// complement component C1s activity /// complement component C1s activity /// catalytic activity /// serine-type endopeptidase activity /// calcium ion binding /// peptidase activity /// serine-type peptidase activity /// hydrolase activity /// metal ion binding	extracellular region /// integral to membrane	Human Genome U133 Plus 2.0 Array	Affymetrix NetAffx website
1555240_s_at	GNG12	guanine nucleotide binding protein (G protein), gamma 12	1p31.3	NM_018841	55970	706861	---	ENSG00000172380	Q53GD1 /// Q69YP5 /// Q9UBI6	AF493879	<a target="external" href="http://www.wikipathways.org/index.php/Pathway:Homo_sapiens:Calcium_regulation_in_cardiac_cells">Calcium_regulation_in_cardiac_cells</a> /// <a target="external" href="http://www.wikipathways.org/index.php/Pathway:Homo_sapiens:G_Protein_Signaling">G_Protein_Signaling</a> /// <a target="external" href="http://www.wikipathways.org/index.php/Pathway:Homo_sapiens:Smooth_musc…	signal transduction /// signal transduction /// G-protein coupled receptor protein signaling pathway	signal transducer activity	heterotrimeric G-protein complex /// plasma membrane /// membrane	Human Genome U133 Plus 2.0 Array	Affymetrix NetAffx website
1555247_a_at	RAPGEF6	Rap guanine nucleotide exchange factor (GEF) 6	5q31.1	NM_016340	51735	483329	610499	ENSG00000158987	A3KN82 /// A5PLL6 /// O43386 /// Q68DF6 /// Q8TEA3 /// Q8TEU7 /// Q8TF40 /// Q9UHV4	AF394782	---	signal transduction /// small GTPase mediated signal transduction /// Ras protein signal transduction /// regulation of GTPase activity /// regulation of small GTPase mediated signal transduction	guanyl-nucleotide exchange factor activity /// guanyl-nucleotide exchange factor activity /// guanyl-nucleotide exchange factor activity /// protein binding /// Ras GTPase binding /// GTP-dependent protein binding /// GTP-dependent protein binding	intracellular /// cytoplasm /// plasma membrane /// plasma membrane /// plasma membrane /// membrane	Human Genome U133 Plus 2.0 Array	Affymetrix NetAffx website
1555272_at	LOC728194	radial spoke head 10 homolog B (Chlamydomonas)-like	7p22.1	NM_001099697	728194	710326	---	---	A6NMW7	BC044242	---	---	---	---	Human Genome U133 Plus 2.0 Array	Affymetrix NetAffx website
1555274_a_at	SELI	selenoprotein I	2p23.3	NM_033505	85465	189073	607915	ENSG00000138018	A8MST7 /// Q8WU57 /// Q9C0D9	BC021229	---	phospholipid biosynthetic process	magnesium ion binding /// ethanolaminephosphotransferase activity /// selenium binding /// transferase activity /// phosphotransferase activity, for other substituted phosphate groups /// manganese ion binding /// metal ion binding	membrane /// integral to membrane	Human Genome U133 Plus 2.0 Array	Affymetrix NetAffx website
1555278_a_at	CKAP5	cytoskeleton associated protein 5	11p11.2	NM_001008938 /// NM_014756	9793	201253	611142	ENSG00000175216	Q05D70 /// Q0VAX7 /// Q0VAX8 /// Q14008 /// Q2TA89 /// Q6NSH4 /// Q8IYN5 /// Q8NAH3	BC035554	---	establishment and/or maintenance of microtubule cytoskeleton polarity /// RNA transport /// centrosome organization and biogenesis /// spindle pole body organization and biogenesis	binding /// protein binding	gamma-tubulin complex /// centrosome /// microtubule cytoskeleton	Human Genome U133 Plus 2.0 Array	Affymetrix NetAffx website
1555326_a_at	ADAM9	ADAM metallopeptidase domain 9 (meltrin gamma)	8p11.23	NM_001005845 /// NM_003816	8754	591852	602713	ENSG00000168615	A0AVL1 /// Q13443	AF495383	---	proteolysis /// protein kinase cascade	metalloendopeptidase activity /// integrin binding /// protein binding /// peptidase activity /// metallopeptidase activity /// metallopeptidase activity /// metallopeptidase activity /// zinc ion binding /// hydrolase activity /// SH3 domain binding /// protein kinase binding /// metal ion binding	extracellular region /// plasma membrane /// integral to plasma membrane /// membrane /// integral to membrane /// integral to membrane	Human Genome U133 Plus 2.0 Array	Affymetrix NetAffx website
1555334_s_at	SLC30A5	solute carrier family 30 (zinc transporter), member 5	5q12.1	NM_022902 /// NM_024055	64924	631975	607819	ENSG00000145740	Q8TAD4 /// Q9BTR6 /// Q9BVY8 /// Q9BY48 /// Q9H9X0	AF439324	---	transport /// ion transport /// cation transport /// cobalt ion transport /// zinc ion transport /// zinc ion transport /// cellular zinc ion homeostasis /// response to zinc ion /// regulation of proton transport	zinc ion transmembrane transporter activity /// zinc ion binding /// zinc ion binding /// cation transmembrane transporter activity	membrane fraction /// membrane fraction /// Golgi apparatus /// Golgi apparatus /// integral to plasma membrane /// membrane /// integral to membrane /// apical plasma membrane /// secretory granule	Human Genome U133 Plus 2.0 Array	Affymetrix NetAffx website
1555349_a_at	ITGB2	integrin, beta 2 (complement component 3 receptor 3 and 4 subunit)	21q22.3	NM_000211	3689	375957	116920 /// 600065	ENSG00000160255	A8MVG7 /// A8MYE6 /// P05107 /// Q53HS5 /// Q59H50 /// Q6PJ75 /// Q8N1L0 /// Q8WWJ8 /// Q96PT7 /// Q9UD72	L78790	<a target="external" href="http://www.wikipathways.org/index.php/Pathway:Homo_sapiens:Integrin-mediated_cell_adhesion_KEGG">Integrin-mediated_cell_adhesion_KEGG</a>	apoptosis /// inflammatory response /// cell adhesion /// cell adhesion /// leukocyte adhesion /// cell-matrix adhesion /// integrin-mediated signaling pathway /// integrin-mediated signaling pathway /// integrin-mediated signaling pathway /// cell-cell signaling /// multicellular organismal development /// regulation of cell shape /// neutrophil chemotaxis /// regulation of peptidyl-tyrosine pho…	receptor activity /// binding /// protein binding /// protein binding /// protein kinase binding	integrin complex /// integrin complex /// integrin complex /// membrane /// integral to membrane	Human Genome U133 Plus 2.0 Array	Affymetrix NetAffx website
1555355_a_at	ETS1	v-ets erythroblastosis virus E26 oncogene homolog 1 (avian)	11q23.3	NM_005238	2113	369438	164720	ENSG00000134954	A8K725 /// A9UL17 /// P14921 /// Q5U0M2 /// Q6FG54 /// Q6N087 /// Q96AC5	BC017314	---	transcription /// regulation of transcription, DNA-dependent /// immune response /// negative regulation of cell proliferation /// positive regulation of erythrocyte differentiation	DNA binding /// DNA binding /// DNA binding /// transcription factor activity /// protein binding /// protein binding /// transcription factor binding /// sequence-specific DNA binding	nucleus	Human Genome U133 Plus 2.0 Array	Affymetrix NetAffx website
1555372_at	BCL2L11	BCL2-like 11 (apoptosis facilitator)	2q13	NM_006538 /// NM_138621 /// NM_207002	10018	469658	603827	---	A8K2W2 /// O43521 /// Q0MSE8 /// Q53R28 /// Q6JTU6 /// Q6V402 /// Q8WXB2 /// Q8WYL6 /// Q8WYL8	AF455755	<a target="external" href="http://www.wikipathways.org/index.php/Pathway:Homo_sapiens:Apoptosis">Apoptosis</a>	apoptosis /// induction of apoptosis /// positive regulation of apoptosis	protein binding	membrane fraction /// membrane	Human Genome U133 Plus 2.0 Array	Affymetrix NetAffx website
1555383_a_at	POF1B	premature ovarian failure, 1B	Xq21.1-q21.2	NM_024921	79983	267038	300603 /// 300604	ENSG00000124429	A8K2U5 /// A8MVC4 /// Q6ZR31 /// Q8WVV4	BC017500	---	---	actin binding	---	Human Genome U133 Plus 2.0 Array	Affymetrix NetAffx website
1555384_a_at	LARP4	La ribonucleoprotein domain family, member 4	12q13.13	NM_052879 /// NM_199188 /// NM_199190	113251	696260	---	ENSG00000161813	A8K6T1 /// Q6P4E2 /// Q6ZV14 /// Q71RC2 /// Q8TBL5 /// Q8WVX5 /// Q96J85	BC022377	---	---	nucleic acid binding /// RNA binding	ribonucleoprotein complex	Human Genome U133 Plus 2.0 Array	Affymetrix NetAffx website
1555419_a_at	ASAH1	N-acylsphingosine amidohydrolase (acid ceramidase) 1	8p22-p21.3	NM_004315 /// NM_177924	427	527412	228000	ENSG00000104763	A8K0B6 /// Q13510 /// Q53H01 /// Q6W898 /// Q96AS2	BC016828	<a target="external" href="http://www.wikipathways.org/index.php/Pathway:Homo_sapiens:S1P_Signaling">S1P_Signaling</a>	fatty acid metabolic process /// ceramide metabolic process /// response to organic substance /// carboxylic acid metabolic process /// lung development	catalytic activity /// hydrolase activity /// ceramidase activity /// transferase activity, transferring acyl groups, acyl groups converted into alkyl on transfer	lysosome	Human Genome U133 Plus 2.0 Array	Affymetrix NetAffx website
1555426_a_at	OTUD5	OTU domain containing 5	Xp11.23	NM_017602	55593	496098	300713	ENSG00000068308	Q96G74	BC028225	---	---	---	---	Human Genome U133 Plus 2.0 Array	Affymetrix NetAffx website
1555427_s_at	SYNCRIP	synaptotagmin binding, cytoplasmic RNA interacting protein	6q14-q15	NM_006372	10492	571177	---	ENSG00000135316	O60506 /// Q05CK9 /// Q59GL1 /// Q5TCG1 /// Q5TCG3	AY034482	---	RNA processing /// mRNA processing /// RNA splicing /// RNA splicing	nucleotide binding /// nucleic acid binding /// RNA binding /// RNA binding /// protein binding /// poly(A) binding	nucleus /// nucleus /// spliceosome /// cytoplasm /// endoplasmic reticulum /// microsome /// ribonucleoprotein complex /// ribonucleoprotein complex	Human Genome U133 Plus 2.0 Array	Affymetrix NetAffx website
1555434_a_at	SLC39A14	solute carrier family 39 (zinc transporter), member 14	8p21.3	NM_015359	23516	491232	608736	ENSG00000104635	Q15043	BC015770	---	transport /// ion transport /// zinc ion transport /// metal ion transport	zinc ion binding /// metal ion transmembrane transporter activity	membrane /// integral to membrane	Human Genome U133 Plus 2.0 Array	Affymetrix NetAffx website
1555460_a_at	SLC39A6	solute carrier family 39 (zinc transporter), member 6	18q12.2	NM_001099406 /// NM_012319	25800	79136	608731	ENSG00000141424	Q13433	BC039498	---	transport /// ion transport /// zinc ion transport /// metal ion transport	zinc ion binding /// metal ion transmembrane transporter activity	endoplasmic reticulum /// plasma membrane /// membrane /// integral to membrane	Human Genome U133 Plus 2.0 Array	Affymetrix NetAffx website
1555465_at	MCOLN2	mucolipin 2	1p22	NM_153259	255231	591446	607399	ENSG00000153898	Q2M3I6 /// Q5TAG5 /// Q8IZK6	AY083533	---	transport /// ion transport	ion channel activity	membrane /// integral to membrane	Human Genome U133 Plus 2.0 Array	Affymetrix NetAffx website
1555483_x_at	FBLIM1	filamin binding LIM protein 1	1p36.21	NM_001024215 /// NM_001024216 /// NM_017556	54751	530101	607747	---	Q8WUP2	AF459643	---	cell adhesion /// regulation of cell shape	protein binding /// zinc ion binding /// metal ion binding	cytoplasm /// cytoskeleton /// cell junction	Human Genome U133 Plus 2.0 Array	Affymetrix NetAffx website
1555486_a_at	FLJ14213	protor-2	11p13-p12	NM_024841	79899	19987	611728	ENSG00000135362	Q6MZQ0	BC008922	---	---	---	---	Human Genome U133 Plus 2.0 Array	Affymetrix NetAffx website
1555495_a_at	SDCCAG10	serologically defined colon cancer antigen 10	5q12.3	NM_005869	10283	371372	---	ENSG00000153015	Q6UX04	BC012117	---	protein folding	peptidyl-prolyl cis-trans isomerase activity /// isomerase activity	---	Human Genome U133 Plus 2.0 Array	Affymetrix NetAffx website
1555526_a_at	SEPT6	septin 6	Xq24	NM_015129 /// NM_145799 /// NM_145800 /// NM_145802	23157	496666	300683	ENSG00000125354	B1AMS2 /// Q14141 /// Q541S4 /// Q548C9 /// Q6B514 /// Q6NT82 /// Q8NFH9 /// Q8NFI0 /// Q8NFI2	AF403061	---	cytokinesis /// cell cycle /// cell division	nucleotide binding /// protein binding /// protein binding /// protein binding /// GTP binding /// GTP binding	septin complex	Human Genome U133 Plus 2.0 Array	Affymetrix NetAffx website
1555543_a_at	CLCC1	chloride channel CLIC-like 1	1p13.3	NM_001048210 /// NM_015127	23155	658489	---	ENSG00000121940	Q5T1P5 /// Q96S66	AB052917	---	---	---	nucleus /// endoplasmic reticulum /// Golgi apparatus /// membrane /// integral to membrane	Human Genome U133 Plus 2.0 Array	Affymetrix NetAffx website
1555564_a_at	CFI	complement factor I	4q25	NM_000204	3426	312485	217030	ENSG00000205403	A8K3L0 /// P05156 /// Q6LAM0 /// Q6LAM1 /// Q8WW88	BC020718	---	proteolysis /// immune response /// complement activation, classical pathway /// innate immune response	complement factor I activity /// complement factor I activity /// catalytic activity /// serine-type endopeptidase activity /// serine-type endopeptidase activity /// scavenger receptor activity /// peptidase activity /// hydrolase activity	extracellular region /// extracellular region /// membrane	Human Genome U133 Plus 2.0 Array	Affymetrix NetAffx website
1555565_s_at	TAPBP	TAP binding protein (tapasin)	6p21.3	NM_003190 /// NM_172208 /// NM_172209	6892	370937	601962 /// 604571	ENSG00000112493 /// ENSG00000206208 /// ENSG00000206281	A2AB90 /// A2AB91 /// A2AB92 /// A2ABB9 /// A2ABC0 /// A8MUD0 /// A8MUH0 /// O15533 /// Q5HYV0 /// Q6P1N7	AF314222	---	protein complex assembly /// retrograde vesicle-mediated transport, Golgi to ER /// immune response /// antigen processing and presentation of endogenous peptide antigen via MHC class I /// peptide antigen stabilization	protein binding /// protein binding /// peptide antigen-transporting ATPase activity /// MHC class I protein binding /// peptide antigen binding /// TAP1 binding /// TAP2 binding /// unfolded protein binding	Golgi membrane /// endoplasmic reticulum /// endoplasmic reticulum /// endoplasmic reticulum membrane /// endoplasmic reticulum membrane /// microsome /// microsome /// membrane /// integral to membrane /// integral to membrane /// MHC class I peptide loading complex	Human Genome U133 Plus 2.0 Array	Affymetrix NetAffx website
1555579_s_at	PTPRM	protein tyrosine phosphatase, receptor type, M	18p11.2	NM_001105244 /// NM_002845	5797	49774	176888	ENSG00000173482	A7MBN1 /// P28827 /// Q49AC9 /// Q86V60	BC029442	---	protein amino acid dephosphorylation /// protein amino acid dephosphorylation /// cell adhesion /// dephosphorylation	phosphoprotein phosphatase activity /// protein tyrosine phosphatase activity /// receptor activity /// transmembrane receptor protein tyrosine phosphatase activity /// protein binding /// hydrolase activity /// phosphoric monoester hydrolase activity	integral to plasma membrane /// membrane /// integral to membrane	Human Genome U133 Plus 2.0 Array	Affymetrix NetAffx website
1555594_a_at	MBNL1	muscleblind-like (Drosophila)	3q25	NM_021038 /// NM_207292 /// NM_207293 /// NM_207294 /// NM_207295 /// NM_207296 /// NM_207297	4154	478000	606516	ENSG00000152601	Q68DD0 /// Q86UV8 /// Q86UV9 /// Q86VM6 /// Q96P92 /// Q96RE3 /// Q9BS62 /// Q9NR56	AF401998	---	in utero embryonic development /// nervous system development /// muscle development /// embryonic limb morphogenesis /// myoblast differentiation	nucleic acid binding /// RNA binding /// double-stranded RNA binding /// zinc ion binding /// metal ion binding	nucleus /// nucleus /// cytoplasm	Human Genome U133 Plus 2.0 Array	Affymetrix NetAffx website
1555613_a_at	ZAP70	zeta-chain (TCR) associated protein kinase 70kDa	2q12	NM_001079 /// NM_207519	7535	234569	176947	ENSG00000115085	P43403	AB083211	<a target="external" href="http://www.wikipathways.org/index.php/Pathway:Homo_sapiens:Inflammatory_Response_Pathway">Inflammatory_Response_Pathway</a>	protein amino acid phosphorylation /// protein amino acid phosphorylation /// immune response /// signal transduction /// protein kinase cascade /// positive thymic T cell selection /// positive regulation of T cell differentiation	nucleotide binding /// protein kinase activity /// protein tyrosine kinase activity /// protein tyrosine kinase activity /// non-membrane spanning protein tyrosine kinase activity /// protein binding /// protein binding /// ATP binding /// ATP binding /// kinase activity /// transferase activity	cytoplasm /// cytoplasm /// T cell receptor complex	Human Genome U133 Plus 2.0 Array	Affymetrix NetAffx website
1555630_a_at	RAB34	RAB34, member RAS oncogene family	17q11.2	NM_031934	83871	301853	610917	ENSG00000109113	A8MYQ9 /// Q6NXT3 /// Q96PJ7 /// Q9BZG1	AF327350	---	transport /// small GTPase mediated signal transduction /// protein transport	nucleotide binding /// GTP binding	cytoplasm /// Golgi apparatus	Human Genome U133 Plus 2.0 Array	Affymetrix NetAffx website
1555638_a_at	SAMSN1	SAM domain, SH3 domain and nuclear localization signals 1	21q11	NM_022136	64092	570423	607978	ENSG00000155307	A6NI78 /// A6NJW8 /// Q9NSI8	AF519621	---	---	phosphotyrosine binding	---	Human Genome U133 Plus 2.0 Array	Affymetrix NetAffx website
1555679_a_at	RTN4IP1	reticulon 4 interacting protein 1	6q21	NM_032730	84816	155839	610502	ENSG00000130347	Q8WWV3 /// Q96RL8	AF439711	---	metabolic process	catalytic activity /// binding /// zinc ion binding /// oxidoreductase activity	mitochondrion	Human Genome U133 Plus 2.0 Array	Affymetrix NetAffx website
1555680_a_at	SMOX	spermine oxidase	20p13	NM_175839 /// NM_175840 /// NM_175841 /// NM_175842	54498	433337	---	ENSG00000088826	A2A2P5 /// A2A2P6 /// A8BE87 /// Q9NWM0	AY033891	---	---	electron carrier activity /// oxidoreductase activity	cytoplasm	Human Genome U133 Plus 2.0 Array	Affymetrix NetAffx website
1555705_a_at	CMTM3	CKLF-like MARVEL transmembrane domain containing 3	16q21-q22.1	NM_001048251 /// NM_144601 /// NM_181553 /// NM_181554	123920	298198	607886	ENSG00000140931	Q96MX0	AY166714	---	chemotaxis	cytokine activity	extracellular space /// membrane /// integral to membrane	Human Genome U133 Plus 2.0 Array	Affymetrix NetAffx website
1555716_a_at	CXADR	coxsackie virus and adenovirus receptor	21q21.1	NM_001338	1525	705503	602621	ENSG00000154639	A8MWT9 /// P78310	AY072911	---	cell adhesion	receptor activity /// receptor activity /// protein binding	extracellular region /// plasma membrane /// plasma membrane /// plasma membrane /// integral to plasma membrane /// tight junction /// membrane /// integral to membrane /// basolateral plasma membrane /// cell junction	Human Genome U133 Plus 2.0 Array	Affymetrix NetAffx website
1555724_s_at	TAGLN	transgelin	11q23.2	NM_001001522 /// NM_003186	6876	632099	600818	ENSG00000149591	Q01995 /// Q53GC9 /// Q59FA5 /// Q5U0D2 /// Q6FI52 /// Q96FG7	BC010946	---	muscle development /// muscle development	actin binding /// protein binding	cytoplasm	Human Genome U133 Plus 2.0 Array	Affymetrix NetAffx website
1555725_a_at	RGS5	regulator of G-protein signaling 5	1q23.1	NM_003617	8490	709381	145500 /// 603276	ENSG00000143248	B1APM2 /// O15539 /// Q53XA9 /// Q599J0 /// Q7LCP5 /// Q9H3F2	AF493929	<a target="external" href="http://www.wikipathways.org/index.php/Pathway:Homo_sapiens:Calcium_regulation_in_cardiac_cells">Calcium_regulation_in_cardiac_cells</a> /// <a target="external" href="http://www.wikipathways.org/index.php/Pathway:Homo_sapiens:Smooth_muscle_contraction">Smooth_muscle_contraction</a>	regulation of G-protein coupled receptor protein signaling pathway /// negative regulation of signal transduction	signal transducer activity /// GTPase activator activity	---	Human Genome U133 Plus 2.0 Array	Affymetrix NetAffx website
1555728_a_at	MS4A4A	membrane-spanning 4-domains, subfamily A, member 4	11q12	NM_024021 /// NM_148975	51338	325960	606547	ENSG00000110079	A8K7S4 /// Q4JF27 /// Q96JQ5	AF354928	---	signal transduction	receptor activity	membrane /// integral to membrane	Human Genome U133 Plus 2.0 Array	Affymetrix NetAffx website
1555745_a_at	LYZ	lysozyme (renal amyloidosis)	12q15	NM_000239	4069	706744	105200 /// 153450	ENSG00000090382	P61626	U25677	---	inflammatory response /// metabolic process /// cell wall catabolic process /// cytolysis /// defense response to bacterium	lysozyme activity /// lysozyme activity /// catalytic activity /// protein binding /// hydrolase activity /// hydrolase activity, acting on glycosyl bonds	extracellular region /// extracellular space	Human Genome U133 Plus 2.0 Array	Affymetrix NetAffx website
1555751_a_at	GEMIN7	gem (nuclear organelle) associated protein 7	19q13.32	NM_001007269 /// NM_001007270 /// NM_024707	79760	466919	607419	ENSG00000142252	Q6IA34 /// Q9H840	AY114106	---	spliceosomal snRNP biogenesis /// nuclear mRNA splicing, via spliceosome /// mRNA processing /// RNA splicing	protein binding	nucleus /// nucleoplasm /// spliceosome /// cytoplasm /// cytoplasm /// nuclear body	Human Genome U133 Plus 2.0 Array	Affymetrix NetAffx website
1555756_a_at	CLEC7A	C-type lectin domain family 7, member A	12p13.2	NM_022570 /// NM_197947 /// NM_197948 /// NM_197949 /// NM_197950 /// NM_197954	64581	143929	606264	ENSG00000172243	Q68D78 /// Q96D32 /// Q96PA4 /// Q9BXN2	AF400600	---	phagocytosis, recognition /// inflammatory response /// immune response /// cell recognition /// carbohydrate mediated signaling /// T cell activation /// defense response to protozoan /// innate immune response	receptor activity /// binding /// sugar binding /// sugar binding /// pattern recognition receptor activity /// MHC protein binding	cytoplasm /// membrane /// integral to membrane /// integral to membrane	Human Genome U133 Plus 2.0 Array	Affymetrix NetAffx website
1555758_a_at	CDKN3	cyclin-dependent kinase inhibitor 3 (CDK2-associated dual specificity phosphatase)	14q22	NM_005192	1033	84113	123832	ENSG00000100526	A8MT50 /// Q16667 /// Q3SYQ4 /// Q53ZU6 /// Q5U0M4 /// Q6P1N8 /// Q86SK4 /// Q86SK7 /// Q86SK8 /// Q9BPV5 /// Q9BY34 /// Q9C043 /// Q9C044 /// Q9C045 /// Q9C046 /// Q9C048 /// Q9C050	AF213040	---	regulation of cyclin-dependent protein kinase activity /// G1/S transition of mitotic cell cycle /// cell cycle /// cell cycle arrest /// negative regulation of cell proliferation /// dephosphorylation	phosphoprotein phosphatase activity /// protein tyrosine phosphatase activity /// protein binding /// protein tyrosine/serine/threonine phosphatase activity /// kinase activity /// hydrolase activity /// phosphoric monoester hydrolase activity	---	Human Genome U133 Plus 2.0 Array	Affymetrix NetAffx website
1555759_a_at	CCL5	chemokine (C-C motif) ligand 5	17q11.2-q12	NM_002985	6352	514821	187011	ENSG00000161570	P13501 /// Q0QVW8	AF043341	---	cellular calcium ion homeostasis /// exocytosis /// cell motility /// chemotaxis /// chemotaxis /// inflammatory response /// inflammatory response /// immune response /// immune response /// cellular defense response /// response to oxidative stress /// cell adhesion /// signal transduction /// cell-cell signaling /// response to virus /// negative regulation of viral genome replication	signal transducer activity /// receptor binding /// cytokine activity /// chemokine activity /// chemokine activity /// chemoattractant activity	extracellular region /// extracellular space	Human Genome U133 Plus 2.0 Array	Affymetrix NetAffx website
1555762_s_at	RBM15	RNA binding motif protein 15	1p13	NM_022768	64783	435947	606077	ENSG00000162775	A1A693 /// A8MX79 /// Q3ZAU1 /// Q3ZB86 /// Q4V760 /// Q59EY1 /// Q86VW9 /// Q96T37	AF364036	---	regulation of transcription	nucleotide binding /// nucleic acid binding /// RNA binding /// binding	nucleus	Human Genome U133 Plus 2.0 Array	Affymetrix NetAffx website
1555778_a_at	POSTN	periostin, osteoblast specific factor	13q13.3	NM_006475	10631	136348	608777	ENSG00000133110	Q15063 /// Q29XZ0 /// Q3KPJ5	AY140646	---	skeletal development /// cell adhesion /// cell adhesion	protein binding /// heparin binding /// heparin binding	extracellular region /// proteinaceous extracellular matrix /// proteinaceous extracellular matrix	Human Genome U133 Plus 2.0 Array	Affymetrix NetAffx website
1555779_a_at	CD79A	CD79a molecule, immunoglobulin-associated alpha	19q13.2	NM_001783 /// NM_021601	973	631567	112205	ENSG00000105369	A0N775 /// P11912	M74721	---	immune response /// cell surface receptor linked signal transduction /// B cell differentiation /// B cell differentiation /// B cell proliferation /// B cell proliferation /// B cell activation /// B cell receptor signaling pathway /// B cell receptor signaling pathway	transmembrane receptor activity /// protein binding /// protein binding	multivesicular body /// multivesicular body /// plasma membrane /// external side of plasma membrane /// external side of plasma membrane /// membrane /// integral to membrane /// B cell receptor complex /// B cell receptor complex /// membrane raft /// membrane raft	Human Genome U133 Plus 2.0 Array	Affymetrix NetAffx website
1555786_s_at	CUEDC1	CUE domain containing 1	17q23.2	NM_017949	404093	46679	---	---	Q6AHX0 /// Q9NWM3	BC008034	---	---	---	---	Human Genome U133 Plus 2.0 Array	Affymetrix NetAffx website
1555790_a_at	ZNF320 /// TMEM192	zinc finger protein 320 /// transmembrane protein 192	19q13.41 /// 4q32.3	NM_001100389 /// NM_207333	162967 /// 201931	708090	606427	ENSG00000170088	A2RRD8 /// Q6ZP55 /// Q8IY95	BC036301	---	transcription /// regulation of transcription, DNA-dependent	nucleic acid binding /// DNA binding /// zinc ion binding /// metal ion binding	intracellular /// nucleus /// membrane /// integral to membrane	Human Genome U133 Plus 2.0 Array	Affymetrix NetAffx website
1555797_a_at	ARPC5	actin related protein 2/3 complex, subunit 5, 16kDa	1q25.3	NM_005717	10092	703792	604227	ENSG00000162704	A6NEC4 /// O15511 /// Q6IPM3	AF017807	---	cell motility /// actin cytoskeleton organization and biogenesis /// regulation of actin filament polymerization	actin binding /// structural constituent of cytoskeleton /// protein binding	cytoplasm /// cytoplasm /// cytoskeleton /// Arp2/3 protein complex /// actin cytoskeleton /// lamellipodium /// cell projection	Human Genome U133 Plus 2.0 Array	Affymetrix NetAffx website
1555803_a_at	C11orf57	chromosome 11 open reading frame 57	11q23.1	NM_001082969 /// NM_001082970 /// NM_018195	55216	195060	---	ENSG00000150776	Q6ZUT1 /// Q9NVH7	BC030546	---	---	---	---	Human Genome U133 Plus 2.0 Array	Affymetrix NetAffx website
1555811_at	ARHGDIB	Rho GDP dissociation inhibitor (GDI) beta	12p12.3	NM_001175	397	504877	602843	ENSG00000111348	P52566	AF498927	<a target="external" href="http://www.wikipathways.org/index.php/Pathway:Homo_sapiens:G13_Signaling_Pathway">G13_Signaling_Pathway</a>	cell motility /// immune response /// negative regulation of cell adhesion /// Rho protein signal transduction /// multicellular organismal development /// actin cytoskeleton organization and biogenesis	Rho GDP-dissociation inhibitor activity /// Rho GDP-dissociation inhibitor activity /// GTPase activator activity /// protein binding	cytoplasm /// cytoplasm /// cytoskeleton /// cytoplasmic membrane-bounded vesicle	Human Genome U133 Plus 2.0 Array	Affymetrix NetAffx website
1555812_a_at	ARHGDIB	Rho GDP dissociation inhibitor (GDI) beta	12p12.3	NM_001175	397	504877	602843	ENSG00000111348	P52566	AF498927	<a target="external" href="http://www.wikipathways.org/index.php/Pathway:Homo_sapiens:G13_Signaling_Pathway">G13_Signaling_Pathway</a>	cell motility /// immune response /// negative regulation of cell adhesion /// Rho protein signal transduction /// multicellular organismal development /// actin cytoskeleton organization and biogenesis	Rho GDP-dissociation inhibitor activity /// Rho GDP-dissociation inhibitor activity /// GTPase activator activity /// protein binding	cytoplasm /// cytoplasm /// cytoskeleton /// cytoplasmic membrane-bounded vesicle	Human Genome U133 Plus 2.0 Array	Affymetrix NetAffx website
1555829_at	FAM62B	family with sequence similarity 62 (C2 domain containing) member B	7q36.3	NM_020728	57488	490795	---	---	A0FGR8	BC001224	---	---	---	plasma membrane /// membrane /// integral to membrane	Human Genome U133 Plus 2.0 Array	Affymetrix NetAffx website
1555842_at	LOC284356	hypothetical LOC284356	19q13.33	---	284356	588994	---	---	Q8WYS2	BM978026	---	---	---	---	Human Genome U133 Plus 2.0 Array	Affymetrix NetAffx website
1555847_a_at	LOC284454	hypothetical protein LOC284454	19p13.13	---	284454	436426	---	---	---	BU617052	---	---	---	---	Human Genome U133 Plus 2.0 Array	Affymetrix NetAffx website
1555851_s_at	SEPW1	selenoprotein W, 1	19q13.3	NM_003009	6415	631549	603235	ENSG00000178980	A8MRR7 /// A8MZ64 /// P63302	AW514401	---	cell redox homeostasis	selenium binding	cytoplasm /// cytoplasm	Human Genome U133 Plus 2.0 Array	Affymetrix NetAffx website
1555852_at	---	---	---	---	---	---	---	---	---	AI375915	---	---	---	---	Human Genome U133 Plus 2.0 Array	Affymetrix NetAffx website
1555864_s_at	PDHA1	pyruvate dehydrogenase (lipoamide) alpha 1	Xp22.2-p22.1	NM_000284	5160	530331	300502 /// 308930 /// 312170	ENSG00000131828	A5YPB6 /// A5YVE9 /// P08559 /// P78557 /// Q15994 /// Q53GE3 /// Q53H41 /// Q5JPT8 /// Q5JPT9 /// Q5JPU0 /// Q5JPU1 /// Q5JPU2 /// Q5JPU3 /// Q6LCA3 /// Q99724 /// Q99725 /// Q9UNV7	AW057819	<a target="external" href="http://www.wikipathways.org/index.php/Pathway:Homo_sapiens:Acetylcholine_Synthesis">Acetylcholine_Synthesis</a> /// <a target="external" href="http://www.wikipathways.org/index.php/Pathway:Homo_sapiens:Glycolysis_and_Gluconeogenesis">Glycolysis_and_Gluconeogenesis</a> /// <a target="external" href="http://www.wikipathways.org/index.php/Pathway:Homo_sapiens:Krebs-TCA_Cyc…	acetyl-CoA metabolic process /// glycolysis /// metabolic process	pyruvate dehydrogenase (acetyl-transferring) activity /// protein binding /// oxidoreductase activity /// oxidoreductase activity, acting on the aldehyde or oxo group of donors, disulfide as acceptor	mitochondrion /// mitochondrion /// mitochondrial matrix	Human Genome U133 Plus 2.0 Array	Affymetrix NetAffx website
1555878_at	RPS24	Ribosomal protein S24	10q22-q23	NM_001026 /// NM_033022	6229	356794	602412 /// 610629	---	P62847 /// Q7Z3D1	AK094613	<a target="external" href="http://www.wikipathways.org/index.php/Pathway:Mus_musculus:mRNA_processing_binding_Reactome">mRNA_processing_binding_Reactome</a> /// <a target="external" href="http://www.wikipathways.org/index.php/Pathway:Homo_sapiens:Ribosomal_Proteins">Ribosomal_Proteins</a> /// <a target="external" href="http://www.wikipathways.org/index.php/Pathway:Mus_musculus:Ribosomal_Proteins"…	translation /// translation	nucleotide binding /// RNA binding /// structural constituent of ribosome /// structural constituent of ribosome /// structural constituent of ribosome	intracellular /// ribosome /// small ribosomal subunit /// cytosolic small ribosomal subunit /// ribonucleoprotein complex	Human Genome U133 Plus 2.0 Array	Affymetrix NetAffx website
1555889_a_at	CRTAP	cartilage associated protein	3p22.3	NM_006371	10491	517888	605497 /// 610682 /// 610854	ENSG00000170275	O75718 /// Q8NB01	BQ876971	---	---	---	extracellular region /// proteinaceous extracellular matrix	Human Genome U133 Plus 2.0 Array	Affymetrix NetAffx website
1555913_at	GON4L	gon-4-like (C. elegans)	1q22	NM_001037533 /// NM_032292	54856	656361	610393	ENSG00000116580	A4PB67 /// A4PB68 /// A4PBF6 /// Q14BN2 /// Q14C93 /// Q1ED43 /// Q3T8J9 /// Q53GT0 /// Q6IPZ3 /// Q6PHZ4 /// Q8N7A2 /// Q9H5U2 /// Q9H986 /// Q9NXJ9	AK098734	---	regulation of transcription, DNA-dependent	DNA binding	nucleus	Human Genome U133 Plus 2.0 Array	Affymetrix NetAffx website
1555935_s_at	HUNK	hormonally upregulated Neu-associated kinase	21q22.1	NM_014586	30811	109437	606532	ENSG00000142149	P57058	T58129	---	protein amino acid phosphorylation /// signal transduction /// multicellular organismal development	nucleotide binding /// protein kinase activity /// protein serine/threonine kinase activity /// protein serine/threonine kinase activity /// ATP binding /// kinase activity /// transferase activity	---	Human Genome U133 Plus 2.0 Array	Affymetrix NetAffx website
1555945_s_at	FAM120A	family with sequence similarity 120A	9q22.31	NM_014612	23196	372003	---	ENSG00000048828	Q86V69 /// Q8NAZ6 /// Q9NZB2	AK091785	---	DNA repair	nuclease activity	---	Human Genome U133 Plus 2.0 Array	Affymetrix NetAffx website
1555948_s_at	FAM120A	family with sequence similarity 120A	9q22.31	NM_014612	23196	372003	---	ENSG00000048828	Q86V69 /// Q8NAZ6 /// Q9NZB2	AU116818	---	DNA repair	nuclease activity	---	Human Genome U133 Plus 2.0 Array	Affymetrix NetAffx website
1555950_a_at	CD55	CD55 molecule, decay accelerating factor for complement (Cromer blood group)	1q32	NM_000574 /// NM_001114752	1604	527653	125240	ENSG00000196352	B1AP14 /// B1AP15 /// P08174 /// Q14UF2 /// Q14UF3 /// Q14UF4 /// Q14UF5 /// Q14UF6 /// Q76N74 /// Q8TD11 /// Q8TD12 /// Q8TD13 /// Q8TD14	CA448665	<a target="external" href="http://www.wikipathways.org/index.php/Pathway:Homo_sapiens:Complement_Activation_Classical">Complement_Activation_Classical</a>	immune response /// complement activation, classical pathway /// elevation of cytosolic calcium ion concentration /// innate immune response /// respiratory burst	---	soluble fraction /// plasma membrane /// integral to plasma membrane /// membrane /// anchored to membrane /// membrane raft	Human Genome U133 Plus 2.0 Array	Affymetrix NetAffx website
1555960_at	HINT1	histidine triad nucleotide binding protein 1	5q31.2	NM_005340	3094	483305	601314	---	P49773	AK054976	---	signal transduction	catalytic activity /// protein kinase C binding /// zinc ion binding /// hydrolase activity	nucleus /// nucleus /// cytoplasm /// cytoskeleton	Human Genome U133 Plus 2.0 Array	Affymetrix NetAffx website
1555962_at	B3GNT7	UDP-GlcNAc:betaGal beta-1,3-N-acetylglucosaminyltransferase 7	2q37.1	NM_145236	93010	299329	---	ENSG00000156966	Q8NFL0	CA503291	---	protein amino acid glycosylation	galactosyltransferase activity /// transferase activity /// transferase activity, transferring glycosyl groups	Golgi membrane /// Golgi apparatus /// membrane /// integral to membrane	Human Genome U133 Plus 2.0 Array	Affymetrix NetAffx website
1555963_x_at	B3GNT7	UDP-GlcNAc:betaGal beta-1,3-N-acetylglucosaminyltransferase 7	2q37.1	NM_145236	93010	299329	---	ENSG00000156966	Q8NFL0	CA503291	---	protein amino acid glycosylation	galactosyltransferase activity /// transferase activity /// transferase activity, transferring glycosyl groups	Golgi membrane /// Golgi apparatus /// membrane /// integral to membrane	Human Genome U133 Plus 2.0 Array	Affymetrix NetAffx website
1555967_at	---	---	---	---	---	21423	---	---	---	AA362254	---	---	---	---	Human Genome U133 Plus 2.0 Array	Affymetrix NetAffx website
1555971_s_at	FBXO28	F-box protein 28	1q42.11	NM_015176	23219	64691	609100	ENSG00000143756	Q9NVF7	AU154086	---	ubiquitin cycle	---	---	Human Genome U133 Plus 2.0 Array	Affymetrix NetAffx website
1555989_at	---	---	---	---	---	708500	---	---	---	AA890373	---	---	---	---	Human Genome U133 Plus 2.0 Array	Affymetrix NetAffx website
1556007_s_at	---	---	---	---	---	---	---	---	---	AI377389	---	---	---	---	Human Genome U133 Plus 2.0 Array	Affymetrix NetAffx website
1556034_s_at	MTMR11	myotubularin related protein 11	1q12-q21	NM_181873	10903	425144	---	ENSG00000014914	A4FU01 /// A8MPT7 /// Q3ZCP7 /// Q5SZ62 /// Q6P2Q8 /// Q99752 /// Q99753	AK097000	---	phospholipid dephosphorylation	inositol or phosphatidylinositol phosphatase activity	---	Human Genome U133 Plus 2.0 Array	Affymetrix NetAffx website
1556035_s_at	ZNF207	zinc finger protein 207	17q11.2	NM_001032293 /// NM_001098507 /// NM_003457	7756	706835	603428	ENSG00000010244	A8K6Y6 /// A8MTG3 /// O43670 /// Q53XS9 /// Q59G94 /// Q8N395	AI201248	---	regulation of transcription, DNA-dependent	nucleic acid binding /// DNA binding /// transcription factor activity /// zinc ion binding /// zinc ion binding /// metal ion binding	intracellular /// nucleus /// nucleus	Human Genome U133 Plus 2.0 Array	Affymetrix NetAffx website
1556060_a_at	KIAA1702	KIAA1702 protein	6p11	XM_001722675 /// XM_001724453 /// XM_001726133	80822	656721	---	---	Q9C0G1	AK027074	---	phosphoenolpyruvate-dependent sugar phosphotransferase system	sugar:hydrogen symporter activity	---	Human Genome U133 Plus 2.0 Array	Affymetrix NetAffx website
1556067_a_at	JMJD3	jumonji domain containing 3, histone lysine demethylase	17p13.1	NM_001080424	23135	223678	611577	ENSG00000132510	O15054	AI830331	---	---	binding	---	Human Genome U133 Plus 2.0 Array	Affymetrix NetAffx website
1556078_at	---	---	---	---	---	705563	---	---	---	BF509267	---	---	---	---	Human Genome U133 Plus 2.0 Array	Affymetrix NetAffx website
1556123_a_at	---	---	---	---	---	637720	---	---	---	CA431092	---	---	---	---	Human Genome U133 Plus 2.0 Array	Affymetrix NetAffx website
1556149_at	ARVCF	armadillo repeat gene deletes in velocardiofacial syndrome	22q11.21	NM_001670	421	---	602269	---	---	AW139431	---	cell adhesion /// multicellular organismal development	structural molecule activity /// binding /// protein binding	intracellular /// cytoplasm /// cytoskeleton	Human Genome U133 Plus 2.0 Array	Affymetrix NetAffx website
1556183_at	FLJ40330	hypothetical LOC645784	2p11.2	XR_015919	645784	105323	---	---	---	AK097649	---	---	---	---	Human Genome U133 Plus 2.0 Array	Affymetrix NetAffx website
1556242_a_at	---	---	---	---	---	665317	---	---	---	BC040715	---	---	---	---	Human Genome U133 Plus 2.0 Array	Affymetrix NetAffx website
1556285_s_at	PPA2	pyrophosphatase (inorganic) 2	4q25	NM_001034191 /// NM_006903 /// NM_176866 /// NM_176867 /// NM_176869	27068	654957	609988	ENSG00000138777	A6NKL9 /// A8K0P2 /// Q4W5E9 /// Q96HR1 /// Q9H2U2	AF086012	---	phosphate metabolic process	magnesium ion binding /// inorganic diphosphatase activity /// hydrolase activity /// metal ion binding	cytoplasm /// mitochondrion	Human Genome U133 Plus 2.0 Array	Affymetrix NetAffx website
1556291_at	DKFZp564N2472	hypothetical protein DKFZp564N2472	7p12.1	NM_182595	285877	381970	---	ENSG00000179770	Q8N7R1 /// Q8NDI9	AL833888	---	---	---	---	Human Genome U133 Plus 2.0 Array	Affymetrix NetAffx website
1556321_a_at	---	---	---	---	---	659491	---	---	---	BQ184262	---	---	---	---	Human Genome U133 Plus 2.0 Array	Affymetrix NetAffx website
1556422_at	---	---	---	---	---	658981	---	---	---	AK090676	---	---	---	---	Human Genome U133 Plus 2.0 Array	Affymetrix NetAffx website
1556499_s_at	COL1A1	collagen, type I, alpha 1	17q21.33	NM_000088	1277	172928	114000 /// 120150 /// 130000 /// 130060 /// 166200 /// 166210 /// 166220 /// 166710 /// 259420	ENSG00000108821	P02452 /// Q6LAN8 /// Q9UMA6	BE221212	<a target="external" href="http://www.wikipathways.org/index.php/Pathway:Homo_sapiens:Inflammatory_Response_Pathway">Inflammatory_Response_Pathway</a>	skeletal development /// ossification /// phosphate transport /// response to nutrient /// sensory perception of sound /// epidermis development /// response to mechanical stimulus /// response to inorganic substance /// response to corticosteroid stimulus /// response to hydrogen peroxide /// response to peptide hormone stimulus /// response to cAMP	structural molecule activity /// extracellular matrix structural constituent /// protein binding /// structural constituent of bone	extracellular region /// proteinaceous extracellular matrix /// collagen /// collagen type I /// cytoplasm	Human Genome U133 Plus 2.0 Array	Affymetrix NetAffx website
1556507_at	---	---	---	---	---	570546	---	---	---	BC038725	---	---	---	---	Human Genome U133 Plus 2.0 Array	Affymetrix NetAffx website
1556588_at	C15orf37	chromosome 15 open reading frame 37	15q25.1	NM_175898	283687	512015	---	ENSG00000180849	Q8NBB2 /// Q96AL6	AK091107	---	---	---	---	Human Genome U133 Plus 2.0 Array	Affymetrix NetAffx website
1556657_at	---	---	---	---	---	687293	---	---	---	AA744622	---	---	---	---	Human Genome U133 Plus 2.0 Array	Affymetrix NetAffx website
1556658_a_at	---	---	---	---	---	687293	---	---	---	AA744622	---	---	---	---	Human Genome U133 Plus 2.0 Array	Affymetrix NetAffx website
1556744_a_at	---	---	---	---	---	---	---	---	---	AI732587	---	---	---	---	Human Genome U133 Plus 2.0 Array	Affymetrix NetAffx website
1556797_at	LOC386597	hypothetical protein LOC386597	2p25.2	---	386597	559010	---	---	---	AK090737	---	---	---	---	Human Genome U133 Plus 2.0 Array	Affymetrix NetAffx website
1556821_x_at	DLEU2	deleted in lymphocytic leukemia, 2	13q14.3	NR_002612	8847	547964	605766	---	O43262 /// Q05CF6 /// Q7Z2U1	H48516	---	cell cycle /// negative regulation of cell cycle	---	---	Human Genome U133 Plus 2.0 Array	Affymetrix NetAffx website
1556834_at	---	---	---	---	---	562766	---	---	---	BC042986	---	---	---	---	Human Genome U133 Plus 2.0 Array	Affymetrix NetAffx website
1556900_at	LOC149773	hypothetical protein LOC149773	20q13.32	XR_042084 /// XR_042085 /// XR_042086	149773	473192	---	---	---	AK054637	---	---	---	---	Human Genome U133 Plus 2.0 Array	Affymetrix NetAffx website
1556950_s_at	SERPINB6	serpin peptidase inhibitor, clade B (ovalbumin), member 6	6p25	NM_004568	5269	519523	173321	---	P35237 /// Q59F97 /// Q7Z2Y7	AW275007	---	---	endopeptidase inhibitor activity /// serine-type endopeptidase inhibitor activity /// serine-type endopeptidase inhibitor activity /// protein binding	cytoplasm /// cytosol	Human Genome U133 Plus 2.0 Array	Affymetrix NetAffx website
1556959_at	hCG_2007354	hCG2007354	---	XR_041592 /// XR_041593	647589	703008	---	---	Q96MC1	AK057223	---	regulation of transcription, DNA-dependent /// regulation of transcription	DNA binding /// transcription factor activity /// sequence-specific DNA binding	nucleus	Human Genome U133 Plus 2.0 Array	Affymetrix NetAffx website
1557000_at	ESPNL	espin-like	2q37.3	NM_194312	339768	127724	---	ENSG00000144488	Q6UXY7 /// Q6ZVH7	BC042051	---	---	---	---	Human Genome U133 Plus 2.0 Array	Affymetrix NetAffx website
1557053_s_at	UBE2G2	ubiquitin-conjugating enzyme E2G 2 (UBC7 homolog, yeast)	21q22.3	NM_003343 /// NM_182688	7327	529420	603124	ENSG00000184787	A6NMQ7 /// A8K3L4 /// A8MW66 /// P60604 /// Q8NDD5	BC035653	---	ubiquitin-dependent protein catabolic process /// ubiquitin cycle /// post-translational protein modification /// regulation of protein metabolic process	ubiquitin-protein ligase activity /// protein binding /// ligase activity /// small conjugating protein ligase activity	cytoplasm	Human Genome U133 Plus 2.0 Array	Affymetrix NetAffx website
1557081_at	RBM25	RNA binding motif protein 25	14q24.3	NM_021239	58517	531106	---	---	A0PJL9 /// P49756 /// Q16083 /// Q2TA72 /// Q5XJ17 /// Q6P665 /// Q9H6A1	AA580691	---	nuclear mRNA splicing, via spliceosome /// mRNA processing	nucleotide binding /// nucleic acid binding /// mRNA binding	ribonucleoprotein complex	Human Genome U133 Plus 2.0 Array	Affymetrix NetAffx website
1557100_s_at	HECTD1	HECT domain containing 1	14q12	NM_015382	25831	708017	---	ENSG00000092148	Q2KQ74 /// Q5XJ19 /// Q9BRJ0 /// Q9ULT8	AL038005	---	protein modification process /// ubiquitin cycle	ubiquitin-protein ligase activity /// binding /// ligase activity	intracellular	Human Genome U133 Plus 2.0 Array	Affymetrix NetAffx website
1557185_at	TPCN1	two pore segment channel 1	12q24.13	NM_017901	53373	524763	609666	---	A5PKY2 /// A7E258 /// Q9NWT7 /// Q9ULQ1	BU630557	---	transport /// ion transport /// calcium ion transport	ion channel activity /// voltage-gated ion channel activity /// calcium channel activity /// calcium ion binding /// sugar binding	membrane /// integral to membrane	Human Genome U133 Plus 2.0 Array	Affymetrix NetAffx website
1557197_a_at	LGALS3	lectin, galactoside-binding, soluble, 3	14q21-q22	NM_002306 /// NR_003225	3958	531081	153619	---	P17931 /// Q59FR8 /// Q6FGL0 /// Q6IBA7 /// Q6MZI9 /// Q6NVH9 /// Q86TY5	AW085690	---	---	sugar binding /// sugar binding /// IgE binding	extracellular region /// nucleus /// nucleus /// cytoplasm /// plasma membrane	Human Genome U133 Plus 2.0 Array	Affymetrix NetAffx website
1557228_at	EHBP1L1	EH domain binding protein 1-like 1	11q13.1	NM_001099409	254102	502867	---	ENSG00000173442	Q8N3D4 /// Q9NQ27	AJ404607	---	---	---	---	Human Genome U133 Plus 2.0 Array	Affymetrix NetAffx website
1557258_a_at	BCL10	B-cell CLL/lymphoma 10	1p22	NM_003921	8915	193516	603517	---	A2TDT2 /// O95999 /// Q5VUF1	AA994334	---	neural tube closure /// neural tube closure /// toll-like receptor signaling pathway /// response to molecule of bacterial origin /// adaptive immune response /// negative regulation of mature B cell apoptosis /// apoptosis /// apoptosis /// cellular defense response /// cell cycle /// I-kappaB kinase/NF-kappaB cascade /// cell death /// response to fungus /// immunoglobulin mediated immune respo…	transcription coactivator activity /// protein binding /// protein binding /// protein C-terminus binding /// transcription factor binding /// kinase activator activity /// kinase binding /// protein kinase binding /// ubiquitin protein ligase binding /// ubiquitin binding /// protein kinase B binding /// protein self-association /// NF-kappaB binding	intracellular /// nucleus /// cytoplasm /// cytoplasm /// lysosome /// cytosol /// cytosol /// CBM complex /// T cell receptor complex /// protein complex /// membrane raft /// lipopolysaccharide receptor complex /// perinuclear region of cytoplasm	Human Genome U133 Plus 2.0 Array	Affymetrix NetAffx website
1557270_at	---	---	---	---	---	658583	---	---	---	AA632049	---	---	---	---	Human Genome U133 Plus 2.0 Array	Affymetrix NetAffx website
1557293_at	LOC440993	hypothetical gene supported by AK128346	3q29	XR_039810	440993	709411	---	ENSG00000205814	Q6ZRC0	CA418406	---	---	---	---	Human Genome U133 Plus 2.0 Array	Affymetrix NetAffx website
1557389_at	---	---	---	---	---	655149	---	---	---	AK056784	---	---	---	---	Human Genome U133 Plus 2.0 Array	Affymetrix NetAffx website
1557411_s_at	SLC25A43	solute carrier family 25, member 43	Xq24	NM_145305	203427	496658	300641	ENSG00000077713	A6NIJ3 /// A8K7M0 /// Q8WUT9 /// Q9BR35	AK094254	---	translation /// transport	structural constituent of ribosome /// transporter activity /// binding	intracellular /// mitochondrion /// mitochondrial inner membrane /// ribosome /// membrane /// integral to membrane	Human Genome U133 Plus 2.0 Array	Affymetrix NetAffx website
1557418_at	---	---	---	---	---	710065	---	---	---	W95007	---	---	---	---	Human Genome U133 Plus 2.0 Array	Affymetrix NetAffx website
1557458_s_at	SHB	Src homology 2 domain containing adaptor protein B	9p13.2-p13.1	NM_003028	6461	521482	600314	ENSG00000107338	Q15464	BU685917	---	angiogenesis /// apoptosis /// signal transduction /// multicellular organismal development /// cell differentiation	SH3/SH2 adaptor activity /// protein binding	cytoplasm /// membrane	Human Genome U133 Plus 2.0 Array	Affymetrix NetAffx website
1557527_at	---	---	---	---	---	675708	---	---	---	BU789637	---	---	---	---	Human Genome U133 Plus 2.0 Array	Affymetrix NetAffx website
1557632_at	---	---	---	---	---	703691	---	---	---	BU681135	---	---	---	---	Human Genome U133 Plus 2.0 Array	Affymetrix NetAffx website
1557675_at	RAF1	V-raf-1 murine leukemia viral oncogene homolog 1	3p25	NM_002880	5894	159130	164760 /// 611553 /// 611554	---	P04049	BI496583	<a target="external" href="http://www.wikipathways.org/index.php/Pathway:Homo_sapiens:MAPK_Cascade">MAPK_Cascade</a>	protein amino acid phosphorylation /// protein amino acid phosphorylation /// apoptosis /// apoptosis /// cytoskeleton organization and biogenesis /// signal transduction /// signal transduction /// intracellular signaling cascade /// cell proliferation /// nerve growth factor receptor signaling pathway	nucleotide binding /// protein kinase activity /// protein kinase activity /// protein serine/threonine kinase activity /// receptor signaling protein activity /// protein binding /// protein binding /// ATP binding /// zinc ion binding /// kinase activity /// transferase activity /// diacylglycerol binding /// metal ion binding	mitochondrial outer membrane	Human Genome U133 Plus 2.0 Array	Affymetrix NetAffx website
1557688_at	---	---	---	---	---	684014	---	---	---	AL833022	---	---	---	---	Human Genome U133 Plus 2.0 Array	Affymetrix NetAffx website
1557813_at	---	---	---	---	---	655495	---	---	---	BF724621	---	---	---	---	Human Genome U133 Plus 2.0 Array	Affymetrix NetAffx website
1557820_at	AFG3L2	AFG3 ATPase family gene 3-like 2 (yeast)	18p11	NM_006796	10939	528996	604581	ENSG00000141385	Q8TA92 /// Q9Y4W6	AA905788	---	proteolysis /// protein catabolic process	nucleotide binding /// metalloendopeptidase activity /// ATP binding /// peptidase activity /// metallopeptidase activity /// zinc ion binding /// hydrolase activity /// nucleoside-triphosphatase activity /// metal ion binding /// unfolded protein binding	mitochondrion /// mitochondrion /// mitochondrial inner membrane /// membrane /// integral to membrane /// mitochondrial membrane	Human Genome U133 Plus 2.0 Array	Affymetrix NetAffx website
1557905_s_at	CD44	CD44 molecule (Indian blood group)	11p13	NM_000610 /// NM_001001389 /// NM_001001390 /// NM_001001391 /// NM_001001392	960	502328	107269	ENSG00000026508	A5YRN9 /// A6NDN4 /// A8K309 /// O95370 /// O95658 /// O95659 /// P16070 /// Q86UZ1 /// Q99900 /// Q9H5A3 /// Q9H5A4 /// Q9H5A5 /// Q9H5A6 /// Q9H5A7 /// Q9P2Z2 /// Q9UC30 /// Q9UCB0	AL552534	---	cell adhesion /// cell-matrix adhesion /// cell-cell adhesion	receptor activity /// binding /// protein binding /// protein binding /// collagen binding /// hyaluronic acid binding /// hyaluronic acid binding	integral to plasma membrane /// membrane /// integral to membrane	Human Genome U133 Plus 2.0 Array	Affymetrix NetAffx website
1557910_at	HSP90AB1	heat shock protein 90kDa alpha (cytosolic), class B member 1	6p12	NM_007355	3326	509736	140572	ENSG00000096384	A8K3W9 /// O14942 /// P08238 /// Q5T9W4 /// Q5T9W5 /// Q5T9W6 /// Q6PK50 /// Q9H6X9	BG612458	---	protein folding /// response to stress /// response to unfolded protein /// positive regulation of nitric oxide biosynthetic process	nucleotide binding /// protein binding /// protein binding /// ATP binding /// nitric-oxide synthase regulator activity /// TPR domain binding /// unfolded protein binding	cytoplasm /// cytoplasm /// melanosome	Human Genome U133 Plus 2.0 Array	Affymetrix NetAffx website
1557918_s_at	SLC16A1	solute carrier family 16, member 1 (monocarboxylic acid transporter 1)	1p12	NM_003051	6566	75231	245340 /// 600682	ENSG00000155380	P53985 /// Q49A45 /// Q5T8R3 /// Q5T8R4 /// Q5T8R5 /// Q5T8R6	AU131482	---	transport /// organic anion transport /// monocarboxylic acid transport /// mevalonate transport	transporter activity /// protein binding /// monocarboxylic acid transmembrane transporter activity /// mevalonate transmembrane transporter activity /// symporter activity /// secondary active monocarboxylate transmembrane transporter activity	membrane fraction /// plasma membrane /// membrane /// integral to membrane /// integral to membrane	Human Genome U133 Plus 2.0 Array	Affymetrix NetAffx website
1557938_s_at	PTRF	polymerase I and transcript release factor	17q21.31	NM_012232	284119	437191	603198	ENSG00000177469	Q6NZI2	AL545542	---	transcription /// transcription termination /// regulation of transcription, DNA-dependent /// transcription initiation from RNA polymerase I promoter	RNA polymerase I transcription termination factor activity /// RNA polymerase I transcription termination factor activity /// RNA binding /// protein binding /// rRNA binding /// rRNA primary transcript binding /// rRNA primary transcript binding	nucleus /// nucleus /// cytoplasm /// cytoplasm /// mitochondrion /// mitochondrion /// endoplasmic reticulum /// microsome /// plasma membrane /// caveola /// membrane	Human Genome U133 Plus 2.0 Array	Affymetrix NetAffx website
1557944_s_at	CTNND1	catenin (cadherin-associated protein), delta 1	11q11	NM_001085458 /// NM_001085459 /// NM_001085460 /// NM_001085461 /// NM_001085462 /// NM_001085463 /// NM_001085464 /// NM_001085465 /// NM_001085466 /// NM_001085467 /// NM_001085468 /// NM_001085469 /// NM_001331	1500	166011	601045	ENSG00000198561	O60716 /// Q68DU0 /// Q7KZJ3 /// Q96FS1 /// Q9Y320	BG248249	---	transcription /// regulation of transcription, DNA-dependent /// cell adhesion /// cell adhesion /// Wnt receptor signaling pathway /// cell-cell adhesion /// cell redox homeostasis	structural molecule activity /// binding /// protein binding	nucleus /// nucleus /// cytoplasm /// cytoplasm /// cytoskeleton /// plasma membrane /// membrane /// integral to membrane	Human Genome U133 Plus 2.0 Array	Affymetrix NetAffx website
1557965_at	MTERFD2	MTERF domain containing 2	2q37.3	NM_182501	130916	159556	---	ENSG00000122085	A8K6K0 /// Q7Z6M4	AL566167	---	---	---	---	Human Genome U133 Plus 2.0 Array	Affymetrix NetAffx website
1557987_at	LOC653786	otoancorin pseudogene	16p12.1	NR_003676 /// XR_017362	653786	564945	---	---	---	BC042832	---	---	---	---	Human Genome U133 Plus 2.0 Array	Affymetrix NetAffx website
1557996_at	POLR2J4	polymerase (RNA) II (DNA directed) polypeptide J, 13.3kDa pseudogene	7p13	NR_003655 /// XR_042143 /// XR_042182	84820	657028	---	---	Q0VGM6 /// Q6P5R8 /// Q6PJD2 /// Q8IZ67	AK091784	---	transcription	DNA binding /// DNA-directed RNA polymerase activity /// protein dimerization activity	---	Human Genome U133 Plus 2.0 Array	Affymetrix NetAffx website
1558014_s_at	MLSTD2	male sterility domain containing 2	11p15.2	NM_032228	84188	501991	---	ENSG00000197601	Q8WVX9 /// Q9H600	BG261090	---	lipid metabolic process /// metabolic process /// lipid biosynthetic process	catalytic activity /// binding /// protein binding /// oxidoreductase activity	peroxisome /// peroxisomal membrane /// membrane /// integral to membrane	Human Genome U133 Plus 2.0 Array	Affymetrix NetAffx website
1558015_s_at	ACTR2	ARP2 actin-related protein 2 homolog (yeast)	2p14	NM_001005386 /// NM_005722	10097	699451	604221	ENSG00000138071	P61160 /// Q8IY98	BU175810	---	cell motility	nucleotide binding /// actin binding /// protein binding /// protein binding /// ATP binding	cytoplasm /// cytoskeleton /// Arp2/3 protein complex /// actin cytoskeleton /// cell projection	Human Genome U133 Plus 2.0 Array	Affymetrix NetAffx website
1558028_x_at	---	---	---	---	---	707317	---	---	---	BI857154	---	---	---	---	Human Genome U133 Plus 2.0 Array	Affymetrix NetAffx website
1558048_x_at	---	---	---	---	---	---	---	---	---	BG389789	---	---	---	---	Human Genome U133 Plus 2.0 Array	Affymetrix NetAffx website
1558080_s_at	LOC144871	hypothetical protein LOC144871	13q32.1	---	144871	59214	---	---	---	BG913589	---	---	---	---	Human Genome U133 Plus 2.0 Array	Affymetrix NetAffx website
1558093_s_at	MATR3	matrin 3	5q31.2	NM_018834 /// NM_199189	9782	268939	164015	ENSG00000015479	A8MXP9 /// P43243 /// Q5CZA7 /// Q68D11 /// Q68E03 /// Q9H4N1	BI832461	---	---	nucleotide binding /// nucleic acid binding /// RNA binding /// structural molecule activity /// protein binding /// zinc ion binding /// metal ion binding	intracellular /// nucleus /// nuclear inner membrane /// nuclear matrix	Human Genome U133 Plus 2.0 Array	Affymetrix NetAffx website
1558097_at	C22orf30	chromosome 22 open reading frame 30	22q12.2-q12.3	NM_173566	253143	438906	---	ENSG00000183530	Q5THK1	W21283	---	---	---	---	Human Genome U133 Plus 2.0 Array	Affymetrix NetAffx website
1558111_at	MBNL1	muscleblind-like (Drosophila)	3q25	NM_021038 /// NM_207292 /// NM_207293 /// NM_207294 /// NM_207295 /// NM_207296 /// NM_207297	4154	478000	606516	---	Q68DD0 /// Q86UV8 /// Q86UV9 /// Q86VM6 /// Q96P92 /// Q96RE3 /// Q9BS62 /// Q9NR56	AL562860	---	in utero embryonic development /// nervous system development /// muscle development /// embryonic limb morphogenesis /// myoblast differentiation	nucleic acid binding /// RNA binding /// double-stranded RNA binding /// zinc ion binding /// metal ion binding	nucleus /// nucleus /// cytoplasm	Human Genome U133 Plus 2.0 Array	Affymetrix NetAffx website
1558136_s_at	TAF11	TAF11 RNA polymerase II, TATA box binding protein (TBP)-associated factor, 28kDa	6p21.31	NM_005643	6882	112444	600772	ENSG00000064995	Q15544	BQ709323	---	transcription /// regulation of transcription, DNA-dependent /// regulation of transcription	DNA binding /// RNA polymerase II transcription factor activity /// protein binding /// protein binding /// general RNA polymerase II transcription factor activity	nucleus /// transcription factor TFIID complex /// transcription factor TFIID complex	Human Genome U133 Plus 2.0 Array	Affymetrix NetAffx website
1558142_at	TNRC6B	trinucleotide repeat containing 6B	22q13.1	NM_001024843 /// NM_015088	23112	372082	610740	ENSG00000100354	A8MYY3 /// Q9UPQ9	AL831862	---	---	nucleotide binding	---	Human Genome U133 Plus 2.0 Array	Affymetrix NetAffx website
1558143_a_at	BCL2L11	BCL2-like 11 (apoptosis facilitator)	2q13	NM_006538 /// NM_138621 /// NM_207002	10018	469658	603827	ENSG00000153094	A8K2W2 /// O43521 /// Q0MSE7 /// Q0MSE8 /// Q0MSE9 /// Q53R28 /// Q6JTU4 /// Q6JTU6 /// Q6T851 /// Q6TE14 /// Q6TE15 /// Q6TE16 /// Q6V402 /// Q8WYL6 /// Q8WYL7 /// Q8WYL8 /// Q8WYL9 /// Q8WYM0 /// Q8WYM1	AK027160	<a target="external" href="http://www.wikipathways.org/index.php/Pathway:Homo_sapiens:Apoptosis">Apoptosis</a>	apoptosis /// induction of apoptosis /// positive regulation of apoptosis	protein binding	membrane fraction /// membrane	Human Genome U133 Plus 2.0 Array	Affymetrix NetAffx website
1558154_at	---	---	---	---	---	670451	---	---	Q8WZ41	AF289551	---	---	---	---	Human Genome U133 Plus 2.0 Array	Affymetrix NetAffx website
1558173_a_at	LUZP1	leucine zipper protein 1	1p36	NM_033631	7798	257900	601422	ENSG00000169641	Q05DE3 /// Q5TH92 /// Q86V48	AK093016	---	---	---	nucleus	Human Genome U133 Plus 2.0 Array	Affymetrix NetAffx website
1558176_at	IGL@ /// IGLC2 /// IGLV7-46 /// IGLV7-43 /// IGLV2-14	immunoglobulin lambda locus /// immunoglobulin lambda constant 2 (Kern-Oz- marker) /// immunoglobulin lambda variable 7-46 /// immunoglobulin lambda variable 7-43 /// immunoglobulin lambda variable 2-14	22q11.1-q11.2 /// 22q11.2	---	28775 /// 28776 /// 28815 /// 3535 /// 3538	449585	---	ENSG00000211649 /// ENSG00000211652 /// ENSG00000211675 /// ENSG00000211677 /// ENSG00000211679 /// ENSG00000211683 /// ENSG00000211685	A0A5C9 /// A0A5E4 /// A0M8Q4 /// A0M8Q6 /// A0M8Q9 /// A0N5G3 /// A0N8J8 /// A2JA15 /// A2N2G6 /// A2NUT2 /// A6NKU1 /// P01842 /// P04211 /// Q567P1 /// Q5CZ94 /// Q5FWF9 /// Q5NV80 /// Q5NV83 /// Q6DHW4 /// Q6GMV7 /// Q6GMV8 /// Q6GMW3 /// Q6GMW4 /// Q6GMW6 /// Q6GMX3 /// Q6GMX4 /// Q6IN99 /// Q6IPQ0 /// Q6NS95 /// Q6NS96 /// Q6P2J1 /// Q6P5S3 /// Q6PIK1 /// Q6PIQ7 /// Q6PJA3 /// Q6PJG0 /// Q6P…	AJ388663	---	tRNA aminoacylation for protein translation /// immune response	nucleotide binding /// antigen binding /// antigen binding /// aminoacyl-tRNA ligase activity /// ATP binding	extracellular region /// cytoplasm	Human Genome U133 Plus 2.0 Array	Affymetrix NetAffx website
1558214_s_at	CTNNA1	catenin (cadherin-associated protein), alpha 1, 102kDa	5q31	NM_001903	1495	534797	116805	ENSG00000044115	P35221 /// Q8N1C0	BG330076	---	cell adhesion /// cell adhesion /// establishment and/or maintenance of cell polarity /// negative regulation of neuroblast proliferation /// negative regulation of apoptosis /// apical junction assembly /// apical junction assembly /// positive regulation of smoothened signaling pathway	structural molecule activity /// protein binding /// protein binding /// vinculin binding /// cadherin binding /// actin filament binding	cytoplasm /// cytoskeleton /// adherens junction /// zonula adherens /// actin cytoskeleton /// lamellipodium /// cell junction	Human Genome U133 Plus 2.0 Array	Affymetrix NetAffx website
1558233_s_at	ATF1	activating transcription factor 1	12q13	NM_005171	466	648565	123803	---	P18846	CA337502	<a target="external" href="http://www.wikipathways.org/index.php/Pathway:Homo_sapiens:Smooth_muscle_contraction">Smooth_muscle_contraction</a>	transcription /// regulation of transcription, DNA-dependent	DNA binding /// transcription factor activity /// transcription factor activity /// protein binding /// protein binding /// sequence-specific DNA binding /// protein dimerization activity	nucleus /// transcription factor complex	Human Genome U133 Plus 2.0 Array	Affymetrix NetAffx website
1558236_at	---	---	---	---	---	---	---	---	---	BC014318	---	---	---	---	Human Genome U133 Plus 2.0 Array	Affymetrix NetAffx website
1558237_x_at	---	---	---	---	---	---	---	---	---	BC014318	---	---	---	---	Human Genome U133 Plus 2.0 Array	Affymetrix NetAffx website
1558281_a_at	TMEM184A	transmembrane protein 184A	7p22.3	NM_001097620	202915	592174	---	ENSG00000164855	Q6ZMB5 /// Q6ZTR0 /// Q8N2J0	BQ277407	---	---	---	membrane /// integral to membrane	Human Genome U133 Plus 2.0 Array	Affymetrix NetAffx website
1558290_a_at	PVT1	Pvt1 oncogene homolog (mouse)	8q24	NR_003367	5820	133107	165140	---	---	BG200951	---	---	---	---	Human Genome U133 Plus 2.0 Array	Affymetrix NetAffx website
1558292_s_at	PIGW	phosphatidylinositol glycan anchor biosynthesis, class W	17q12	NM_178517	284098	378885	610275	ENSG00000184886	Q7Z7B1	BF037819	---	GPI anchor biosynthetic process	acyltransferase activity /// transferase activity /// transferase activity, transferring acyl groups	endoplasmic reticulum /// endoplasmic reticulum membrane /// membrane /// integral to membrane	Human Genome U133 Plus 2.0 Array	Affymetrix NetAffx website
1558397_at	---	---	---	---	---	376675	---	---	---	BF976693	---	---	---	---	Human Genome U133 Plus 2.0 Array	Affymetrix NetAffx website
1558412_at	LOC113230	hypothetical protein LOC113230	19p13.12	XM_001719438 /// XM_053966 /// XM_937316	113230	372775	---	ENSG00000141854	Q96FF7	BC011002	---	---	---	---	Human Genome U133 Plus 2.0 Array	Affymetrix NetAffx website
1558423_at	LOC349114	hypothetical LOC349114	7p14.1	XR_040227 /// XR_040228 /// XR_040229 /// XR_040230	349114	705613	---	---	Q8N836	BE715671	---	---	---	---	Human Genome U133 Plus 2.0 Array	Affymetrix NetAffx website
1558426_x_at	ORAI2	ORAI calcium release-activated calcium modulator 2	7q22.1	NM_001126340 /// NM_032831	80228	680539	610929	---	---	BC016797	---	---	---	membrane /// integral to membrane	Human Genome U133 Plus 2.0 Array	Affymetrix NetAffx website
1558511_s_at	FAM62B	family with sequence similarity 62 (C2 domain containing) member B	7q36.3	NM_020728	57488	490795	---	ENSG00000117868	A0FGR8 /// A4D229 /// A6NFV7	AA187963	---	---	---	plasma membrane /// membrane /// integral to membrane	Human Genome U133 Plus 2.0 Array	Affymetrix NetAffx website
1558515_at	---	---	---	---	---	349570	---	---	---	AK057701	---	---	---	---	Human Genome U133 Plus 2.0 Array	Affymetrix NetAffx website
1558549_s_at	VNN1	vanin 1	6q23-q24	NM_004666	8876	12114	603570	ENSG00000112299	A8K310 /// O95497	BG120535	---	nitrogen compound metabolic process /// cell motility	hydrolase activity /// hydrolase activity, acting on carbon-nitrogen (but not peptide) bonds /// hydrolase activity, acting on carbon-nitrogen (but not peptide) bonds, in linear amides /// pantetheine hydrolase activity	plasma membrane /// membrane /// anchored to membrane	Human Genome U133 Plus 2.0 Array	Affymetrix NetAffx website
1558647_at	SH3D19 /// FLJ46481	SH3 domain containing 19 /// FLJ46481 protein	4p16.1 /// 4q31.3	NM_001009555 /// NM_207405	152503 /// 389197	567725	608674	ENSG00000109686	Q5HYK7 /// Q6PJX8 /// Q6ZRC1	AA100736	---	---	---	nucleus /// cytoplasm	Human Genome U133 Plus 2.0 Array	Affymetrix NetAffx website
1558662_s_at	BANK1	B-cell scaffold protein with ankyrin repeats 1	4q24	NM_001083907 /// NM_017935	55024	480400	152700 /// 610292	ENSG00000153064	A8K7W8 /// B0F3S2 /// Q8NDB2	BG200452	---	B cell activation	---	---	Human Genome U133 Plus 2.0 Array	Affymetrix NetAffx website
1558678_s_at	MALAT1	metastasis associated lung adenocarcinoma transcript 1 (non-protein coding)	11q13.1	NR_002819	378938	642877	607924	---	Q9H355 /// Q9UHZ2	BE708432	---	---	---	---	Human Genome U133 Plus 2.0 Array	Affymetrix NetAffx website
1558688_at	LOC441461	hypothetical gene supported by BC030123	9q31.1	XR_041357 /// XR_041358 /// XR_041359	441461	163155	---	---	---	BG701300	---	---	---	---	Human Genome U133 Plus 2.0 Array	Affymetrix NetAffx website
1558695_at	---	---	---	---	---	658635	---	---	---	AF085937	---	---	---	---	Human Genome U133 Plus 2.0 Array	Affymetrix NetAffx website
1558699_a_at	HERPUD2	HERPUD family member 2	7p14.2	NM_022373	64224	599851	---	ENSG00000122557	A4D1Y8 /// Q9BSE4	BG249246	---	protein modification process /// response to unfolded protein	---	membrane /// integral to membrane	Human Genome U133 Plus 2.0 Array	Affymetrix NetAffx website
1558733_at	ZBTB38	zinc finger and BTB domain containing 38	3q23	NM_001080412	253461	518301	---	ENSG00000177311	Q32Q70 /// Q8NAP3 /// Q96NB8 /// Q9H6F0	BE386445	---	transcription /// regulation of transcription, DNA-dependent /// positive regulation of transcription from RNA polymerase II promoter	nucleic acid binding /// DNA binding /// transcription factor activity /// protein binding /// zinc ion binding /// metal ion binding	intracellular /// nucleus /// nucleus	Human Genome U133 Plus 2.0 Array	Affymetrix NetAffx website
1558738_at	NOL3	Nucleolar protein 3 (apoptosis repressor with CARD domain)	16q21-q23	NM_003946	8996	513667	605235	---	O60936 /// Q5TZN6	BU785956	---	mRNA processing /// apoptosis /// anti-apoptosis /// RNA splicing /// RNA splicing /// regulation of apoptosis	RNA binding /// protein binding /// protein binding /// identical protein binding	intracellular /// nucleus /// nucleolus /// cytoplasm /// cytosol	Human Genome U133 Plus 2.0 Array	Affymetrix NetAffx website
1558747_at	SMCHD1	structural maintenance of chromosomes flexible hinge domain containing 1	18p11.32	NM_015295	23347	8118	---	---	A6NHR9	AA336502	---	chromosome organization and biogenesis	protein binding /// ATP binding	chromosome	Human Genome U133 Plus 2.0 Array	Affymetrix NetAffx website
1558761_a_at	FAM120AOS	family with sequence similarity 120A opposite strand	9q22.31	NM_198841	158293	709859	---	---	---	AK093641	---	---	---	---	Human Genome U133 Plus 2.0 Array	Affymetrix NetAffx website
1558784_at	---	---	---	---	---	---	---	---	---	BG540230	---	---	---	---	Human Genome U133 Plus 2.0 Array	Affymetrix NetAffx website
1558924_s_at	CLIP1	CAP-GLY domain containing linker protein 1	12q24.3	NM_002956 /// NM_198240	6249	524809	179838	ENSG00000130779	A0AVD3 /// O43666 /// O43667 /// P30622 /// Q17RS4 /// Q29RG0 /// Q59GJ4 /// Q6P5Z9 /// Q6PIA3 /// Q6Q318 /// Q86WU4	BF673049	---	mitosis	nucleic acid binding /// protein binding /// microtubule binding /// zinc ion binding /// protein homodimerization activity /// metal ion binding	kinetochore /// cytoplasm /// endosome /// cytoskeleton /// microtubule /// intermediate filament /// microtubule cytoskeleton	Human Genome U133 Plus 2.0 Array	Affymetrix NetAffx website
1558943_x_at	ZNF765	zinc finger protein 765	19q13.41	NM_001040185	91661	710250	---	ENSG00000196417	A8MV20 /// A8MYG0 /// Q9BV49	BU686397	---	regulation of transcription, DNA-dependent	nucleic acid binding /// zinc ion binding /// metal ion binding	intracellular	Human Genome U133 Plus 2.0 Array	Affymetrix NetAffx website
1558953_s_at	CEP164	centrosomal protein 164kDa	11q23.3	NM_014956	22897	504009	---	ENSG00000110274	Q6ZU43 /// Q9NTH6 /// Q9UPV0	BC000602	---	---	protein binding	---	Human Genome U133 Plus 2.0 Array	Affymetrix NetAffx website
1558956_s_at	IFT80	intraflagellar transport 80 homolog (Chlamydomonas)	3q26.1	NM_020800	57560	478095	611177 /// 611263	ENSG00000068885	Q9P2H3	AI473255	---	---	---	cytoplasm	Human Genome U133 Plus 2.0 Array	Affymetrix NetAffx website
1559038_at	SEPT2	septin 2	2q37	NM_001008491 /// NM_001008492 /// NM_004404 /// NM_006155	4735	335057	601506	---	Q15019	BC043180	---	cell cycle /// cell division	nucleotide binding /// protein binding /// protein binding /// GTP binding	nucleus /// cytoplasm /// septin complex	Human Genome U133 Plus 2.0 Array	Affymetrix NetAffx website
1559156_at	---	---	---	---	---	658076	---	---	---	BC036508	---	---	---	---	Human Genome U133 Plus 2.0 Array	Affymetrix NetAffx website
1559190_s_at	RDH13	Retinol dehydrogenase 13 (all-trans/9-cis)	19q13.42	NM_138412	112724	327631 /// 632973	---	---	A8K6B4 /// Q8NBN7	AL833150	---	metabolic process	catalytic activity /// binding /// oxidoreductase activity	---	Human Genome U133 Plus 2.0 Array	Affymetrix NetAffx website
1559224_at	LCE1E	late cornified envelope 1E	1q21.3	NM_178353	353135	250236	---	ENSG00000172155 /// ENSG00000186226	Q5T752 /// Q5T753	BC038391	---	keratinization	---	---	Human Genome U133 Plus 2.0 Array	Affymetrix NetAffx website
1559226_x_at	LCE1E	late cornified envelope 1E	1q21.3	NM_178353	353135	250236	---	ENSG00000186226	Q5T753	BC038391	---	keratinization	---	---	Human Genome U133 Plus 2.0 Array	Affymetrix NetAffx website
1559263_s_at	PPIL4 /// ZC3H12D	peptidylprolyl isomerase (cyclophilin)-like 4 /// zinc finger CCCH-type containing 12D	6q24-q25 /// 6q25.1	NM_139126 /// NM_207360	340152 /// 85313	632618	607609 /// 611106	---	A1L178 /// Q32Q83 /// Q6P392 /// Q6ZRW2 /// Q8NF40 /// Q8WUA2 /// Q96AL2 /// Q9H287 /// Q9P1R3	BG397809	---	protein folding	nucleotide binding /// nucleic acid binding /// RNA binding /// peptidyl-prolyl cis-trans isomerase activity /// isomerase activity	nucleus	Human Genome U133 Plus 2.0 Array	Affymetrix NetAffx website
1559391_s_at	---	---	---	---	---	667269	---	---	---	AI084451	---	---	---	---	Human Genome U133 Plus 2.0 Array	Affymetrix NetAffx website
1559400_s_at	PAPPA	pregnancy-associated plasma protein A, pappalysin 1	9q33.2	NM_002581	5069	712558	176385	ENSG00000182752	Q13219 /// Q5QFB7 /// Q5QFB8 /// Q5QFB9 /// Q7Z613 /// Q8IWT8	BG620958	---	proteolysis /// female pregnancy /// female pregnancy /// cell differentiation	endopeptidase activity /// peptidase activity /// metallopeptidase activity /// metallopeptidase activity /// metallopeptidase activity /// zinc ion binding /// zinc ion binding /// zinc ion binding /// hydrolase activity /// metal ion binding	extracellular region /// extracellular region /// extracellular region /// extracellular space /// endoplasmic reticulum /// endoplasmic reticulum membrane /// membrane /// integral to membrane	Human Genome U133 Plus 2.0 Array	Affymetrix NetAffx website
1559410_at	---	---	---	---	---	490920	---	---	---	AA524609	---	---	---	---	Human Genome U133 Plus 2.0 Array	Affymetrix NetAffx website
1559425_at	---	---	---	---	---	662187	---	---	---	AL512701	---	---	---	---	Human Genome U133 Plus 2.0 Array	Affymetrix NetAffx website
1559436_x_at	---	---	---	---	---	684047	---	---	---	AL832061	---	---	---	---	Human Genome U133 Plus 2.0 Array	Affymetrix NetAffx website
1559496_at	PPA2	Pyrophosphatase (inorganic) 2	4q25	NM_001034191 /// NM_006903 /// NM_176866 /// NM_176867 /// NM_176869	27068	654957	609988	---	A8K0P2 /// Q9H2U2	AL833123	---	phosphate metabolic process	magnesium ion binding /// inorganic diphosphatase activity /// hydrolase activity /// metal ion binding	cytoplasm /// mitochondrion	Human Genome U133 Plus 2.0 Array	Affymetrix NetAffx website
1559538_at	---	---	---	---	---	663336	---	---	---	BC043558	---	---	---	---	Human Genome U133 Plus 2.0 Array	Affymetrix NetAffx website
1559584_a_at	C16orf54 /// hCG_1644884	chromosome 16 open reading frame 54 /// similar to chromosome 16 open reading frame 54	16p11.2	NM_175900 /// XM_001128758	283897 /// 728070	331095	---	ENSG00000185905 /// ENSG00000215673	Q6UWD8	BC025741	---	---	---	membrane /// integral to membrane	Human Genome U133 Plus 2.0 Array	Affymetrix NetAffx website
1559591_s_at	CHDH	choline dehydrogenase	3p21.1	NM_018397	55349	126688	---	---	Q8NE62	AA609488	---	alcohol metabolic process	choline dehydrogenase activity /// oxidoreductase activity /// oxidoreductase activity, acting on CH-OH group of donors /// FAD binding	mitochondrion /// mitochondrial inner membrane	Human Genome U133 Plus 2.0 Array	Affymetrix NetAffx website
1559667_at	---	---	---	---	---	611493	---	---	---	BU928170	---	---	---	---	Human Genome U133 Plus 2.0 Array	Affymetrix NetAffx website
1559776_at	---	---	---	---	---	595177	---	---	---	H41167	---	---	---	---	Human Genome U133 Plus 2.0 Array	Affymetrix NetAffx website
1559822_s_at	---	---	---	---	---	601293	---	---	Q96GH5	BC009463	---	---	---	---	Human Genome U133 Plus 2.0 Array	Affymetrix NetAffx website
1559910_at	---	---	---	---	---	655648	---	---	---	AL080280	---	---	---	---	Human Genome U133 Plus 2.0 Array	Affymetrix NetAffx website
1560049_at	---	---	---	---	---	667177	---	---	---	AI125337	---	---	---	---	Human Genome U133 Plus 2.0 Array	Affymetrix NetAffx website
1560128_x_at	LOC441108	Hypothetical gene supported by AK128882	5q31.1	NM_001013717	441108	658288 /// 708847	---	---	Q8N8D9	AL713721	---	---	---	---	Human Genome U133 Plus 2.0 Array	Affymetrix NetAffx website
1560199_x_at	FLJ11903	similar to hypothetical protein MGC40405	5q12.1	XM_926814 /// XM_931587 /// XM_931593	653158	664739	---	---	---	AU120130	---	---	---	---	Human Genome U133 Plus 2.0 Array	Affymetrix NetAffx website
1560278_at	LOC221122	hypothetical protein LOC221122	11p11.2	---	221122	551656	---	---	---	BC039666	---	---	---	---	Human Genome U133 Plus 2.0 Array	Affymetrix NetAffx website
1560320_a_at	UNQ2963	hypothetical protein LOC283314	12p13.31	XR_039860 /// XR_039861 /// XR_039862	283314	587743	---	ENSG00000205885	Q6UWM6	AL833364	---	---	---	---	Human Genome U133 Plus 2.0 Array	Affymetrix NetAffx website
1560327_at	---	---	---	---	---	589716	---	---	---	AW172311	---	---	---	---	Human Genome U133 Plus 2.0 Array	Affymetrix NetAffx website
1560445_x_at	ARHGEF1	Rho guanine nucleotide exchange factor (GEF) 1	19q13.13	NM_004706 /// NM_198977 /// NM_199002	9138	631550	601855	---	Q49AN3 /// Q6NX52 /// Q92888	AK026781	<a target="external" href="http://www.wikipathways.org/index.php/Pathway:Homo_sapiens:G13_Signaling_Pathway">G13_Signaling_Pathway</a> /// <a target="external" href="http://www.wikipathways.org/index.php/Pathway:Homo_sapiens:G_Protein_Signaling">G_Protein_Signaling</a>	Rho protein signal transduction /// cell proliferation /// regulation of Rho protein signal transduction	guanyl-nucleotide exchange factor activity /// Rho guanyl-nucleotide exchange factor activity /// Rho guanyl-nucleotide exchange factor activity /// GTPase activator activity /// protein binding	intracellular /// cytoplasm /// cytoplasm /// plasma membrane /// membrane	Human Genome U133 Plus 2.0 Array	Affymetrix NetAffx website
1560477_a_at	SAMD11	sterile alpha motif domain containing 11	1p36.33	NM_152486	148398	335293	---	ENSG00000187634	A6NFK7 /// Q5SV95 /// Q96NU1	AK054643	---	---	---	nucleus	Human Genome U133 Plus 2.0 Array	Affymetrix NetAffx website
1560587_s_at	PRDX5	peroxiredoxin 5	11q13	NM_012094 /// NM_181651 /// NM_181652	25824	502823	606583	ENSG00000126432	A6NC19 /// A6NG06 /// A8MVL5 /// P30044	AI718223	---	inflammatory response /// response to oxidative stress	peroxidase activity /// peroxidase activity /// antioxidant activity /// oxidoreductase activity /// peroxiredoxin activity	cytoplasm /// mitochondrion /// mitochondrion /// peroxisome /// peroxisome	Human Genome U133 Plus 2.0 Array	Affymetrix NetAffx website
1560622_at	---	---	---	---	---	664322	---	---	---	AK000203	---	---	---	---	Human Genome U133 Plus 2.0 Array	Affymetrix NetAffx website
1560818_at	LOC387895	Hypothetical gene supported by BC040060	12q24.32	XM_373553 /// XM_945559	387895	534660	---	---	---	AI138766	---	---	---	---	Human Genome U133 Plus 2.0 Array	Affymetrix NetAffx website
1560916_a_at	DPY19L1	dpy-19-like 1 (C. elegans)	7p14.3	NM_015283	23333	408623	---	ENSG00000173852	Q2PZI1	BI461155	---	---	---	membrane /// integral to membrane	Human Genome U133 Plus 2.0 Array	Affymetrix NetAffx website
1560921_at	ZNF169	zinc finger protein 169	9q22.32	NM_194320	169841	387623	603404	ENSG00000175787	A2AGP5 /// A6NM29 /// A8K127 /// Q14928 /// Q14929 /// Q5SR55 /// Q6PIG1 /// Q6PJ92 /// Q7Z761	AK093956	---	transcription /// regulation of transcription, DNA-dependent /// regulation of transcription, DNA-dependent	nucleic acid binding /// DNA binding /// transcription factor activity /// zinc ion binding /// metal ion binding	intracellular /// nucleus /// nucleus	Human Genome U133 Plus 2.0 Array	Affymetrix NetAffx website
1561254_at	tcag7.1188	hypothetical LOC340340	7q22.3	---	340340	649292	---	---	---	BC040593	---	---	---	---	Human Genome U133 Plus 2.0 Array	Affymetrix NetAffx website
1561387_a_at	FAM55A	family with sequence similarity 55, member A	11q23.2	NM_152315	120400	---	---	ENSG00000095110	Q8N323	BC037844	---	---	---	extracellular region	Human Genome U133 Plus 2.0 Array	Affymetrix NetAffx website
1561421_a_at	---	---	---	---	---	638418 /// 679906	---	---	Q96MA9	AK057259	---	---	---	---	Human Genome U133 Plus 2.0 Array	Affymetrix NetAffx website
1561785_at	MUC4	Mucin 4, cell surface associated	3q29	NM_004532 /// NM_018406 /// NM_138297	4585	369646	158372	---	A0T3F4 /// O75456 /// O76037 /// Q99102 /// Q9UK75 /// Q9UP82	AK074437	---	transport /// cell adhesion /// cell-matrix adhesion	ErbB-2 class receptor binding /// extracellular matrix structural constituent /// transporter activity /// protein binding /// extracellular matrix constituent, lubricant activity	extracellular region /// proteinaceous extracellular matrix /// integral to plasma membrane /// membrane /// membrane /// integral to membrane	Human Genome U133 Plus 2.0 Array	Affymetrix NetAffx website
1561937_x_at	IGHG1	Immunoglobulin heavy constant mu	14q32.33	---	3500	510635	147100	---	A0N5G2 /// A0N5G4 /// A0N5G7 /// A0N8V1 /// A0NA61 /// A2IPH5 /// A2IPH7 /// A2J1M2 /// A2J1M3 /// A2J1M4 /// A2J1M5 /// A2J1M7 /// A2J1N0 /// A2J1N1 /// A2J1N2 /// A2J1N3 /// A2J1N4 /// A2J1N5 /// A2J1N6 /// A2J1N7 /// A2J423 /// A2JA14 /// A2JA17 /// A2JA18 /// A2KBB9 /// A2KBC2 /// A2KBC3 /// A2KBC4 /// A2KBC5 /// A2KBC6 /// A2KBC7 /// A2KBC8 /// A2N011 /// A2N0S5 /// A2N0S6 /// A2N0S7 /// A2N…	M74303	---	activation of MAPK activity /// humoral immune response mediated by circulating immunoglobulin /// immune response /// antigen processing and presentation /// positive regulation of B cell proliferation /// early endosome to late endosome transport /// positive regulation of endocytosis /// positive regulation of peptidyl-tyrosine phosphorylation /// B cell receptor signaling pathway	antigen binding /// antigen binding /// antigen binding /// receptor activity /// transmembrane receptor activity /// copper ion binding /// protein binding /// protein binding /// electron carrier activity	extracellular region /// membrane fraction /// plasma membrane /// integral to plasma membrane /// external side of plasma membrane /// membrane /// membrane /// B cell receptor complex /// immunoglobulin complex, circulating /// perinuclear region of cytoplasm	Human Genome U133 Plus 2.0 Array	Affymetrix NetAffx website
1562062_at	NBPF14 /// NBPF1 /// NBPF3 /// KIAA1245 /// NBPF11 /// NBPF15 /// NBPF20 /// NBPF9 /// NBPF10 /// NBPF8 /// RP3-377D14.1 /// XXyac-YX155B6.1 /// NBPF16 /// LOC100132406	neuroblastoma breakpoint family, member 14 /// neuroblastoma breakpoint family, member 1 /// neuroblastoma breakpoint family, member 3 /// KIAA1245 /// neuroblastoma breakpoint family, member 11 /// neuroblastoma breakpoint family, member 15 /// neuroblastoma breakpoint family, member 20 /// neuroblastoma breakpoint family, member 9 /// neuroblastoma breakpoint family, member 10 /// neuroblastoma…	1p36.12 /// 1p36.13 /// 1q12-q21.2 /// 1q21.1 /// 1q21.2	NM_001037501 /// NM_001037675 /// NM_001039703 /// NM_001101663 /// NM_001102663 /// NM_015383 /// NM_017940 /// NM_032264 /// NM_173638 /// NM_183372 /// XM_001717398 /// XM_001717802 /// XM_001721345 /// XM_001721349 /// XM_001722184 /// XM_001723523 /// XM_001726946	100132406 /// 149013 /// 200030 /// 25832 /// 284565 /// 400818 /// 440670 /// 440673 /// 55672 /// 641559 /// 728841 /// 728912 /// 728936 /// 84224	655246	608607 /// 610414 /// 610501	---	A8K277 /// A8K2N7 /// A8K965 /// A8K9F1 /// Q0VGB5 /// Q3BBV0 /// Q3BBV1 /// Q3BBV2 /// Q3BBV3 /// Q3BBV4 /// Q3BBV5 /// Q3BBV6 /// Q3BBV7 /// Q3BBV8 /// Q3BBW0 /// Q3BBW2 /// Q3BBW3 /// Q4VC10 /// Q5TI25 /// Q5U227 /// Q6P3W6 /// Q86T75 /// Q8IU90 /// Q8IX61 /// Q8IX62 /// Q8IX70 /// Q8IX71 /// Q8IX72 /// Q8IX73 /// Q8IX74 /// Q8IX75 /// Q8IX79 /// Q8IX80 /// Q8IX81 /// Q8IX82 /// Q8IX83 /// Q8I…	BM041211	---	---	---	cytoplasm	Human Genome U133 Plus 2.0 Array	Affymetrix NetAffx website
1562063_x_at	NBPF14 /// NBPF1 /// NBPF3 /// KIAA1245 /// NBPF11 /// NBPF15 /// NBPF20 /// NBPF9 /// NBPF10 /// NBPF8 /// RP3-377D14.1 /// XXyac-YX155B6.1 /// NBPF16 /// LOC100132406	neuroblastoma breakpoint family, member 14 /// neuroblastoma breakpoint family, member 1 /// neuroblastoma breakpoint family, member 3 /// KIAA1245 /// neuroblastoma breakpoint family, member 11 /// neuroblastoma breakpoint family, member 15 /// neuroblastoma breakpoint family, member 20 /// neuroblastoma breakpoint family, member 9 /// neuroblastoma breakpoint family, member 10 /// neuroblastoma…	1p36.12 /// 1p36.13 /// 1q12-q21.2 /// 1q21.1 /// 1q21.2	NM_001037501 /// NM_001037675 /// NM_001039703 /// NM_001101663 /// NM_001102663 /// NM_015383 /// NM_017940 /// NM_032264 /// NM_173638 /// NM_183372 /// XM_001717398 /// XM_001717802 /// XM_001721345 /// XM_001721349 /// XM_001722184 /// XM_001723523 /// XM_001726946	100132406 /// 149013 /// 200030 /// 25832 /// 284565 /// 400818 /// 440670 /// 440673 /// 55672 /// 641559 /// 728841 /// 728912 /// 728936 /// 84224	655246	608607 /// 610414 /// 610501	---	A8K277 /// A8K2N7 /// A8K965 /// A8K9F1 /// Q0VGB5 /// Q3BBV0 /// Q3BBV1 /// Q3BBV2 /// Q3BBV3 /// Q3BBV4 /// Q3BBV5 /// Q3BBV6 /// Q3BBV7 /// Q3BBV8 /// Q3BBW0 /// Q3BBW2 /// Q3BBW3 /// Q4VC10 /// Q5TI25 /// Q5U227 /// Q6P3W6 /// Q86T75 /// Q8IU90 /// Q8IX61 /// Q8IX62 /// Q8IX70 /// Q8IX71 /// Q8IX72 /// Q8IX73 /// Q8IX74 /// Q8IX75 /// Q8IX79 /// Q8IX80 /// Q8IX81 /// Q8IX82 /// Q8IX83 /// Q8I…	BM041211	---	---	---	cytoplasm	Human Genome U133 Plus 2.0 Array	Affymetrix NetAffx website
1562836_at	---	---	---	---	---	408461	---	---	---	AK021715	---	---	---	---	Human Genome U133 Plus 2.0 Array	Affymetrix NetAffx website
1562966_at	KIAA1217	KIAA1217	10p12.2-p12.1	NM_001098500 /// NM_001098501 /// NM_019590	56243	445885	---	ENSG00000120549	A6NLF3 /// Q5T5P0 /// Q5T5P1 /// Q5T5P2	BC017424	---	multicellular organismal development /// embryonic skeletal development	---	cytoplasm /// cytoplasm	Human Genome U133 Plus 2.0 Array	Affymetrix NetAffx website
1562979_at	---	---	---	---	---	621206	---	---	---	BC037412	---	---	---	---	Human Genome U133 Plus 2.0 Array	Affymetrix NetAffx website
1562981_at	HBB	Hemoglobin, beta	11p15.5	NM_000518	3043	523443	141900 /// 603902	---	P68871 /// Q6R7N2 /// Q9UK54	AY034472	---	transport /// regulation of blood pressure /// oxygen transport /// oxygen transport /// oxygen transport /// nitric oxide transport /// positive regulation of nitric oxide biosynthetic process /// regulation of blood vessel size	oxygen transporter activity /// oxygen transporter activity /// iron ion binding /// protein binding /// protein binding /// oxygen binding /// oxygen binding /// heme binding /// hemoglobin binding /// metal ion binding	hemoglobin complex /// hemoglobin complex /// hemoglobin complex	Human Genome U133 Plus 2.0 Array	Affymetrix NetAffx website
1563357_at	---	---	---	---	---	638732	---	---	---	AL049245	---	---	---	---	Human Genome U133 Plus 2.0 Array	Affymetrix NetAffx website
1563431_x_at	CALM3	Calmodulin 3 (phosphorylase kinase, delta)	19q13.2-q13.3	NM_005184	808	515487	114183	---	P62158 /// Q9BRL5	AA807959	<a target="external" href="http://www.wikipathways.org/index.php/Pathway:Homo_sapiens:Calcium_regulation_in_cardiac_cells">Calcium_regulation_in_cardiac_cells</a> /// <a target="external" href="http://www.wikipathways.org/index.php/Pathway:Mus_musculus:Calcium_regulation_in_cardiac_cells">Calcium_regulation_in_cardiac_cells</a> /// <a target="external" href="http://www.wikipathways.org/index.php/…	G-protein coupled receptor protein signaling pathway	calcium ion binding /// calcium ion binding /// protein binding /// protein binding /// protein binding /// protein binding /// N-terminal myristoylation domain binding	cytoplasm /// spindle /// plasma membrane	Human Genome U133 Plus 2.0 Array	Affymetrix NetAffx website
1563509_at	---	---	---	---	---	672089	---	---	---	AL832727	---	---	---	---	Human Genome U133 Plus 2.0 Array	Affymetrix NetAffx website
1563639_a_at	FHAD1	forkhead-associated (FHA) phosphopeptide binding domain 1	1p36.21	XM_001714211 /// XM_934889 /// XM_946265	114827	659997	---	ENSG00000142621	Q0P6F5 /// Q5JYW1 /// Q5JYW2 /// Q5JYW3 /// Q5JYW6 /// Q5JYW7 /// Q8N8D3 /// Q8N9T6 /// Q8NA05 /// Q96PV1	AL833342	---	---	---	---	Human Genome U133 Plus 2.0 Array	Affymetrix NetAffx website
1563674_at	FCRL2	Fc receptor-like 2	1q21	NM_030764 /// NM_138738	79368	437393	606509	ENSG00000132704	A0N0M5 /// A1L307 /// A6NMS0 /// A6NN30 /// Q96LA5	AL833361	---	cell-cell signaling	receptor activity /// SH3/SH2 adaptor activity	soluble fraction /// plasma membrane /// membrane /// integral to membrane /// integral to membrane	Human Genome U133 Plus 2.0 Array	Affymetrix NetAffx website
1563792_at	---	---	---	---	---	---	---	---	---	AK092824	---	---	---	---	Human Genome U133 Plus 2.0 Array	Affymetrix NetAffx website
1564053_a_at	YTHDF3	YTH domain family, member 3	8q12.3	NM_152758	253943	491861	---	ENSG00000185728	Q658Z6 /// Q7Z739 /// Q8N3V9 /// Q8NA80 /// Q96MZ5	AK093081	---	---	---	cytoplasm	Human Genome U133 Plus 2.0 Array	Affymetrix NetAffx website
1564069_at	---	---	---	---	---	634354	---	---	---	AK093987	---	---	---	---	Human Genome U133 Plus 2.0 Array	Affymetrix NetAffx website
1564129_a_at	---	---	---	---	---	675754	---	---	---	AK090801	---	---	---	---	Human Genome U133 Plus 2.0 Array	Affymetrix NetAffx website
1564164_at	C1orf218	chromosome 1 open reading frame 218	1q31.3	NM_019049	54530	---	---	---	Q6P3S1	AL831839	---	---	---	---	Human Genome U133 Plus 2.0 Array	Affymetrix NetAffx website
1564281_at	LOC285708	hypothetical protein LOC285708	5q21.2	---	285708	533011	---	---	---	AK092078	---	---	---	---	Human Genome U133 Plus 2.0 Array	Affymetrix NetAffx website
1564494_s_at	P4HB	procollagen-proline, 2-oxoglutarate 4-dioxygenase (proline 4-hydroxylase), beta polypeptide	17q25	NM_000918	5034	464336	176790	ENSG00000185624	P07237 /// Q8NI86 /// Q96C96	AK075503	---	peptidyl-proline hydroxylation to 4-hydroxy-L-proline /// cell redox homeostasis	protein disulfide isomerase activity /// protein disulfide isomerase activity /// procollagen-proline 4-dioxygenase activity /// procollagen-proline 4-dioxygenase activity /// protein binding /// isomerase activity	extracellular region /// endoplasmic reticulum /// endoplasmic reticulum /// endoplasmic reticulum lumen /// microsome /// ER-Golgi intermediate compartment /// cell surface /// membrane /// melanosome	Human Genome U133 Plus 2.0 Array	Affymetrix NetAffx website
1565162_s_at	MGST1	microsomal glutathione S-transferase 1	12p12.3-p12.1	NM_020300 /// NM_145764 /// NM_145791 /// NM_145792	4257	389700	138330	ENSG00000008394	A8K533 /// P10620 /// Q6LET6	D16947	---	glutathione metabolic process	glutathione transferase activity /// glutathione transferase activity /// transferase activity	mitochondrion /// mitochondrial outer membrane /// mitochondrial inner membrane /// endoplasmic reticulum /// microsome /// membrane	Human Genome U133 Plus 2.0 Array	Affymetrix NetAffx website
1565269_s_at	ATF1	activating transcription factor 1	12q13	NM_005171	466	648565	123803	ENSG00000123268	P18846 /// Q9H4A8	AF047022	<a target="external" href="http://www.wikipathways.org/index.php/Pathway:Homo_sapiens:Smooth_muscle_contraction">Smooth_muscle_contraction</a>	transcription /// regulation of transcription, DNA-dependent	DNA binding /// transcription factor activity /// transcription factor activity /// protein binding /// protein binding /// sequence-specific DNA binding /// protein dimerization activity	nucleus /// transcription factor complex	Human Genome U133 Plus 2.0 Array	Affymetrix NetAffx website
1565358_at	RARA	retinoic acid receptor, alpha	17q21	NM_000964 /// NM_001024809	5914	654583	180240	ENSG00000131759	A8K840 /// A8MUP8 /// P06748 /// P10276 /// Q658K5 /// Q6I9R7	AJ417079	<a target="external" href="http://www.wikipathways.org/index.php/Pathway:Homo_sapiens:Nuclear_Receptors">Nuclear_Receptors</a>	transcription /// regulation of transcription, DNA-dependent /// intracellular protein transport /// nucleocytoplasmic transport /// anti-apoptosis /// response to stress /// centrosome cycle /// signal transduction /// signal transduction /// cell aging /// negative regulation of cell proliferation /// ribosome assembly /// positive regulation of NF-kappaB transcription factor activity	nucleic acid binding /// DNA binding /// transcription factor activity /// transcription factor activity /// steroid hormone receptor activity /// retinoic acid receptor activity /// retinoic acid receptor activity /// transcription coactivator activity /// transcription coactivator activity /// RNA binding /// RNA binding /// receptor activity /// ligand-dependent nuclear receptor activity /// p…	nucleus /// nucleus /// nucleus /// nucleolus /// cytoplasm /// cytoplasm /// centrosome	Human Genome U133 Plus 2.0 Array	Affymetrix NetAffx website
1565483_at	EGFR	epidermal growth factor receptor (erythroblastic leukemia viral (v-erb-b) oncogene homolog, avian)	7p12	NM_005228 /// NM_201282 /// NM_201283 /// NM_201284	1956	488293	131550 /// 211980	---	A2VCQ7 /// A8K2T7 /// A9CB80 /// P00533 /// Q147T7 /// Q2TTR7 /// Q504U8 /// Q59FL8 /// Q68GS5 /// Q68GS6	AF277897	---	ossification /// protein amino acid phosphorylation /// response to stress /// cell cycle /// signal transduction /// cell surface receptor linked signal transduction /// transmembrane receptor protein tyrosine kinase signaling pathway /// epidermal growth factor receptor signaling pathway /// epidermal growth factor receptor signaling pathway /// activation of phospholipase C activity /// cell p…	nucleotide binding /// double-stranded DNA binding /// protein kinase activity /// MAP/ERK kinase kinase activity /// protein tyrosine kinase activity /// protein tyrosine kinase activity /// protein tyrosine kinase activity /// transmembrane receptor protein tyrosine kinase activity /// receptor activity /// transmembrane receptor activity /// epidermal growth factor receptor activity /// epider…	extracellular region /// extracellular space /// nucleus /// cytoplasm /// endosome /// plasma membrane /// plasma membrane /// membrane /// membrane /// integral to membrane /// basolateral plasma membrane /// AP-2 adaptor complex	Human Genome U133 Plus 2.0 Array	Affymetrix NetAffx website
1565484_x_at	EGFR	epidermal growth factor receptor (erythroblastic leukemia viral (v-erb-b) oncogene homolog, avian)	7p12	NM_005228 /// NM_201282 /// NM_201283 /// NM_201284	1956	488293	131550 /// 211980	---	A2VCQ7 /// A8K2T7 /// A9CB80 /// P00533 /// Q147T7 /// Q2TTR7 /// Q504U8 /// Q59FL8 /// Q68GS5 /// Q68GS6	AF277897	---	ossification /// protein amino acid phosphorylation /// response to stress /// cell cycle /// signal transduction /// cell surface receptor linked signal transduction /// transmembrane receptor protein tyrosine kinase signaling pathway /// epidermal growth factor receptor signaling pathway /// epidermal growth factor receptor signaling pathway /// activation of phospholipase C activity /// cell p…	nucleotide binding /// double-stranded DNA binding /// protein kinase activity /// MAP/ERK kinase kinase activity /// protein tyrosine kinase activity /// protein tyrosine kinase activity /// protein tyrosine kinase activity /// transmembrane receptor protein tyrosine kinase activity /// receptor activity /// transmembrane receptor activity /// epidermal growth factor receptor activity /// epider…	extracellular region /// extracellular space /// nucleus /// cytoplasm /// endosome /// plasma membrane /// plasma membrane /// membrane /// membrane /// integral to membrane /// basolateral plasma membrane /// AP-2 adaptor complex	Human Genome U133 Plus 2.0 Array	Affymetrix NetAffx website
1565651_at	ARF1	ADP-ribosylation factor 1	1q42	NM_001024226 /// NM_001024227 /// NM_001024228 /// NM_001658	375	286221	103180	---	P84077	BI868311	---	transport /// small GTPase mediated signal transduction /// protein transport /// vesicle-mediated transport	nucleotide binding /// GTPase activity /// receptor signaling protein activity /// protein binding /// GTP binding	intracellular /// Golgi apparatus /// cytosol /// plasma membrane /// endomembrane system /// sarcomere	Human Genome U133 Plus 2.0 Array	Affymetrix NetAffx website
1565662_at	---	---	---	---	---	703727	---	---	Q6W4X9	BF476613	---	maintenance of gastrointestinal epithelium	extracellular matrix structural constituent	extracellular region /// extracellular region	Human Genome U133 Plus 2.0 Array	Affymetrix NetAffx website
1565717_s_at	FUS	fusion (involved in t(12;16) in malignant liposarcoma)	16p11.2	NM_004960	2521	513522	137070	ENSG00000089280	A6NH48 /// A6NMX6 /// A8K4H1 /// P35637 /// P35638 /// Q13344 /// Q16273 /// Q59H57 /// Q6IBQ5 /// Q8TBR3	BE930017	<a target="external" href="http://www.wikipathways.org/index.php/Pathway:Homo_sapiens:mRNA_processing_Reactome">mRNA_processing_Reactome</a>	response to amphetamine /// transcription /// regulation of transcription, DNA-dependent /// regulation of transcription, DNA-dependent /// immune response /// response to DNA damage stimulus /// response to oxidative stress /// ER overload response /// cell cycle /// cell cycle arrest /// aging /// response to nutrient /// regulation of cell redox homeostasis /// unfolded protein response /// ne…	nucleotide binding /// nucleic acid binding /// DNA binding /// DNA binding /// transcription factor activity /// transcription factor activity /// transcription corepressor activity /// RNA binding /// RNA binding /// tumor necrosis factor receptor binding /// protein binding /// zinc ion binding /// sequence-specific DNA binding /// metal ion binding /// protein dimerization activity	intracellular /// nucleus /// nucleus /// cytoplasm /// membrane	Human Genome U133 Plus 2.0 Array	Affymetrix NetAffx website
1565752_at	FGD2	FYVE, RhoGEF and PH domain containing 2	6p21.2	NM_173558	221472	509664	605091	---	A8K304 /// Q7Z6J4	BU430052	---	cytoskeleton organization and biogenesis /// regulation of cell shape /// actin cytoskeleton organization and biogenesis /// regulation of Rho protein signal transduction /// regulation of Cdc42 GTPase activity /// filopodium formation	guanyl-nucleotide exchange factor activity /// guanyl-nucleotide exchange factor activity /// Rho guanyl-nucleotide exchange factor activity /// protein binding /// zinc ion binding /// small GTPase binding /// metal ion binding	ruffle /// intracellular /// cytoplasm /// cytoplasm /// Golgi apparatus /// cytoskeleton /// lamellipodium	Human Genome U133 Plus 2.0 Array	Affymetrix NetAffx website
1565754_x_at	FGD2	FYVE, RhoGEF and PH domain containing 2	6p21.2	NM_173558	221472	509664	605091	---	A8K304 /// Q7Z6J4	BU430052	---	cytoskeleton organization and biogenesis /// regulation of cell shape /// actin cytoskeleton organization and biogenesis /// regulation of Rho protein signal transduction /// regulation of Cdc42 GTPase activity /// filopodium formation	guanyl-nucleotide exchange factor activity /// guanyl-nucleotide exchange factor activity /// Rho guanyl-nucleotide exchange factor activity /// protein binding /// zinc ion binding /// small GTPase binding /// metal ion binding	ruffle /// intracellular /// cytoplasm /// cytoplasm /// Golgi apparatus /// cytoskeleton /// lamellipodium	Human Genome U133 Plus 2.0 Array	Affymetrix NetAffx website
1566079_at	LOC647190	similar to 40S ribosomal protein S16	6p12.1	XM_001723027 /// XM_930224 /// XM_941815	647190	675022	---	---	Q6ZWL6	AL833001	---	translation	structural constituent of ribosome	intracellular /// ribosome /// ribonucleoprotein complex	Human Genome U133 Plus 2.0 Array	Affymetrix NetAffx website
1566177_at	---	---	---	---	---	130690	---	---	---	AL713731	---	---	---	---	Human Genome U133 Plus 2.0 Array	Affymetrix NetAffx website
1566178_x_at	---	---	---	---	---	130690	---	---	---	AL713731	---	---	---	---	Human Genome U133 Plus 2.0 Array	Affymetrix NetAffx website
1566303_s_at	PPP1R11	protein phosphatase 1, regulatory (inhibitor) subunit 11	6p21.3	NM_021959	6992	82887	606670	ENSG00000112498 /// ENSG00000204619 /// ENSG00000206501	A2BEK1 /// O60927 /// Q5SRK2	AV755778	---	---	protein phosphatase inhibitor activity /// protein binding	soluble fraction	Human Genome U133 Plus 2.0 Array	Affymetrix NetAffx website
1566342_at	---	---	---	---	---	702118	---	---	---	R34841	---	---	---	---	Human Genome U133 Plus 2.0 Array	Affymetrix NetAffx website
1566472_s_at	RETSAT	retinol saturase (all-trans-retinol 13,14-reductase)	2p11.2	NM_017750	54884	440401	---	ENSG00000042445	Q6NUM9	AK098125	---	carotenoid biosynthetic process /// retinol metabolic process /// oxidation reduction	electron carrier activity /// oxidoreductase activity /// oxidoreductase activity /// oxidoreductase activity, acting on paired donors, with incorporation or reduction of molecular oxygen /// FAD binding /// all-trans-retinol 13,14-reductase activity /// all-trans-retinol 13,14-reductase activity	nuclear outer membrane /// endoplasmic reticulum /// endoplasmic reticulum membrane /// endoplasmic reticulum membrane /// membrane /// nuclear membrane	Human Genome U133 Plus 2.0 Array	Affymetrix NetAffx website
1566509_s_at	FBXO9	F-box protein 9	6p12.3-p11.2	NM_012347 /// NM_033480 /// NM_033481	26268	216653	609091	ENSG00000112146	Q4W8W0 /// Q59EH8 /// Q96MK9 /// Q9UK97	AK095315	---	ubiquitin cycle /// protein ubiquitination	ubiquitin-protein ligase activity	ubiquitin ligase complex	Human Genome U133 Plus 2.0 Array	Affymetrix NetAffx website
1566512_at	---	---	---	---	---	---	---	---	---	AK091506	---	---	---	---	Human Genome U133 Plus 2.0 Array	Affymetrix NetAffx website
1566558_x_at	FLJ90757	hypothetical protein LOC440465	17q25.3	XR_017883 /// XR_017982 /// XR_040055	440465	448889	---	ENSG00000175901	Q8NBT7	AK096609	---	---	---	---	Human Genome U133 Plus 2.0 Array	Affymetrix NetAffx website
1566887_x_at	---	---	---	---	---	568361	---	---	---	AY094612	---	---	---	---	Human Genome U133 Plus 2.0 Array	Affymetrix NetAffx website
1567014_s_at	NFE2L2	nuclear factor (erythroid-derived 2)-like 2	2q31	NM_006164	4780	155396	600492	---	Q16236 /// Q9BZF8	AF323119	---	transcription /// regulation of transcription, DNA-dependent /// transcription from RNA polymerase II promoter /// regulation of transcription	DNA binding /// transcription factor activity /// transcription factor activity /// sequence-specific DNA binding /// protein dimerization activity	nucleus /// cytoplasm	Human Genome U133 Plus 2.0 Array	Affymetrix NetAffx website
1567107_s_at	TPM4	tropomyosin 4	19p13.1	NM_003290	7171	631618	600317	ENSG00000167460	P67936 /// Q5U0D9	AF362887	<a target="external" href="http://www.wikipathways.org/index.php/Pathway:Homo_sapiens:Striated_muscle_contraction">Striated_muscle_contraction</a>	cell motility	actin binding /// structural constituent of muscle	podosome /// cytoplasm /// cytoskeleton /// cytoskeleton /// muscle thin filament tropomyosin /// cortical cytoskeleton /// filamentous actin	Human Genome U133 Plus 2.0 Array	Affymetrix NetAffx website
1567213_at	PNN	pinin, desmosome associated protein	14q21.1	NM_002687	5411	409965	603154	---	A8K964 /// Q15789 /// Q9H307	U59479	---	transcription /// regulation of transcription, DNA-dependent /// mRNA processing /// cell cycle /// cell adhesion /// RNA splicing /// negative regulation of cell cycle	DNA binding /// structural molecule activity /// protein binding	nucleus /// spliceosome /// cytoplasm /// intermediate filament /// plasma membrane /// intercellular junction /// nuclear speck /// cell junction	Human Genome U133 Plus 2.0 Array	Affymetrix NetAffx website
1567214_a_at	PNN	pinin, desmosome associated protein	14q21.1	NM_002687	5411	409965	603154	ENSG00000100941	A8K964 /// Q15789 /// Q9H307	U59479	---	transcription /// regulation of transcription, DNA-dependent /// mRNA processing /// cell cycle /// cell adhesion /// RNA splicing /// negative regulation of cell cycle	DNA binding /// structural molecule activity /// protein binding	nucleus /// spliceosome /// cytoplasm /// intermediate filament /// plasma membrane /// intercellular junction /// nuclear speck /// cell junction	Human Genome U133 Plus 2.0 Array	Affymetrix NetAffx website
1567458_s_at	RAC1	ras-related C3 botulinum toxin substrate 1 (rho family, small GTP binding protein Rac1)	7p22	NM_006908 /// NM_018890 /// NM_198829	5879	413812	602048	ENSG00000136238	A4D2P0 /// A4D2P1 /// A4D2P2 /// P63000 /// Q59FQ0	AJ012502	<a target="external" href="http://www.wikipathways.org/index.php/Pathway:Homo_sapiens:G13_Signaling_Pathway">G13_Signaling_Pathway</a> /// <a target="external" href="http://www.wikipathways.org/index.php/Pathway:Mus_musculus:G13_Signaling_Pathway">G13_Signaling_Pathway</a> /// <a target="external" href="http://www.wikipathways.org/index.php/Pathway:Homo_sapiens:Integrin-mediated_cell_adhesion_KEG…	cell motility /// inflammatory response /// cell adhesion /// intracellular signaling cascade /// small GTPase mediated signal transduction /// response to wounding /// anatomical structure morphogenesis /// lamellipodium biogenesis /// actin filament polymerization /// ruffle organization and biogenesis /// positive regulation of Rho protein signal transduction /// negative regulation of recepto…	nucleotide binding /// GTPase activity /// protein binding /// GTP binding /// GTP-dependent protein binding	intracellular /// plasma membrane /// membrane /// melanosome	Human Genome U133 Plus 2.0 Array	Affymetrix NetAffx website
1567628_at	CD74	CD74 molecule, major histocompatibility complex, class II invariant chain	5q32	NM_001025158 /// NM_001025159 /// NM_004355	972	709190	142790	ENSG00000019582	A8K7R1 /// O19685 /// O78208 /// P04233 /// Q8SNA0 /// Q9TNQ4 /// Q9TNQ6	M28590	---	prostaglandin biosynthetic process /// protein complex assembly /// intracellular protein transport /// intracellular protein transport /// immune response /// signal transduction /// cell proliferation /// immunoglobulin mediated immune response /// antigen processing and presentation /// antigen processing and presentation of endogenous antigen /// regulation of macrophage activation /// negati…	cytokine binding /// MHC class II protein binding /// MHC class II protein binding /// identical protein binding	intracellular /// membrane /// integral to membrane /// integral to membrane	Human Genome U133 Plus 2.0 Array	Affymetrix NetAffx website
1568249_at	SNORA71B /// LOC388796	small nucleolar RNA, H/ACA box 71B /// hypothetical LOC388796	20q11.23	NR_002910 /// NR_015366 /// XM_001720823 /// XM_001720894 /// XM_001721371	26776 /// 388796	400876	---	ENSG00000201416	---	Y11166	---	---	---	---	Human Genome U133 Plus 2.0 Array	Affymetrix NetAffx website
1568598_at	KAZALD1	Kazal-type serine peptidase inhibitor domain 1	10q24.31	NM_030929	81621	632079	609208	---	Q96I82	BF434771	---	ossification /// regulation of cell growth /// multicellular organismal development /// cell differentiation	insulin-like growth factor binding	extracellular region	Human Genome U133 Plus 2.0 Array	Affymetrix NetAffx website
1568600_at	CALML4	calmodulin-like 4	15q23	NM_001031733 /// NM_033429	91860	709550	---	ENSG00000129007	Q6MZY3 /// Q96GE6	AA741090	---	---	calcium ion binding	---	Human Genome U133 Plus 2.0 Array	Affymetrix NetAffx website
1568609_s_at	FAM91A2 /// FLJ39739	family with sequence similarity 91, member A2 /// hypothetical FLJ39739	1q21.1	XR_039904 /// XR_039905 /// XR_040635	388685 /// 57234	713362	---	ENSG00000178669 /// ENSG00000215863	Q8N8A9	AL118843	---	---	---	---	Human Genome U133 Plus 2.0 Array	Affymetrix NetAffx website
1568618_a_at	GALNT1	UDP-N-acetyl-alpha-D-galactosamine:polypeptide N-acetylgalactosaminyltransferase 1 (GalNAc-T1)	18q12.1	NM_020474	2589	514806	602273	ENSG00000141429	A8KAJ7 /// Q05BM8 /// Q10472 /// Q68VJ7	BC038440	---	protein amino acid O-linked glycosylation /// protein amino acid O-linked glycosylation /// protein amino acid O-linked glycosylation via serine /// protein amino acid O-linked glycosylation via threonine	polypeptide N-acetylgalactosaminyltransferase activity /// polypeptide N-acetylgalactosaminyltransferase activity /// polypeptide N-acetylgalactosaminyltransferase activity /// calcium ion binding /// sugar binding /// transferase activity /// transferase activity, transferring glycosyl groups /// manganese ion binding /// manganese ion binding	extracellular region /// Golgi apparatus /// Golgi apparatus /// membrane /// integral to membrane /// perinuclear region of cytoplasm	Human Genome U133 Plus 2.0 Array	Affymetrix NetAffx website
1568619_s_at	LOC162073	hypothetical protein LOC162073	16p12.3	NM_001034841	162073	648523	---	---	Q3MIP1	BC015343	---	---	---	---	Human Genome U133 Plus 2.0 Array	Affymetrix NetAffx website
1568634_a_at	LOC339977	similar to hypothetical protein MGC38937	4q12	NM_001024611	339977	661450	---	ENSG00000188993	Q68CR7	BU620718	---	---	protein binding	membrane /// integral to membrane	Human Genome U133 Plus 2.0 Array	Affymetrix NetAffx website
1568678_s_at	FGFR1OP	FGFR1 oncogene partner	6q27	NM_007045 /// NM_194429	11116	487175	605392	ENSG00000213066	A8K1D1 /// O95684	BC037785	---	positive regulation of cell proliferation	---	centrosome	Human Genome U133 Plus 2.0 Array	Affymetrix NetAffx website
1568704_a_at	CHERP	calcium homeostasis endoplasmic reticulum protein	19p13.1	NM_006387	10523	631627	---	---	Q59ET1 /// Q8IWX8	BF511683	---	RNA processing /// nervous system development	nucleic acid binding /// RNA binding	intracellular /// cytoplasm /// endoplasmic reticulum	Human Genome U133 Plus 2.0 Array	Affymetrix NetAffx website
1568718_at	SLC22A23	solute carrier family 22, member 23	6p25.2	NM_015482 /// NM_021945	63027	709379	611697	ENSG00000137266	A1A5C7 /// Q5JS57 /// Q7L9D0 /// Q9UFY2	BC038748	---	transport /// ion transport	transporter activity	membrane /// integral to membrane	Human Genome U133 Plus 2.0 Array	Affymetrix NetAffx website
1568780_at	LOC649305	hypothetical protein LOC649305	---	XM_001722373 /// XM_001726970	649305	638932	---	---	Q4G118	BC030211	---	---	---	---	Human Genome U133 Plus 2.0 Array	Affymetrix NetAffx website
1568954_s_at	C16orf72	chromosome 16 open reading frame 72	16p13.2	NM_014117	29035	221497	---	ENSG00000182831	Q14CZ0	BG403486	---	---	---	---	Human Genome U133 Plus 2.0 Array	Affymetrix NetAffx website
1568986_x_at	PIGT	phosphatidylinositol glycan anchor biosynthesis, class T	20q12-q13.12	NM_015937	51604	437388	610272	---	Q969N2 /// Q96JR8	AF305815	---	GPI anchor biosynthetic process /// attachment of GPI anchor to protein	GPI-anchor transamidase activity /// protein binding	endoplasmic reticulum /// endoplasmic reticulum membrane /// membrane /// integral to membrane /// integral to endoplasmic reticulum membrane /// GPI-anchor transamidase complex /// GPI-anchor transamidase complex	Human Genome U133 Plus 2.0 Array	Affymetrix NetAffx website
1569003_at	TMEM49	transmembrane protein 49	17q23.1	NM_030938	81671	444569	611753	---	Q96GC9	AL541655	---	---	---	endoplasmic reticulum /// endoplasmic reticulum /// ER-Golgi intermediate compartment /// Golgi apparatus /// membrane /// integral to membrane	Human Genome U133 Plus 2.0 Array	Affymetrix NetAffx website
1569040_s_at	FLJ40330 /// LOC730272	hypothetical LOC645784 /// similar to protein immuno-reactive with anti-PTH polyclonal antibodies	2p11.2	XR_015919 /// XR_041839 /// XR_041840 /// XR_041841	645784 /// 730272	105323	---	---	---	AA632139	---	---	---	---	Human Genome U133 Plus 2.0 Array	Affymetrix NetAffx website
1569057_s_at	MIA3	melanoma inhibitory activity family, member 3	1q41	NM_198551	375056	118474	---	ENSG00000154305	A8K2S0 /// A8MT05 /// A8MT13 /// A8MX42 /// Q3S4X3 /// Q5JRA6 /// Q5JRB0	BC031805	---	positive regulation of leukocyte migration /// negative regulation of cell adhesion /// negative regulation of cell migration /// wound healing	protein binding	membrane /// integral to membrane	Human Genome U133 Plus 2.0 Array	Affymetrix NetAffx website
1569090_x_at	FLJ35390	hypothetical LOC255031	7p13	---	255031	633978	---	---	---	BC024303	---	---	---	---	Human Genome U133 Plus 2.0 Array	Affymetrix NetAffx website
1569091_at	---	---	---	---	---	677564	---	---	---	BC039458	---	---	---	---	Human Genome U133 Plus 2.0 Array	Affymetrix NetAffx website
1569095_at	LOC731424	hypothetical protein LOC731424	---	XM_001132858 /// XM_001723759	731424	---	---	---	---	BC016366	---	---	---	---	Human Genome U133 Plus 2.0 Array	Affymetrix NetAffx website
1569110_x_at	LOC728613	programmed cell death 6 pseudogene	5p15.33	NR_003713	728613	379186	---	ENSG00000188002	A7E2U1 /// B0AZT1 /// Q4G0N5 /// Q6NVW0 /// Q7Z6L2 /// Q96L05	BC020552	---	---	calcium ion binding /// electron carrier activity /// oxidoreductase activity	---	Human Genome U133 Plus 2.0 Array	Affymetrix NetAffx website
1569132_s_at	ARSK	Arylsulfatase family, member K	5q15	NM_198150	153642	585051	610011	---	Q3ZCW3 /// Q6UWY0 /// Q86W75	BC015723	---	metabolic process	catalytic activity /// arylsulfatase activity /// calcium ion binding /// sulfuric ester hydrolase activity /// hydrolase activity /// metal ion binding	extracellular region	Human Genome U133 Plus 2.0 Array	Affymetrix NetAffx website
1569200_at	---	---	---	---	---	657817	---	---	---	BF847120	---	---	---	---	Human Genome U133 Plus 2.0 Array	Affymetrix NetAffx website
1569202_x_at	---	---	---	---	---	657817	---	---	---	BF847120	---	---	---	---	Human Genome U133 Plus 2.0 Array	Affymetrix NetAffx website
1569453_a_at	LOC692247	hypothetical locus LOC692247	11p15.5	---	692247	560022	---	---	Q8N9U2	BG772667	---	---	---	---	Human Genome U133 Plus 2.0 Array	Affymetrix NetAffx website
1569522_at	LOC100132767	hypothetical protein LOC100132767	16p11.2	XM_001720251 /// XM_001725561	100132767	---	---	---	---	BC015443	---	---	---	---	Human Genome U133 Plus 2.0 Array	Affymetrix NetAffx website
1569583_at	EREG	epiregulin	4q13.3	NM_001432	2069	115263	602061	---	O14944	BC035806	---	angiogenesis /// ovarian cumulus expansion /// ovarian cumulus expansion /// oocyte maturation /// oocyte maturation /// positive regulation of cytokine production /// positive regulation of cytokine production /// female meiosis /// female meiosis /// epidermal growth factor receptor signaling pathway /// epidermal growth factor receptor signaling pathway /// cell-cell signaling /// multicellula…	epidermal growth factor receptor binding /// epidermal growth factor receptor binding /// epidermal growth factor receptor binding /// protein binding /// growth factor activity /// protein heterodimerization activity	extracellular region /// extracellular space /// integral to plasma membrane /// membrane /// integral to membrane	Human Genome U133 Plus 2.0 Array	Affymetrix NetAffx website
1569607_s_at	ANKRD20A1 /// C21orf81 /// LOC284232 /// LOC391267 /// ANKRD20A3 /// ANKRD20A2 /// LOC643187 /// LOC647595 /// LOC653436 /// LOC727770 /// ANKRD20A4 /// LOC728783 /// CCDC29 /// LOC100132733	ankyrin repeat domain 20 family, member A1 /// chromosome 21 open reading frame 81 /// similar to ankyrin repeat domain 20 family, member A2 /// similar to ankyrin repeat domain 20 family, member A2 /// ankyrin repeat domain 20 family, member A3 /// ankyrin repeat domain 20 family, member A2 /// hypothetical LOC643187 /// similar to ankyrin repeat domain 20A /// hypothetical LOC653436 /// similar…	13q11 /// 1q12 /// 21q11.2 /// 9p11.2 /// 9p12-p11.2 /// 9q12	NM_001012419 /// NM_001012421 /// NM_001098805 /// NM_001098806 /// NM_032250 /// XM_001715342 /// XM_001716758 /// XR_015129 /// XR_018156 /// XR_018826 /// XR_037011 /// XR_037095 /// XR_037208 /// XR_037226 /// XR_037379 /// XR_040134 /// XR_040135 /// XR_042306 /// XR_042478	100132733 /// 114035 /// 284232 /// 391267 /// 441425 /// 441430 /// 643187 /// 647595 /// 653436 /// 727770 /// 728747 /// 728783 /// 728788 /// 84210	632663	---	ENSG00000132498 /// ENSG00000172014 /// ENSG00000183148 /// ENSG00000196774 /// ENSG00000215559	Q49A76 /// Q4UJ75 /// Q4UJ76 /// Q4UJ79 /// Q5SQ80 /// Q5TYW2 /// Q5VUR7 /// Q8NFU9	BC016022	---	---	---	plasma membrane	Human Genome U133 Plus 2.0 Array	Affymetrix NetAffx website
1569935_at	ZNF664	Zinc finger protein 664	12q24.31	NM_152437	144348	524828	---	---	O14847 /// Q0P6D9 /// Q8N3J9	BC033539	---	transcription /// regulation of transcription, DNA-dependent	nucleic acid binding /// DNA binding /// zinc ion binding /// metal ion binding	intracellular /// nucleus /// nucleus	Human Genome U133 Plus 2.0 Array	Affymetrix NetAffx website
1569952_x_at	---	---	---	---	---	454036	---	---	---	BC030617	---	---	---	---	Human Genome U133 Plus 2.0 Array	Affymetrix NetAffx website
1570055_at	LOC554175	hypothetical LOC554175	15q23	XR_016015 /// XR_040089 /// XR_040090	554175	646517	---	---	Q6PK57	BC006530	---	---	GTPase activity /// GTP binding	---	Human Genome U133 Plus 2.0 Array	Affymetrix NetAffx website
1570210_x_at	SAPS2	SAPS domain family, member 2	22q13.33	NM_014678	9701	449098	610877	---	O75170 /// Q5U5P3 /// Q7Z2L2 /// Q7Z731	BC022346	---	---	---	cytoplasm	Human Genome U133 Plus 2.0 Array	Affymetrix NetAffx website
1570242_x_at	SPATA21	spermatogenesis associated 21	1p36.13	NM_198546	374955	705501	---	ENSG00000187144	Q5VXG6 /// Q6ZRN2 /// Q7Z572	BC022039	---	---	calcium ion binding	---	Human Genome U133 Plus 2.0 Array	Affymetrix NetAffx website
1598_g_at	GAS6 /// LOC100133684	growth arrest-specific 6 /// similar to growth arrest-specific 6	13q34	NM_000820 /// XM_001716774	100133684 /// 2621	646346	600441	ENSG00000183087	Q14393 /// Q658L2	L13720	---	regulation of cell growth /// signal transduction /// cell proliferation	receptor binding /// calcium ion binding /// metal ion binding	extracellular region	Human Genome U133 Plus 2.0 Array	Affymetrix NetAffx website
1861_at	BAD	BCL2-antagonist of cell death	11q13.1	NM_004322 /// NM_032989	572	370254	603167	ENSG00000002330	A8MXU7 /// Q6FH21 /// Q92934	U66879	<a target="external" href="http://www.wikipathways.org/index.php/Pathway:Homo_sapiens:Apoptosis">Apoptosis</a> /// <a target="external" href="http://www.wikipathways.org/index.php/Pathway:Homo_sapiens:Apoptosis_KEGG">Apoptosis_KEGG</a>	apoptosis /// induction of apoptosis /// apoptotic program	protein binding /// protein binding	cytoplasm /// cytoplasm /// mitochondrion /// mitochondrial outer membrane /// mitochondrial outer membrane /// membrane	Human Genome U133 Plus 2.0 Array	Affymetrix NetAffx website
200008_s_at	GDI2	GDP dissociation inhibitor 2	10p15	NM_001115156 /// NM_001494	2665	299055	600767	ENSG00000057608	P50395 /// Q5SX86 /// Q5SX87 /// Q5SX88 /// Q5SX90 /// Q5SX91 /// Q6IAT1 /// Q8TB95	D13988	---	signal transduction /// protein transport /// regulation of GTPase activity	Rab GDP-dissociation inhibitor activity /// Rab GDP-dissociation inhibitor activity /// GTPase activator activity	cytoplasm /// cytoplasm /// cell surface /// membrane	Human Genome U133 Plus 2.0 Array	Affymetrix NetAffx website
200033_at	DDX5	DEAD (Asp-Glu-Ala-Asp) box polypeptide 5	17q21	NM_004396	1655	279806	180630	ENSG00000108654	P17844 /// Q59E92 /// Q7Z2V5	NM_004396	---	mRNA processing /// RNA splicing /// cell growth	nucleotide binding /// nucleic acid binding /// RNA binding /// RNA helicase activity /// helicase activity /// protein binding /// ATP binding /// ATP-dependent helicase activity /// hydrolase activity	nucleus /// nucleus /// spliceosome	Human Genome U133 Plus 2.0 Array	Affymetrix NetAffx website
200041_s_at	BAT1	HLA-B associated transcript 1	6p21.3	NM_004640 /// NM_080598	7919	254042	142560	ENSG00000198563 /// ENSG00000215412 /// ENSG00000215425	A2AB30 /// A2AB32 /// A2AB34 /// A2BF52 /// A2BF54 /// A2BF55 /// A2BF56 /// A2BF57 /// A2BF59 /// A2BF61 /// Q13838 /// Q59G92 /// Q5HYT6 /// Q5STA0 /// Q5STA2 /// Q5STU3 /// Q5STU9 /// Q7KYK3	NM_004640	---	nuclear mRNA splicing, via spliceosome /// mRNA processing /// mRNA export from nucleus /// RNA splicing	nucleotide binding /// nucleic acid binding /// RNA binding /// ATP-dependent RNA helicase activity /// helicase activity /// protein binding /// ATP binding /// ATP-dependent helicase activity /// hydrolase activity /// identical protein binding	nucleus /// nucleus /// spliceosome	Human Genome U133 Plus 2.0 Array	Affymetrix NetAffx website
200597_at	EIF3A	eukaryotic translation initiation factor 3, subunit A	10q26	NM_003750	8661	523299	602039	ENSG00000107581	B1AMV5 /// Q05BS0 /// Q14152 /// Q24JU4 /// Q3B770 /// Q6P1R0 /// Q7Z5T5	AI123320	<a target="external" href="http://www.wikipathways.org/index.php/Pathway:Homo_sapiens:Translation_Factors">Translation_Factors</a>	translation /// regulation of translational initiation	structural constituent of ribosome /// translation initiation factor activity /// structural molecule activity /// protein binding /// translation factor activity, nucleic acid binding	nucleus /// cytoplasm /// cytoplasm /// ribosome /// eukaryotic translation initiation factor 3 complex	Human Genome U133 Plus 2.0 Array	Affymetrix NetAffx website
200598_s_at	HSP90B1	heat shock protein 90kDa beta (Grp94), member 1	12q24.2-q24.3	NM_003299	7184	192374	191175	ENSG00000166598	P14625 /// Q16251 /// Q59FC6 /// Q5CAQ5 /// Q96GW1	AI582238	---	response to hypoxia /// protein folding /// anti-apoptosis /// anti-apoptosis /// response to stress /// protein transport /// sequestering of calcium ion	nucleotide binding /// RNA binding /// calcium ion binding /// calcium ion binding /// protein binding /// ATP binding /// virion binding /// low-density lipoprotein receptor binding /// unfolded protein binding	cytoplasm /// endoplasmic reticulum /// endoplasmic reticulum /// endoplasmic reticulum lumen /// endoplasmic reticulum lumen /// endoplasmic reticulum membrane /// microsome /// cytosol /// melanosome /// perinuclear region of cytoplasm	Human Genome U133 Plus 2.0 Array	Affymetrix NetAffx website
200600_at	MSN	moesin	Xq11.2-q12	NM_002444	4478	87752	309845	ENSG00000147065	A8MZ70 /// P26038 /// Q6PJT4	NM_002444	---	cell motility	receptor binding /// structural molecule activity /// structural constituent of cytoskeleton /// binding /// protein binding /// cytoskeletal protein binding	cytoplasm /// cytoskeleton /// cytoskeleton /// plasma membrane /// extrinsic to membrane	Human Genome U133 Plus 2.0 Array	Affymetrix NetAffx website
200601_at	ACTN4	actinin, alpha 4	19q13	NM_004924	81	270291	603278 /// 604638	ENSG00000130402	A4K467 /// O43707 /// Q96BG6	U48734	<a target="external" href="http://www.wikipathways.org/index.php/Pathway:Homo_sapiens:Striated_muscle_contraction">Striated_muscle_contraction</a>	response to hypoxia /// positive regulation of sodium:hydrogen antiporter activity /// regulation of apoptosis /// regulation of apoptosis /// positive regulation of pinocytosis /// actin filament bundle formation /// negative regulation of cell motility /// positive regulation of cell motility /// positive regulation of cell motility /// positive regulation of cell motility	nucleoside binding /// actin binding /// actin binding /// integrin binding /// calcium ion binding /// protein binding /// protein binding /// protein homodimerization activity /// protein N-terminus binding /// actin filament binding /// actin filament binding	stress fiber /// nucleus /// nucleus /// cytoplasm /// cytoplasm /// cortical cytoskeleton /// pseudopodium /// pseudopodium /// protein complex /// perinuclear region of cytoplasm	Human Genome U133 Plus 2.0 Array	Affymetrix NetAffx website
200604_s_at	PRKAR1A	protein kinase, cAMP-dependent, regulatory, type I, alpha (tissue specific extinguisher 1)	17q23-q24	NM_002734 /// NM_212471 /// NM_212472	5573	280342	160980 /// 188550 /// 188830 /// 255960 /// 610489	ENSG00000108946	P10644 /// Q68DQ4 /// Q96P62	M18468	<a target="external" href="http://www.wikipathways.org/index.php/Pathway:Homo_sapiens:Calcium_regulation_in_cardiac_cells">Calcium_regulation_in_cardiac_cells</a> /// <a target="external" href="http://www.wikipathways.org/index.php/Pathway:Homo_sapiens:G_Protein_Signaling">G_Protein_Signaling</a> /// <a target="external" href="http://www.wikipathways.org/index.php/Pathway:Homo_sapiens:Smooth_musc…	regulation of protein amino acid phosphorylation /// regulation of transcription from RNA polymerase II promoter /// protein amino acid phosphorylation /// signal transduction /// intracellular signaling cascade	nucleotide binding /// protein binding /// cAMP-dependent protein kinase regulator activity /// cAMP-dependent protein kinase regulator activity /// kinase activity /// cAMP binding	cAMP-dependent protein kinase complex /// protein complex	Human Genome U133 Plus 2.0 Array	Affymetrix NetAffx website
200606_at	DSP	desmoplakin	6p24	NM_001008844 /// NM_004415	1832	519873	125647 /// 605676 /// 607450 /// 607655 /// 609638	ENSG00000096696	A8MUW8 /// P15924 /// Q4LE79 /// Q6ZP16	NM_004415	---	epidermis development /// peptide cross-linking /// keratinocyte differentiation	structural molecule activity /// structural molecule activity /// structural constituent of cytoskeleton /// protein binding /// protein binding, bridging	cornified envelope /// cytoplasm /// cytoskeleton /// intermediate filament /// cell-cell adherens junction	Human Genome U133 Plus 2.0 Array	Affymetrix NetAffx website
200607_s_at	RAD21	RAD21 homolog (S. pombe)	8q24	NM_006265	5885	81848	606462	ENSG00000164754	A8K0E0 /// O60216	BG289967	---	DNA repair /// double-strand break repair /// DNA recombination /// apoptosis /// response to DNA damage stimulus /// cell cycle /// chromosome segregation /// mitosis /// meiotic recombination /// cell division	protein binding	nuclear chromosome /// nucleus	Human Genome U133 Plus 2.0 Array	Affymetrix NetAffx website
200612_s_at	AP2B1	adaptor-related protein complex 2, beta 1 subunit	17q11.2-q12	NM_001030006 /// NM_001282	163	514819	601025	ENSG00000006125	A8K0G3 /// A8K916 /// P63010 /// Q68DI0 /// Q7Z451 /// Q96EL6	NM_001282	---	protein complex assembly /// intracellular protein transport /// vesicle-mediated transport	binding /// protein binding /// protein binding /// protein transporter activity	plasma membrane /// coated pit /// membrane /// membrane coat /// clathrin adaptor complex	Human Genome U133 Plus 2.0 Array	Affymetrix NetAffx website
200615_s_at	AP2B1	adaptor-related protein complex 2, beta 1 subunit	17q11.2-q12	NM_001030006 /// NM_001282	163	514819	601025	ENSG00000006125	A8K0G3 /// A8K916 /// P63010 /// Q68DI0 /// Q7Z451 /// Q96EL6	AL567295	---	protein complex assembly /// intracellular protein transport /// vesicle-mediated transport	binding /// protein binding /// protein binding /// protein transporter activity	plasma membrane /// coated pit /// membrane /// membrane coat /// clathrin adaptor complex	Human Genome U133 Plus 2.0 Array	Affymetrix NetAffx website
200618_at	LASP1	LIM and SH3 protein 1	17q11-q21.3	NM_006148	3927	548018	602920	ENSG00000002834	A8K1D2 /// Q14847	NM_006148	---	transport /// ion transport /// ion transport /// cortical cytoskeleton organization and biogenesis /// cortical cytoskeleton organization and biogenesis	actin binding /// SH3/SH2 adaptor activity /// zinc ion binding /// ion transmembrane transporter activity /// ion transmembrane transporter activity /// metal ion binding	cytoplasm /// cytoskeleton /// cortical actin cytoskeleton /// cortical actin cytoskeleton	Human Genome U133 Plus 2.0 Array	Affymetrix NetAffx website
200623_s_at	CALM1 /// CALM2 /// CALM3	calmodulin 1 (phosphorylase kinase, delta) /// calmodulin 2 (phosphorylase kinase, delta) /// calmodulin 3 (phosphorylase kinase, delta)	14q24-q31 /// 19q13.2-q13.3 /// 2p21	NM_001743 /// NM_005184 /// NM_006888	801 /// 805 /// 808	643483	114180 /// 114182 /// 114183	ENSG00000160014	A8K1M2 /// P62158 /// Q96HY3 /// Q9BRL5	NM_005184	<a target="external" href="http://www.wikipathways.org/index.php/Pathway:Homo_sapiens:Calcium_regulation_in_cardiac_cells">Calcium_regulation_in_cardiac_cells</a> /// <a target="external" href="http://www.wikipathways.org/index.php/Pathway:Mus_musculus:Calcium_regulation_in_cardiac_cells">Calcium_regulation_in_cardiac_cells</a> /// <a target="external" href="http://www.wikipathways.org/index.php/…	G-protein coupled receptor protein signaling pathway	calcium ion binding /// calcium ion binding /// protein binding /// protein binding /// protein binding /// protein binding /// kinase activity /// N-terminal myristoylation domain binding	cytoplasm /// spindle /// plasma membrane	Human Genome U133 Plus 2.0 Array	Affymetrix NetAffx website
200624_s_at	MATR3	matrin 3	5q31.2	NM_018834 /// NM_199189	9782	268939	164015	ENSG00000015479	A8MXP9 /// P43243 /// Q5CZA7 /// Q68D11 /// Q68E03 /// Q9H4N1	AA577695	---	---	nucleotide binding /// nucleic acid binding /// RNA binding /// structural molecule activity /// protein binding /// zinc ion binding /// metal ion binding	intracellular /// nucleus /// nuclear inner membrane /// nuclear matrix	Human Genome U133 Plus 2.0 Array	Affymetrix NetAffx website
200628_s_at	WARS	tryptophanyl-tRNA synthetase	14q32.31	NM_004184 /// NM_173701 /// NM_213645 /// NM_213646	7453	497599	191050	ENSG00000140105	A6NGN1 /// P23381 /// P78534 /// Q502Y0 /// Q53XB6	M61715	---	translation /// translation /// tRNA aminoacylation for protein translation /// tryptophanyl-tRNA aminoacylation /// tryptophanyl-tRNA aminoacylation /// negative regulation of cell proliferation	nucleotide binding /// aminoacyl-tRNA ligase activity /// tryptophan-tRNA ligase activity /// ATP binding /// ligase activity	soluble fraction /// cytoplasm /// cytoplasm	Human Genome U133 Plus 2.0 Array	Affymetrix NetAffx website
200629_at	WARS	tryptophanyl-tRNA synthetase	14q32.31	NM_004184 /// NM_173701 /// NM_213645 /// NM_213646	7453	497599	191050	ENSG00000140105	A6NGN1 /// P23381 /// P78534 /// Q502Y0 /// Q53XB6	NM_004184	---	translation /// translation /// tRNA aminoacylation for protein translation /// tryptophanyl-tRNA aminoacylation /// tryptophanyl-tRNA aminoacylation /// negative regulation of cell proliferation	nucleotide binding /// aminoacyl-tRNA ligase activity /// tryptophan-tRNA ligase activity /// ATP binding /// ligase activity	soluble fraction /// cytoplasm /// cytoplasm	Human Genome U133 Plus 2.0 Array	Affymetrix NetAffx website
200635_s_at	PTPRF	protein tyrosine phosphatase, receptor type, F	1p34	NM_002840 /// NM_130440	5792	272062	179590	ENSG00000142949	A2A437 /// P10586 /// Q308M3 /// Q59FI2 /// Q5T021 /// Q5T022 /// Q5W9G2 /// Q5W9G3 /// Q6PJS2 /// Q7Z3X4 /// Q86WS0 /// Q86XY3	AU145351	---	protein amino acid dephosphorylation /// cell adhesion /// cell adhesion /// transmembrane receptor protein tyrosine phosphatase signaling pathway /// dephosphorylation	phosphoprotein phosphatase activity /// protein tyrosine phosphatase activity /// protein tyrosine phosphatase activity /// receptor activity /// transmembrane receptor protein tyrosine phosphatase activity /// protein binding /// hydrolase activity /// phosphoric monoester hydrolase activity	integral to plasma membrane /// membrane /// integral to membrane	Human Genome U133 Plus 2.0 Array	Affymetrix NetAffx website
200636_s_at	PTPRF	protein tyrosine phosphatase, receptor type, F	1p34	NM_002840 /// NM_130440	5792	272062	179590	ENSG00000142949	A2A437 /// P10586 /// Q308M3 /// Q59FI2 /// Q5T021 /// Q5T022 /// Q5W9G2 /// Q5W9G3 /// Q6PJS2 /// Q7Z3X4 /// Q86WS0 /// Q86XY3	NM_002840	---	protein amino acid dephosphorylation /// cell adhesion /// cell adhesion /// transmembrane receptor protein tyrosine phosphatase signaling pathway /// dephosphorylation	phosphoprotein phosphatase activity /// protein tyrosine phosphatase activity /// protein tyrosine phosphatase activity /// receptor activity /// transmembrane receptor protein tyrosine phosphatase activity /// protein binding /// hydrolase activity /// phosphoric monoester hydrolase activity	integral to plasma membrane /// membrane /// integral to membrane	Human Genome U133 Plus 2.0 Array	Affymetrix NetAffx website
200637_s_at	PTPRF	protein tyrosine phosphatase, receptor type, F	1p34	NM_002840 /// NM_130440	5792	272062	179590	ENSG00000142949	A2A437 /// P10586 /// Q308M3 /// Q59FI2 /// Q5T021 /// Q5T022 /// Q5W9G2 /// Q5W9G3 /// Q6PJS2 /// Q7Z3X4 /// Q86WS0 /// Q86XY3	AI762627	---	protein amino acid dephosphorylation /// cell adhesion /// cell adhesion /// transmembrane receptor protein tyrosine phosphatase signaling pathway /// dephosphorylation	phosphoprotein phosphatase activity /// protein tyrosine phosphatase activity /// protein tyrosine phosphatase activity /// receptor activity /// transmembrane receptor protein tyrosine phosphatase activity /// protein binding /// hydrolase activity /// phosphoric monoester hydrolase activity	integral to plasma membrane /// membrane /// integral to membrane	Human Genome U133 Plus 2.0 Array	Affymetrix NetAffx website
200641_s_at	YWHAZ	tyrosine 3-monooxygenase/tryptophan 5-monooxygenase activation protein, zeta polypeptide	8q23.1	NM_003406 /// NM_145690	7534	492407	601288	ENSG00000164924	A8K1N0 /// B0AZS6 /// P63104 /// Q2F831 /// Q6LD62	U28964	---	anti-apoptosis /// signal transduction	monooxygenase activity /// protein binding /// transcription factor binding /// protein domain specific binding	cytoplasm /// cytoplasm /// melanosome	Human Genome U133 Plus 2.0 Array	Affymetrix NetAffx website
200646_s_at	NUCB1	nucleobindin 1	19q13.2-q13.4	NM_006184	4924	631602	601323	ENSG00000104805	A8K7Q1 /// Q02818 /// Q53GX6 /// Q96BA4	NM_006184	---	---	DNA binding /// DNA binding /// calcium ion binding	extracellular space /// cytoplasm /// ER-Golgi intermediate compartment /// Golgi apparatus /// membrane	Human Genome U133 Plus 2.0 Array	Affymetrix NetAffx website
200648_s_at	GLUL	glutamate-ammonia ligase (glutamine synthetase)	1q31	NM_001033044 /// NM_001033056 /// NM_002065	2752	518525	138290 /// 610015	ENSG00000135821	A1L199 /// A8YXX4 /// P15104 /// Q2TU80 /// Q9NSP3	NM_002065	---	regulation of neurotransmitter levels /// glutamine biosynthetic process /// nitrogen compound metabolic process	catalytic activity /// glutamate-ammonia ligase activity /// ligase activity	cytoplasm /// mitochondrion	Human Genome U133 Plus 2.0 Array	Affymetrix NetAffx website
200649_at	NUCB1	nucleobindin 1	19q13.2-q13.4	NM_006184	4924	631602	601323	ENSG00000104805	A8K7Q1 /// Q02818 /// Q53GX6 /// Q96BA4	BC002356	---	---	DNA binding /// DNA binding /// calcium ion binding	extracellular space /// cytoplasm /// ER-Golgi intermediate compartment /// Golgi apparatus /// membrane	Human Genome U133 Plus 2.0 Array	Affymetrix NetAffx website
200653_s_at	CALM1 /// CALM2 /// CALM3	calmodulin 1 (phosphorylase kinase, delta) /// calmodulin 2 (phosphorylase kinase, delta) /// calmodulin 3 (phosphorylase kinase, delta)	14q24-q31 /// 19q13.2-q13.3 /// 2p21	NM_001743 /// NM_005184 /// NM_006888	801 /// 805 /// 808	643483	114180 /// 114182 /// 114183	ENSG00000198668	A8K1M2 /// P62158 /// Q96HY3 /// Q9BRL5	M27319	<a target="external" href="http://www.wikipathways.org/index.php/Pathway:Homo_sapiens:Calcium_regulation_in_cardiac_cells">Calcium_regulation_in_cardiac_cells</a> /// <a target="external" href="http://www.wikipathways.org/index.php/Pathway:Mus_musculus:Calcium_regulation_in_cardiac_cells">Calcium_regulation_in_cardiac_cells</a> /// <a target="external" href="http://www.wikipathways.org/index.php/…	G-protein coupled receptor protein signaling pathway	calcium ion binding /// calcium ion binding /// protein binding /// protein binding /// protein binding /// protein binding /// kinase activity /// N-terminal myristoylation domain binding	cytoplasm /// spindle /// plasma membrane	Human Genome U133 Plus 2.0 Array	Affymetrix NetAffx website
200664_s_at	DNAJB1	DnaJ (Hsp40) homolog, subfamily B, member 1	19p13.2	NM_006145	3337	515210	604572	ENSG00000132002	P25685 /// Q6FHS4 /// Q6FI51	BG537255	---	protein folding /// response to stress /// response to unfolded protein /// chaperone cofactor-dependent protein folding	heat shock protein binding /// unfolded protein binding	nucleus /// cytoplasm	Human Genome U133 Plus 2.0 Array	Affymetrix NetAffx website
200665_s_at	SPARC	secreted protein, acidic, cysteine-rich (osteonectin)	5q31.3-q32	NM_003118	6678	111779	182120	ENSG00000113140	O00160 /// P09486 /// Q14779 /// Q6IBK4 /// Q6QE20	NM_003118	---	ossification /// transmembrane receptor protein tyrosine kinase signaling pathway	nucleotide binding /// motor activity /// actin binding /// actin binding /// copper ion binding /// calcium ion binding /// calcium ion binding /// calmodulin binding /// calmodulin binding /// collagen binding /// ATP binding /// ATP binding	extracellular region /// extracellular region /// proteinaceous extracellular matrix /// proteinaceous extracellular matrix /// basement membrane /// myosin complex /// unconventional myosin complex	Human Genome U133 Plus 2.0 Array	Affymetrix NetAffx website
200670_at	XBP1	X-box binding protein 1	22q12.1|22q12	NM_001079539 /// NM_005080	7494	437638	125480 /// 194355	---	A8K823 /// P17861	NM_005080	---	transcription /// regulation of transcription, DNA-dependent /// immune response /// regulation of transcription	DNA binding /// DNA binding /// transcription factor activity /// transcription factor activity /// sequence-specific DNA binding /// protein dimerization activity	nucleus /// nucleus	Human Genome U133 Plus 2.0 Array	Affymetrix NetAffx website
200671_s_at	SPTBN1	spectrin, beta, non-erythrocytic 1	2p21	NM_003128 /// NM_178313	6711	503178	182790	ENSG00000115306	Q01082 /// Q53RC4 /// Q8WYB3	N92501	---	barbed-end actin filament capping	actin binding /// actin binding /// structural constituent of cytoskeleton /// structural constituent of cytoskeleton /// protein binding /// calmodulin binding	nucleolus /// cytoplasm /// cytoplasm /// cytoskeleton /// plasma membrane /// spectrin /// spectrin /// membrane	Human Genome U133 Plus 2.0 Array	Affymetrix NetAffx website
200675_at	CD81	CD81 molecule	11p15.5	NM_004356	975	54457	186845	ENSG00000110651	A6NMH8 /// P60033 /// Q59FS9	NM_004356	---	activation of MAPK activity /// phosphatidylinositol biosynthetic process /// defense response /// protein localization /// cell proliferation /// positive regulation of cell proliferation /// phosphoinositide metabolic process /// positive regulation of 1-phosphatidylinositol 4-kinase activity /// entry of virus into host cell /// virion attachment, binding of host cell surface receptor /// posi…	protein binding	integral to plasma membrane /// integral to plasma membrane /// membrane /// integral to membrane	Human Genome U133 Plus 2.0 Array	Affymetrix NetAffx website
200677_at	PTTG1IP	pituitary tumor-transforming 1 interacting protein	21q22.3	NM_004339	754	474010	603784	ENSG00000183255	A8K274 /// A8MXQ1 /// A8MZH8 /// P53801	NM_004339	---	protein import into nucleus /// multicellular organismal development	---	nucleus /// nucleus /// cytoplasm /// cytoplasm /// membrane /// membrane /// integral to membrane	Human Genome U133 Plus 2.0 Array	Affymetrix NetAffx website
200685_at	SFRS11	splicing factor, arginine/serine-rich 11	1p31	NM_004768	9295	479693	602010	---	Q05519 /// Q05BU6 /// Q5HYN2 /// Q6MZM2 /// Q6N079 /// Q6PJB9 /// Q6PJY9 /// Q6PKC9 /// Q8IWE6 /// Q8NI74	AU146237	---	mRNA processing /// mRNA processing /// RNA splicing /// RNA splicing	nucleotide binding /// nucleic acid binding /// RNA binding /// protein binding	nucleus /// nucleus	Human Genome U133 Plus 2.0 Array	Affymetrix NetAffx website
200692_s_at	HSPA9	heat shock 70kDa protein 9 (mortalin)	5q31.1	NM_004134	3313	184233	600548	ENSG00000113013	A1XP52 /// P38646 /// Q1HB43 /// Q2F839 /// Q53H23 /// Q8N1C8	NM_004134	---	protein folding /// protein export from nucleus /// anti-apoptosis /// response to stress	nucleotide binding /// ATP binding /// unfolded protein binding /// unfolded protein binding	cytoplasm /// mitochondrion /// mitochondrion /// cell surface	Human Genome U133 Plus 2.0 Array	Affymetrix NetAffx website
200696_s_at	GSN	gelsolin (amyloidosis, Finnish type)	9q33	NM_000177 /// NM_198252	2934	522373	105120 /// 137350	ENSG00000148180	A2A418 /// A8MUD1 /// A8MYN7 /// P06396 /// Q5T0H7 /// Q5T0H8 /// Q5T0H9 /// Q5T0I0 /// Q5T0I1 /// Q5T0I2 /// Q69YR8 /// Q9NRJ2	NM_000177	---	actin filament polymerization /// actin filament polymerization /// actin filament severing /// actin filament severing /// barbed-end actin filament capping /// barbed-end actin filament capping	actin binding /// calcium ion binding /// calcium ion binding /// protein binding	extracellular region /// extracellular region /// extracellular region /// extracellular region /// cytoplasm /// cytosol /// cytosol /// cytoskeleton /// actin cytoskeleton	Human Genome U133 Plus 2.0 Array	Affymetrix NetAffx website
200701_at	NPC2	Niemann-Pick disease, type C2	14q24.3	NM_006432	10577	433222	601015 /// 607625	ENSG00000119655	P61916 /// Q53HV6	NM_006432	---	phospholipid transport /// regulation of isoprenoid metabolic process /// cholesterol transport /// intracellular sterol transport /// intracellular cholesterol transport /// cholesterol homeostasis /// glycolipid transport	cholesterol binding /// enzyme binding	extracellular region /// lysosome	Human Genome U133 Plus 2.0 Array	Affymetrix NetAffx website
200704_at	LITAF	lipopolysaccharide-induced TNF factor	16p13.13	NM_004862	9516	459940	601098 /// 603795	ENSG00000189067	Q99732	AB034747	---	transcription /// regulation of transcription, DNA-dependent /// regulation of transcription from RNA polymerase II promoter /// apoptosis /// positive regulation of I-kappaB kinase/NF-kappaB cascade	RNA polymerase II transcription factor activity /// signal transducer activity /// protein binding /// WW domain binding	lysosome /// lysosomal membrane /// Golgi apparatus /// membrane	Human Genome U133 Plus 2.0 Array	Affymetrix NetAffx website
200706_s_at	LITAF	lipopolysaccharide-induced TNF factor	16p13.13	NM_004862	9516	459940	601098 /// 603795	ENSG00000189067	Q99732	NM_004862	---	transcription /// regulation of transcription, DNA-dependent /// regulation of transcription from RNA polymerase II promoter /// apoptosis /// positive regulation of I-kappaB kinase/NF-kappaB cascade	RNA polymerase II transcription factor activity /// signal transducer activity /// protein binding /// WW domain binding	lysosome /// lysosomal membrane /// Golgi apparatus /// membrane	Human Genome U133 Plus 2.0 Array	Affymetrix NetAffx website
200709_at	FKBP1A	FK506 binding protein 1A, 12kDa	20p13	NM_000801 /// NM_054014	2280	471933	186945	ENSG00000088832	P62942 /// Q0VDC5 /// Q0VDC6 /// Q1JUQ3 /// Q1JUQ4 /// Q1JUQ5 /// Q5W0X3 /// Q9UH88	NM_000801	<a target="external" href="http://www.wikipathways.org/index.php/Pathway:Homo_sapiens:Calcium_regulation_in_cardiac_cells">Calcium_regulation_in_cardiac_cells</a> /// <a target="external" href="http://www.wikipathways.org/index.php/Pathway:Homo_sapiens:TGF_Beta_Signaling_Pathway">TGF_Beta_Signaling_Pathway</a>	protein folding /// protein folding /// positive regulation of I-kappaB kinase/NF-kappaB cascade	peptidyl-prolyl cis-trans isomerase activity /// signal transducer activity /// receptor activity /// protein binding /// isomerase activity	cytoplasm	Human Genome U133 Plus 2.0 Array	Affymetrix NetAffx website
200710_at	ACADVL	acyl-Coenzyme A dehydrogenase, very long chain	17p13-p11	NM_000018 /// NM_001033859	37	437178	201475 /// 609575	ENSG00000072778	P49748 /// Q53HR2	NM_000018	<a target="external" href="http://www.wikipathways.org/index.php/Pathway:Homo_sapiens:Fatty_Acid_Degradation">Fatty_Acid_Degradation</a> /// <a target="external" href="http://www.wikipathways.org/index.php/Pathway:Homo_sapiens:Mitochondrial_fatty_acid_betaoxidation">Mitochondrial_fatty_acid_betaoxidation</a>	lipid metabolic process /// fatty acid metabolic process /// fatty acid beta-oxidation /// metabolic process /// energy derivation by oxidation of organic compounds /// oxidation reduction	acyl-CoA dehydrogenase activity /// long-chain-acyl-CoA dehydrogenase activity /// electron carrier activity /// oxidoreductase activity /// oxidoreductase activity, acting on the CH-CH group of donors /// FAD binding	mitochondrion /// mitochondrion /// mitochondrial inner membrane /// membrane	Human Genome U133 Plus 2.0 Array	Affymetrix NetAffx website
200712_s_at	MAPRE1	microtubule-associated protein, RP/EB family, member 1	20q11.1-q11.23	NM_012325	22919	472437	603108	ENSG00000101367	A2VCR0 /// Q15691	AI633566	---	cell cycle /// mitosis /// cell proliferation /// negative regulation of microtubule polymerization /// cell division	protein binding /// microtubule binding /// protein C-terminus binding /// microtubule plus-end binding /// microtubule plus-end binding	cytoplasm /// Golgi apparatus /// spindle /// microtubule /// microtubule /// cortical microtubule cytoskeleton	Human Genome U133 Plus 2.0 Array	Affymetrix NetAffx website
200722_s_at	CAPRIN1	cell cycle associated protein 1	11p13	NM_005898 /// NM_203364	4076	471818	601178	ENSG00000135387	Q14444	BG258784	---	---	---	cytoplasm /// integral to plasma membrane /// cell projection	Human Genome U133 Plus 2.0 Array	Affymetrix NetAffx website
200723_s_at	CAPRIN1	cell cycle associated protein 1	11p13	NM_005898 /// NM_203364	4076	471818	601178	ENSG00000135387	Q14444	NM_005898	---	---	---	cytoplasm /// integral to plasma membrane /// cell projection	Human Genome U133 Plus 2.0 Array	Affymetrix NetAffx website
200727_s_at	ACTR2	ARP2 actin-related protein 2 homolog (yeast)	2p14	NM_001005386 /// NM_005722	10097	699451	604221	---	P61160 /// Q8IY98	AA699583	---	cell motility	nucleotide binding /// actin binding /// protein binding /// protein binding /// ATP binding	cytoplasm /// cytoskeleton /// Arp2/3 protein complex /// actin cytoskeleton /// cell projection	Human Genome U133 Plus 2.0 Array	Affymetrix NetAffx website
200729_s_at	ACTR2	ARP2 actin-related protein 2 homolog (yeast)	2p14	NM_001005386 /// NM_005722	10097	699451	604221	ENSG00000138071	P61160 /// Q8IY98	NM_005722	---	cell motility	nucleotide binding /// actin binding /// protein binding /// protein binding /// ATP binding	cytoplasm /// cytoskeleton /// Arp2/3 protein complex /// actin cytoskeleton /// cell projection	Human Genome U133 Plus 2.0 Array	Affymetrix NetAffx website
200730_s_at	PTP4A1	protein tyrosine phosphatase type IVA, member 1	6q12	NM_003463	7803	227777	601585	ENSG00000112245	Q5TCM7 /// Q93096	BF576710	---	protein amino acid dephosphorylation /// cell cycle /// multicellular organismal development /// dephosphorylation	phosphoprotein phosphatase activity /// protein tyrosine phosphatase activity /// protein tyrosine phosphatase activity /// hydrolase activity /// phosphoric monoester hydrolase activity	cytoplasm /// endosome /// early endosome /// endoplasmic reticulum /// spindle /// plasma membrane /// membrane	Human Genome U133 Plus 2.0 Array	Affymetrix NetAffx website
200731_s_at	PTP4A1	protein tyrosine phosphatase type IVA, member 1	6q12	NM_003463	7803	227777	601585	ENSG00000112245	Q5TCM7 /// Q93096	AW165960	---	protein amino acid dephosphorylation /// cell cycle /// multicellular organismal development /// dephosphorylation	phosphoprotein phosphatase activity /// protein tyrosine phosphatase activity /// protein tyrosine phosphatase activity /// hydrolase activity /// phosphoric monoester hydrolase activity	cytoplasm /// endosome /// early endosome /// endoplasmic reticulum /// spindle /// plasma membrane /// membrane	Human Genome U133 Plus 2.0 Array	Affymetrix NetAffx website
200732_s_at	PTP4A1	protein tyrosine phosphatase type IVA, member 1	6q12	NM_003463	7803	227777	601585	ENSG00000112245	Q5TCM7 /// Q93096	AL578310	---	protein amino acid dephosphorylation /// cell cycle /// multicellular organismal development /// dephosphorylation	phosphoprotein phosphatase activity /// protein tyrosine phosphatase activity /// protein tyrosine phosphatase activity /// hydrolase activity /// phosphoric monoester hydrolase activity	cytoplasm /// endosome /// early endosome /// endoplasmic reticulum /// spindle /// plasma membrane /// membrane	Human Genome U133 Plus 2.0 Array	Affymetrix NetAffx website
200733_s_at	PTP4A1	protein tyrosine phosphatase type IVA, member 1	6q12	NM_003463	7803	227777	601585	ENSG00000112245	Q5TCM7 /// Q93096	U48296	---	protein amino acid dephosphorylation /// cell cycle /// multicellular organismal development /// dephosphorylation	phosphoprotein phosphatase activity /// protein tyrosine phosphatase activity /// protein tyrosine phosphatase activity /// hydrolase activity /// phosphoric monoester hydrolase activity	cytoplasm /// endosome /// early endosome /// endoplasmic reticulum /// spindle /// plasma membrane /// membrane	Human Genome U133 Plus 2.0 Array	Affymetrix NetAffx website
200736_s_at	GPX1	glutathione peroxidase 1	3p21.3	NM_000581 /// NM_201397	2876	76686	138320	---	P07203 /// Q6NSD4	NM_000581	---	response to reactive oxygen species /// release of cytochrome c from mitochondria /// glutathione metabolic process /// anti-apoptosis /// response to oxidative stress /// induction of apoptosis by oxidative stress /// UV protection /// response to selenium ion /// regulation of cell redox homeostasis /// regulation of mammary gland epithelial cell proliferation /// regulation of gene expression,…	peroxidase activity /// glutathione peroxidase activity /// glutathione peroxidase activity /// selenium binding /// proteasome inhibitor activity /// oxidoreductase activity /// SH3 domain binding /// glutathione binding	cytoplasm /// cytoplasm /// mitochondrion /// mitochondrion	Human Genome U133 Plus 2.0 Array	Affymetrix NetAffx website
200742_s_at	TPP1	tripeptidyl peptidase I	11p15	NM_000391	1200	523454	204500 /// 607998	ENSG00000166340	O14773 /// Q53HP2	BG231932	---	proteolysis /// proteolysis /// lipid metabolic process /// nervous system development /// protein catabolic process /// peptide catabolic process /// bone resorption /// positive regulation of proteolysis	endopeptidase activity /// endopeptidase activity /// aminopeptidase activity /// serine-type endopeptidase activity /// subtilase activity /// protein binding /// peptidase activity /// peptidase activity /// serine-type peptidase activity /// serine-type peptidase activity /// hydrolase activity /// tripeptidyl-peptidase I activity /// tripeptidyl-peptidase I activity /// tripeptidyl-peptidase …	soluble fraction /// lysosome /// lysosome /// lysosome /// lysosome /// melanosome	Human Genome U133 Plus 2.0 Array	Affymetrix NetAffx website
200745_s_at	GNB1	guanine nucleotide binding protein (G protein), beta polypeptide 1	1p36.33	NM_002074	2782	709208	139380	ENSG00000078369	B1AJZ7 /// P62873 /// Q14396 /// Q1RMY8 /// Q5QPT1 /// Q71UM6 /// Q71UM7	AF070603	<a target="external" href="http://www.wikipathways.org/index.php/Pathway:Homo_sapiens:Calcium_regulation_in_cardiac_cells">Calcium_regulation_in_cardiac_cells</a> /// <a target="external" href="http://www.wikipathways.org/index.php/Pathway:Mus_musculus:Calcium_regulation_in_cardiac_cells">Calcium_regulation_in_cardiac_cells</a> /// <a target="external" href="http://www.wikipathways.org/index.php/…	signal transduction /// signal transduction /// G-protein coupled receptor protein signaling pathway /// acetylcholine receptor signaling, muscarinic pathway /// Ras protein signal transduction	GTPase activity /// GTPase activity /// signal transducer activity	heterotrimeric G-protein complex	Human Genome U133 Plus 2.0 Array	Affymetrix NetAffx website
200751_s_at	HNRNPC	heterogeneous nuclear ribonucleoprotein C (C1/C2)	14q11.2	NM_001077442 /// NM_001077443 /// NM_004500 /// NM_031314	3183	449114	164020	ENSG00000092199	A8K9A4 /// P07910 /// Q569J8	BE898861	<a target="external" href="http://www.wikipathways.org/index.php/Pathway:Homo_sapiens:mRNA_processing_Reactome">mRNA_processing_Reactome</a>	nuclear mRNA splicing, via spliceosome /// mRNA processing /// RNA splicing /// RNA splicing	nucleotide binding /// nucleic acid binding /// RNA binding /// RNA binding /// protein binding /// identical protein binding	nucleus /// spliceosome /// spliceosome /// ribonucleoprotein complex	Human Genome U133 Plus 2.0 Array	Affymetrix NetAffx website
200755_s_at	CALU	calumenin	7q32	NM_001219	813	702061	603420	ENSG00000128595	O43852 /// Q6IAW5	BF939365	---	---	calcium ion binding /// calcium ion binding /// calcium ion binding	extracellular region /// endoplasmic reticulum /// endoplasmic reticulum /// endoplasmic reticulum lumen /// Golgi apparatus /// melanosome	Human Genome U133 Plus 2.0 Array	Affymetrix NetAffx website
200756_x_at	CALU	calumenin	7q32	NM_001219	813	702061	603420	ENSG00000128595	O43852 /// Q6IAW5	U67280	---	---	calcium ion binding /// calcium ion binding /// calcium ion binding	extracellular region /// endoplasmic reticulum /// endoplasmic reticulum /// endoplasmic reticulum lumen /// Golgi apparatus /// melanosome	Human Genome U133 Plus 2.0 Array	Affymetrix NetAffx website
200757_s_at	CALU	calumenin	7q32	NM_001219	813	702061	603420	ENSG00000128595	O43852 /// Q6IAW5	NM_001219	---	---	calcium ion binding /// calcium ion binding /// calcium ion binding	extracellular region /// endoplasmic reticulum /// endoplasmic reticulum /// endoplasmic reticulum lumen /// Golgi apparatus /// melanosome	Human Genome U133 Plus 2.0 Array	Affymetrix NetAffx website
200760_s_at	ARL6IP5	ADP-ribosylation-like factor 6 interacting protein 5	3p14	NM_006407	10550	518060	605709	ENSG00000144746	O75915	N92494	---	L-glutamate transport /// L-glutamate transport	protein binding /// protein binding	cytoplasm /// endoplasmic reticulum /// endoplasmic reticulum membrane /// membrane /// integral to membrane /// integral to membrane	Human Genome U133 Plus 2.0 Array	Affymetrix NetAffx website
200762_at	DPYSL2	dihydropyrimidinase-like 2	8p22-p21	NM_001386	1808	173381	602463	ENSG00000092964	A8K5H2 /// A9CQZ2 /// A9CQZ4 /// Q16555 /// Q53ET2 /// Q59GB4 /// Q8NAN9	NM_001386	---	nucleobase, nucleoside, nucleotide and nucleic acid metabolic process /// signal transduction /// multicellular organismal development /// nervous system development /// nervous system development /// cell differentiation	dihydropyrimidinase activity /// protein binding /// hydrolase activity /// hydrolase activity, acting on carbon-nitrogen (but not peptide) bonds	cytoplasm /// mitochondrion /// axon /// dendrite /// cell soma	Human Genome U133 Plus 2.0 Array	Affymetrix NetAffx website
200764_s_at	CTNNA1	catenin (cadherin-associated protein), alpha 1, 102kDa	5q31	NM_001903	1495	534797	116805	ENSG00000044115	P35221 /// Q8N1C0	AI826881	---	cell adhesion /// cell adhesion /// establishment and/or maintenance of cell polarity /// negative regulation of neuroblast proliferation /// negative regulation of apoptosis /// apical junction assembly /// apical junction assembly /// positive regulation of smoothened signaling pathway	structural molecule activity /// protein binding /// protein binding /// vinculin binding /// cadherin binding /// actin filament binding	cytoplasm /// cytoskeleton /// adherens junction /// zonula adherens /// actin cytoskeleton /// lamellipodium /// cell junction	Human Genome U133 Plus 2.0 Array	Affymetrix NetAffx website
200765_x_at	CTNNA1	catenin (cadherin-associated protein), alpha 1, 102kDa	5q31	NM_001903	1495	534797	116805	ENSG00000044115	P35221 /// Q8N1C0	NM_001903	---	cell adhesion /// cell adhesion /// establishment and/or maintenance of cell polarity /// negative regulation of neuroblast proliferation /// negative regulation of apoptosis /// apical junction assembly /// apical junction assembly /// positive regulation of smoothened signaling pathway	structural molecule activity /// protein binding /// protein binding /// vinculin binding /// cadherin binding /// actin filament binding	cytoplasm /// cytoskeleton /// adherens junction /// zonula adherens /// actin cytoskeleton /// lamellipodium /// cell junction	Human Genome U133 Plus 2.0 Array	Affymetrix NetAffx website
200769_s_at	MAT2A	methionine adenosyltransferase II, alpha	2p11.2	NM_005911	4144	516157	601468	ENSG00000168906	A8K511 /// P31153	NM_005911	---	S-adenosylmethionine biosynthetic process /// one-carbon compound metabolic process /// circadian rhythm /// response to light stimulus /// response to hormone stimulus /// response to drug /// response to cAMP	nucleotide binding /// magnesium ion binding /// methionine adenosyltransferase activity /// methionine adenosyltransferase activity /// ATP binding /// transferase activity /// potassium ion binding /// metal ion binding /// cobalt ion binding	---	Human Genome U133 Plus 2.0 Array	Affymetrix NetAffx website
200771_at	LAMC1	laminin, gamma 1 (formerly LAMB2)	1q31	NM_002293	3915	609663	150290 /// 176780	---	P11047 /// Q6NVY8 /// Q96BH6	NM_002293	<a target="external" href="http://www.wikipathways.org/index.php/Pathway:Homo_sapiens:Inflammatory_Response_Pathway">Inflammatory_Response_Pathway</a>	protein complex assembly /// cell adhesion /// cell adhesion /// endoderm development /// cell migration /// extracellular matrix disassembly /// hemidesmosome assembly /// positive regulation of epithelial cell proliferation	extracellular matrix structural constituent /// protein binding	extracellular region /// proteinaceous extracellular matrix /// basement membrane /// basement membrane /// basement membrane /// basal lamina /// laminin-1 complex /// extracellular matrix /// laminin-10 complex	Human Genome U133 Plus 2.0 Array	Affymetrix NetAffx website
200776_s_at	BZW1 /// BZW1L1	basic leucine zipper and W2 domains 1 /// basic leucine zipper and W2 domains 1 like 1	2q33 /// 3q13.31	NM_014670 /// XM_001721170 /// XM_045290 /// XM_938633	151579 /// 9689	529231	---	ENSG00000082153	Q3LIC9 /// Q53FN7 /// Q7L1Q6	AL518328	---	transcription /// regulation of transcription, DNA-dependent /// regulation of translational initiation	translation initiation factor activity /// binding	cytoplasm	Human Genome U133 Plus 2.0 Array	Affymetrix NetAffx website
200782_at	ANXA5	annexin A5	4q26-q28|4q28-q32	NM_001154	308	480653	131230	ENSG00000164111	A8MTE3 /// P08758 /// Q6FHB3	NM_001154	<a target="external" href="http://www.wikipathways.org/index.php/Pathway:Homo_sapiens:Prostaglandin_synthesis_regulation">Prostaglandin_synthesis_regulation</a>	anti-apoptosis /// signal transduction /// blood coagulation /// negative regulation of coagulation	phospholipase inhibitor activity /// calcium ion binding /// protein binding /// phospholipid binding /// calcium-dependent phospholipid binding	intracellular /// cytoplasm	Human Genome U133 Plus 2.0 Array	Affymetrix NetAffx website
200783_s_at	STMN1	stathmin 1/oncoprotein 18	1p36.1-p35	NM_005563 /// NM_203399 /// NM_203401	3925	707988	151442	ENSG00000117632	A2A2D0 /// A2A2D2 /// P16949 /// Q14CA7 /// Q59G27 /// Q96CE4	NM_005563	---	microtubule depolymerization /// mitotic spindle organization and biogenesis /// signal transduction /// intracellular signaling cascade /// intracellular signaling cascade /// multicellular organismal development /// nervous system development /// cell differentiation	signal transducer activity /// protein binding /// tubulin binding	intracellular /// cytoplasm /// cytoplasm /// cytosol /// microtubule /// membrane /// integral to membrane	Human Genome U133 Plus 2.0 Array	Affymetrix NetAffx website
200785_s_at	LRP1 /// LOC100134190	low density lipoprotein-related protein 1 (alpha-2-macroglobulin receptor) /// similar to low density lipoprotein-related protein 1 (alpha-2-macroglobulin receptor)	12q13-q14	NM_002332 /// XR_037669	100134190 /// 4035	162757	107770	ENSG00000123384	Q07954 /// Q59FG2 /// Q6LAF4 /// Q6LBN5 /// Q6PJ72 /// Q7Z7K9 /// Q86SW0	NM_002332	<a target="external" href="http://www.wikipathways.org/index.php/Pathway:Homo_sapiens:Statin_Pathway_PharmGKB">Statin_Pathway_PharmGKB</a>	lipid metabolic process /// endocytosis /// multicellular organismal development /// cell proliferation	receptor activity /// receptor activity /// lipid transporter activity /// calcium ion binding /// calcium ion binding /// protein binding /// lipoprotein binding /// metal ion binding	membrane fraction /// nucleus /// cytoplasm /// integral to plasma membrane /// coated pit /// membrane /// integral to membrane	Human Genome U133 Plus 2.0 Array	Affymetrix NetAffx website
200788_s_at	PEA15	phosphoprotein enriched in astrocytes 15	1q21.1	NM_003768	8682	517216	603434	ENSG00000162734	B1AKZ3 /// B1AKZ4 /// Q14801 /// Q15121 /// Q6FHL9 /// Q96FS5	NM_003768	<a target="external" href="http://www.wikipathways.org/index.php/Pathway:Homo_sapiens:Calcium_regulation_in_cardiac_cells">Calcium_regulation_in_cardiac_cells</a>	transport /// transport /// apoptosis /// anti-apoptosis /// carbohydrate transport /// regulation of apoptosis /// regulation of apoptosis /// negative regulation of glucose import	sugar:hydrogen symporter activity /// protein binding /// protein binding	cytoplasm /// microtubule associated complex	Human Genome U133 Plus 2.0 Array	Affymetrix NetAffx website
200790_at	ODC1	ornithine decarboxylase 1	2p25	NM_002539	4953	467701	114500 /// 165640	ENSG00000115758	P11926 /// Q2F835 /// Q53TU3	NM_002539	---	kidney development /// polyamine biosynthetic process /// polyamine biosynthetic process /// positive regulation of cell proliferation	catalytic activity /// ornithine decarboxylase activity /// ornithine decarboxylase activity /// protein binding /// lyase activity /// carboxy-lyase activity	cytosol	Human Genome U133 Plus 2.0 Array	Affymetrix NetAffx website
200795_at	SPARCL1	SPARC-like 1 (mast9, hevin)	4q22.1	NM_004684	8404	62886	606041	ENSG00000152583	Q14515 /// Q8N4S1	NM_004684	---	---	calcium ion binding	extracellular region /// proteinaceous extracellular matrix /// synapse	Human Genome U133 Plus 2.0 Array	Affymetrix NetAffx website
200796_s_at	MCL1	myeloid cell leukemia sequence 1 (BCL2-related)	1q21	NM_021960 /// NM_182763	4170	632486	159552	ENSG00000143384	Q07820	BF594446	<a target="external" href="http://www.wikipathways.org/index.php/Pathway:Homo_sapiens:Apoptosis_GenMAPP">Apoptosis_GenMAPP</a> /// <a target="external" href="http://www.wikipathways.org/index.php/Pathway:Homo_sapiens:Apoptosis_KEGG">Apoptosis_KEGG</a>	cell fate determination /// apoptosis /// apoptosis /// anti-apoptosis /// multicellular organismal development /// multicellular organismal development /// apoptotic program /// cellular homeostasis /// cell differentiation /// regulation of apoptosis	protein binding /// protein binding /// protein binding /// protein channel activity /// protein heterodimerization activity	nucleus /// cytoplasm /// cytoplasm /// mitochondrion /// mitochondrial outer membrane /// membrane /// integral to membrane	Human Genome U133 Plus 2.0 Array	Affymetrix NetAffx website
200798_x_at	MCL1	myeloid cell leukemia sequence 1 (BCL2-related)	1q21	NM_021960 /// NM_182763	4170	632486	159552	ENSG00000143384	Q07820	NM_021960	<a target="external" href="http://www.wikipathways.org/index.php/Pathway:Homo_sapiens:Apoptosis_GenMAPP">Apoptosis_GenMAPP</a> /// <a target="external" href="http://www.wikipathways.org/index.php/Pathway:Homo_sapiens:Apoptosis_KEGG">Apoptosis_KEGG</a>	cell fate determination /// apoptosis /// apoptosis /// anti-apoptosis /// multicellular organismal development /// multicellular organismal development /// apoptotic program /// cellular homeostasis /// cell differentiation /// regulation of apoptosis	protein binding /// protein binding /// protein binding /// protein channel activity /// protein heterodimerization activity	nucleus /// cytoplasm /// cytoplasm /// mitochondrion /// mitochondrial outer membrane /// membrane /// integral to membrane	Human Genome U133 Plus 2.0 Array	Affymetrix NetAffx website
200799_at	HSPA1A /// HSPA1B	heat shock 70kDa protein 1A /// heat shock 70kDa protein 1B	6p21.3	NM_005345 /// NM_005346	3303 /// 3304	520028	140550 /// 603012	ENSG00000204389 /// ENSG00000215292 /// ENSG00000215328	A8K5I0 /// P08107 /// Q59EJ3 /// Q5SP16 /// Q9UQC1	NM_005345	---	mRNA catabolic process /// anti-apoptosis /// response to stress /// response to unfolded protein	nucleotide binding /// protein binding /// ATP binding /// unfolded protein binding	nucleus /// cytoplasm /// mitochondrion /// endoplasmic reticulum	Human Genome U133 Plus 2.0 Array	Affymetrix NetAffx website
200800_s_at	HSPA1A /// HSPA1B	heat shock 70kDa protein 1A /// heat shock 70kDa protein 1B	6p21.3	NM_005345 /// NM_005346	3303 /// 3304	520028	140550 /// 603012	ENSG00000204388 /// ENSG00000204389 /// ENSG00000212860 /// ENSG00000212866 /// ENSG00000215292 /// ENSG00000215328	A8K5I0 /// P08107 /// Q59EJ3 /// Q5SP16 /// Q9UQC1	NM_005345	---	mRNA catabolic process /// anti-apoptosis /// response to stress /// response to unfolded protein	nucleotide binding /// protein binding /// ATP binding /// unfolded protein binding	nucleus /// cytoplasm /// mitochondrion /// endoplasmic reticulum	Human Genome U133 Plus 2.0 Array	Affymetrix NetAffx website
200806_s_at	HSPD1	heat shock 60kDa protein 1 (chaperonin)	2q33.1	NM_002156 /// NM_199440	3329	632539	118190 /// 605280	ENSG00000144381	P10809 /// Q53QD5 /// Q53SE2 /// Q96RI3 /// Q96RI4 /// Q9UCR6	BE256479	---	protein folding /// protein folding /// response to stress /// response to unfolded protein /// protein import into mitochondrial matrix /// regulation of apoptosis /// cellular protein metabolic process	nucleotide binding /// protein binding /// ATP binding /// ATP binding /// unfolded protein binding /// unfolded protein binding /// chaperone binding	cytoplasm /// mitochondrion /// mitochondrion /// mitochondrial inner membrane /// mitochondrial matrix /// cyclin-dependent protein kinase activating kinase holoenzyme complex	Human Genome U133 Plus 2.0 Array	Affymetrix NetAffx website
200808_s_at	ZYX	zyxin	7q32	NM_001010972 /// NM_003461	7791	490415	602002	ENSG00000159840	A4D2G6 /// Q15942 /// Q28617 /// Q96AF9 /// Q9BUS0	NM_003461	<a target="external" href="http://www.wikipathways.org/index.php/Pathway:Homo_sapiens:Integrin-mediated_cell_adhesion_KEGG">Integrin-mediated_cell_adhesion_KEGG</a>	cell adhesion /// cell adhesion /// signal transduction /// cell-cell signaling	protein binding /// protein binding /// zinc ion binding /// metal ion binding	stress fiber /// cytoplasm /// cytoskeleton /// plasma membrane /// integral to plasma membrane /// cell-cell adherens junction /// focal adhesion	Human Genome U133 Plus 2.0 Array	Affymetrix NetAffx website
200821_at	LAMP2	lysosomal-associated membrane protein 2	Xq24	NM_001122606 /// NM_002294 /// NM_013995	3920	496684	300257 /// 309060	ENSG00000005893	A8K4X5 /// P13473 /// Q6Q3G8 /// Q9UD93	NM_013995	---	glycogen metabolic process	---	membrane fraction /// lysosome /// lysosome /// lysosomal membrane /// lysosomal membrane /// endosome /// late endosome /// plasma membrane /// endosome membrane /// membrane /// integral to membrane /// platelet dense granule membrane	Human Genome U133 Plus 2.0 Array	Affymetrix NetAffx website
200831_s_at	SCD	stearoyl-CoA desaturase (delta-9-desaturase)	10q23-q24	NM_005063	6319	558396	604031	ENSG00000099194	O00767 /// Q59GX7 /// Q5QTQ8 /// Q9P1L1	AA678241	<a target="external" href="http://www.wikipathways.org/index.php/Pathway:Homo_sapiens:Fatty_Acid_Synthesis">Fatty_Acid_Synthesis</a>	lipid metabolic process /// fatty acid biosynthetic process /// lipid biosynthetic process	stearoyl-CoA 9-desaturase activity /// stearoyl-CoA 9-desaturase activity /// iron ion binding /// oxidoreductase activity /// oxidoreductase activity, acting on paired donors, with oxidation of a pair of donors resulting in the reduction of molecular oxygen to two molecules of water	endoplasmic reticulum /// endoplasmic reticulum membrane /// membrane /// integral to membrane	Human Genome U133 Plus 2.0 Array	Affymetrix NetAffx website
200832_s_at	SCD	stearoyl-CoA desaturase (delta-9-desaturase)	10q23-q24	NM_005063	6319	558396	604031	ENSG00000099194	O00767 /// Q59GX7 /// Q5QTQ8 /// Q9P1L1	AB032261	<a target="external" href="http://www.wikipathways.org/index.php/Pathway:Homo_sapiens:Fatty_Acid_Synthesis">Fatty_Acid_Synthesis</a>	lipid metabolic process /// fatty acid biosynthetic process /// lipid biosynthetic process	stearoyl-CoA 9-desaturase activity /// stearoyl-CoA 9-desaturase activity /// iron ion binding /// oxidoreductase activity /// oxidoreductase activity, acting on paired donors, with oxidation of a pair of donors resulting in the reduction of molecular oxygen to two molecules of water	endoplasmic reticulum /// endoplasmic reticulum membrane /// membrane /// integral to membrane	Human Genome U133 Plus 2.0 Array	Affymetrix NetAffx website
200838_at	CTSB	cathepsin B	8p22	NM_001908 /// NM_147780 /// NM_147781 /// NM_147782 /// NM_147783	1508	520898	116810	---	A8K2H4 /// P07858 /// Q5HYG5 /// Q6LAF9	NM_001908	---	proteolysis /// proteolysis /// response to wounding /// regulation of apoptosis /// regulation of catalytic activity	cysteine-type endopeptidase activity /// cathepsin B activity /// cathepsin B activity /// protein binding /// peptidase activity /// cysteine-type peptidase activity /// hydrolase activity /// kininogen binding	extracellular region /// intracellular /// mitochondrion /// lysosome /// external side of plasma membrane /// apical plasma membrane /// melanosome	Human Genome U133 Plus 2.0 Array	Affymetrix NetAffx website
200840_at	KARS	lysyl-tRNA synthetase	16q23-q24	NM_005548	3735	3100	601421	ENSG00000065427	A8MSK1 /// Q15046 /// Q6ZTI3 /// Q9HB23	NM_005548	---	translation /// tRNA aminoacylation for protein translation /// lysyl-tRNA aminoacylation /// lysyl-tRNA aminoacylation /// tRNA processing	tRNA binding /// nucleotide binding /// magnesium ion binding /// nucleic acid binding /// aminoacyl-tRNA ligase activity /// lysine-tRNA ligase activity /// lysine-tRNA ligase activity /// lysine-tRNA ligase activity /// ATP binding /// ligase activity /// metal ion binding	soluble fraction /// cytoplasm /// cytoplasm /// mitochondrion	Human Genome U133 Plus 2.0 Array	Affymetrix NetAffx website
200841_s_at	EPRS	glutamyl-prolyl-tRNA synthetase	1q41-q42	NM_004446	2058	497788	138295	ENSG00000136628	P07814 /// Q3KQZ8	AI142677	---	translation /// tRNA aminoacylation for protein translation /// glutamyl-tRNA aminoacylation /// prolyl-tRNA aminoacylation /// protein complex assembly	nucleotide binding /// catalytic activity /// aminoacyl-tRNA ligase activity /// glutamate-tRNA ligase activity /// proline-tRNA ligase activity /// protein binding /// ATP binding /// ligase activity	soluble fraction /// cytoplasm /// cytoplasm	Human Genome U133 Plus 2.0 Array	Affymetrix NetAffx website
200842_s_at	EPRS	glutamyl-prolyl-tRNA synthetase	1q41-q42	NM_004446	2058	497788	138295	ENSG00000136628	P07814 /// Q3KQZ8	AI475965	---	translation /// tRNA aminoacylation for protein translation /// glutamyl-tRNA aminoacylation /// prolyl-tRNA aminoacylation /// protein complex assembly	nucleotide binding /// catalytic activity /// aminoacyl-tRNA ligase activity /// glutamate-tRNA ligase activity /// proline-tRNA ligase activity /// protein binding /// ATP binding /// ligase activity	soluble fraction /// cytoplasm /// cytoplasm	Human Genome U133 Plus 2.0 Array	Affymetrix NetAffx website
200848_at	AHCYL1	S-adenosylhomocysteine hydrolase-like 1	1p13.2	NM_006621	10768	705418	607826	ENSG00000168710	A8MYU1 /// O43210 /// O43865 /// Q2NKW8 /// Q6ZMM9 /// Q9BTL0	AA479488	---	one-carbon compound metabolic process /// metabolic process	catalytic activity /// adenosylhomocysteinase activity /// binding /// hydrolase activity	endoplasmic reticulum	Human Genome U133 Plus 2.0 Array	Affymetrix NetAffx website
200850_s_at	AHCYL1	S-adenosylhomocysteine hydrolase-like 1	1p13.2	NM_006621	10768	705418	607826	ENSG00000168710	A8MYU1 /// O43210 /// O43865 /// Q2NKW8 /// Q6ZMM9 /// Q9BTL0	NM_006621	---	one-carbon compound metabolic process /// metabolic process	catalytic activity /// adenosylhomocysteinase activity /// binding /// hydrolase activity	endoplasmic reticulum	Human Genome U133 Plus 2.0 Array	Affymetrix NetAffx website
200852_x_at	GNB2	guanine nucleotide binding protein (G protein), beta polypeptide 2	7q21.3-q22.1|7q22	NM_005273	2783	185172	139390	ENSG00000172354	P62879 /// Q6FHM2	NM_005273	<a target="external" href="http://www.wikipathways.org/index.php/Pathway:Homo_sapiens:Calcium_regulation_in_cardiac_cells">Calcium_regulation_in_cardiac_cells</a> /// <a target="external" href="http://www.wikipathways.org/index.php/Pathway:Mus_musculus:Calcium_regulation_in_cardiac_cells">Calcium_regulation_in_cardiac_cells</a> /// <a target="external" href="http://www.wikipathways.org/index.php/…	signal transduction /// G-protein coupled receptor protein signaling pathway	GTPase activity /// signal transducer activity /// calcium channel regulator activity	---	Human Genome U133 Plus 2.0 Array	Affymetrix NetAffx website
200859_x_at	FLNA	filamin A, alpha (actin binding protein 280)	Xq28	NM_001110556 /// NM_001456	2316	195464	300017 /// 300049 /// 300537 /// 304120 /// 309350 /// 311300	ENSG00000196924	A6NDY9 /// P21333 /// Q2VP91 /// Q5HY53 /// Q5HY54 /// Q5HY55 /// Q5HY89 /// Q5HY90 /// Q60FE5 /// Q60FE6 /// Q6NXF2 /// Q86TQ3 /// Q8NF52 /// Q8TES4 /// Q96C61	NM_001456	---	cell motility /// cell surface receptor linked signal transduction /// nervous system development /// actin cytoskeleton organization and biogenesis /// positive regulation of transcription factor import into nucleus /// positive regulation of I-kappaB kinase/NF-kappaB cascade /// positive regulation of I-kappaB kinase/NF-kappaB cascade /// negative regulation of transcription factor activity	actin binding /// signal transducer activity /// signal transducer activity /// protein binding /// transcription factor binding /// actin filament binding	nucleus /// cytoplasm /// cytoplasm /// cytoskeleton /// actin cytoskeleton	Human Genome U133 Plus 2.0 Array	Affymetrix NetAffx website
200862_at	DHCR24	24-dehydrocholesterol reductase	1p33-p31.1	NM_014762	1718	498727	602398 /// 606418	ENSG00000116133	Q15392 /// Q3LIE7	NM_014762	---	steroid biosynthetic process /// cholesterol biosynthetic process /// cholesterol biosynthetic process /// cholesterol biosynthetic process /// cholesterol biosynthetic process /// apoptosis /// anti-apoptosis /// response to oxidative stress /// cell cycle arrest /// protein localization /// lipid biosynthetic process /// tissue development /// tissue development /// membrane organization and bi…	catalytic activity /// oxidoreductase activity /// oxidoreductase activity, acting on the CH-CH group of donors, NAD or NADP as acceptor /// enzyme binding /// peptide antigen binding /// FAD binding	Golgi membrane /// nucleus /// endoplasmic reticulum /// endoplasmic reticulum /// endoplasmic reticulum membrane /// endoplasmic reticulum membrane /// Golgi apparatus /// membrane /// integral to membrane	Human Genome U133 Plus 2.0 Array	Affymetrix NetAffx website
200864_s_at	RAB11A	RAB11A, member RAS oncogene family	15q21.3-q22.31	NM_004663	8766	321541	605570	ENSG00000103769	P62491	NM_004663	---	transport /// small GTPase mediated signal transduction /// protein transport /// plasma membrane to endosome transport	nucleotide binding /// GTPase activity /// transporter activity /// protein binding /// protein binding /// GTP binding /// syntaxin binding	endosome /// trans-Golgi network /// plasma membrane /// membrane /// recycling endosome membrane	Human Genome U133 Plus 2.0 Array	Affymetrix NetAffx website
200866_s_at	PSAP	prosaposin (variant Gaucher disease and variant metachromatic leukodystrophy)	10q21-q22	NM_001042465 /// NM_001042466 /// NM_002778	5660	523004	176801 /// 249900 /// 610539 /// 611721 /// 611722	ENSG00000197746	P07602 /// Q53FJ5 /// Q53Y86 /// Q59EN5 /// Q5BJH1	M32221	---	lipid metabolic process /// sphingolipid metabolic process /// glycosphingolipid metabolic process /// lipid transport /// lysosome organization and biogenesis	cerebroside-sulfatase activity /// galactosylceramidase activity /// glucosylceramidase activity /// alpha-galactosidase activity /// beta-galactosidase activity /// sphingomyelin phosphodiesterase activity /// enzyme activator activity /// lipid binding	extracellular space /// lysosome /// integral to membrane	Human Genome U133 Plus 2.0 Array	Affymetrix NetAffx website
200868_s_at	ZNF313	zinc finger protein 313	20q13.13	NM_018683	55905	144949	---	ENSG00000124226	Q9Y508	NM_018683	---	multicellular organismal development /// spermatogenesis /// cell differentiation	protein binding /// zinc ion binding /// metal ion binding	intracellular /// intracellular	Human Genome U133 Plus 2.0 Array	Affymetrix NetAffx website
200871_s_at	PSAP	prosaposin (variant Gaucher disease and variant metachromatic leukodystrophy)	10q21-q22	NM_001042465 /// NM_001042466 /// NM_002778	5660	523004	176801 /// 249900 /// 610539 /// 611721 /// 611722	ENSG00000197746	P07602 /// Q53FJ5 /// Q53Y86 /// Q59EN5 /// Q5BJH1	NM_002778	---	lipid metabolic process /// sphingolipid metabolic process /// glycosphingolipid metabolic process /// lipid transport /// lysosome organization and biogenesis	cerebroside-sulfatase activity /// galactosylceramidase activity /// glucosylceramidase activity /// alpha-galactosidase activity /// beta-galactosidase activity /// sphingomyelin phosphodiesterase activity /// enzyme activator activity /// lipid binding	extracellular space /// lysosome /// integral to membrane	Human Genome U133 Plus 2.0 Array	Affymetrix NetAffx website
200879_s_at	EPAS1	endothelial PAS domain protein 1	2p21-p16	NM_001430	2034	468410	603349 /// 611783	ENSG00000116016	Q53SM6 /// Q96KZ1 /// Q99814	NM_001430	---	angiogenesis /// response to hypoxia /// transcription /// regulation of transcription, DNA-dependent /// transcription from RNA polymerase II promoter /// signal transduction /// signal transduction /// multicellular organismal development /// cell differentiation /// regulation of transcription /// positive regulation of transcription from RNA polymerase II promoter	DNA binding /// DNA binding /// transcription factor activity /// RNA polymerase II transcription factor activity, enhancer binding /// transcription coactivator activity /// signal transducer activity /// protein binding /// transcription regulator activity /// histone acetyltransferase binding	nucleus /// transcription factor complex /// transcription factor complex	Human Genome U133 Plus 2.0 Array	Affymetrix NetAffx website
200884_at	CKB	creatine kinase, brain	14q32	NM_001823	1152	173724	123280	---	A8K236 /// P12277 /// Q6FG40	NM_001823	---	brain development /// cellular chloride ion homeostasis	nucleotide binding /// catalytic activity /// creatine kinase activity /// creatine kinase activity /// protein binding /// ATP binding /// kinase activity /// transferase activity /// transferase activity, transferring phosphorus-containing groups	cytoplasm /// cytoplasm /// mitochondrion	Human Genome U133 Plus 2.0 Array	Affymetrix NetAffx website
200889_s_at	SSR1	signal sequence receptor, alpha (translocon-associated protein alpha)	6p24.3	NM_003144	6745	699196	600868	ENSG00000124783	A8K685 /// P43307 /// Q8TC20	AI016620	---	cotranslational protein targeting to membrane /// positive regulation of cell proliferation	receptor activity /// signal sequence binding /// calcium ion binding	endoplasmic reticulum /// endoplasmic reticulum /// endoplasmic reticulum membrane /// membrane /// integral to membrane /// integral to membrane	Human Genome U133 Plus 2.0 Array	Affymetrix NetAffx website
200890_s_at	SSR1	signal sequence receptor, alpha (translocon-associated protein alpha)	6p24.3	NM_003144	6745	699196	600868	ENSG00000124783	A8K685 /// P43307 /// Q8TC20	AW006345	---	cotranslational protein targeting to membrane /// positive regulation of cell proliferation	receptor activity /// signal sequence binding /// calcium ion binding	endoplasmic reticulum /// endoplasmic reticulum /// endoplasmic reticulum membrane /// membrane /// integral to membrane /// integral to membrane	Human Genome U133 Plus 2.0 Array	Affymetrix NetAffx website
200899_s_at	MGEA5	meningioma expressed antigen 5 (hyaluronidase)	10q24.1-q24.3	NM_012215	10724	500842	604039	ENSG00000198408	O60502	NM_012215	---	glycoprotein catabolic process /// metabolic process	catalytic activity /// histone acetyltransferase activity /// hyalurononglucosaminidase activity /// beta-N-acetylhexosaminidase activity /// acyltransferase activity /// transferase activity /// hydrolase activity /// hydrolase activity, acting on glycosyl bonds	nucleus /// cytoplasm	Human Genome U133 Plus 2.0 Array	Affymetrix NetAffx website
200904_at	HLA-E	major histocompatibility complex, class I, E	6p21.3	NM_005516	3133	650174	143010	ENSG00000204592 /// ENSG00000206413 /// ENSG00000206493	A8K8M6 /// O19682 /// O19683 /// O19744 /// P13747 /// Q29896 /// Q29939 /// Q2L6I5 /// Q30168 /// Q30171 /// Q59EE1 /// Q6DU44 /// Q6DU50 /// Q6KBZ5 /// Q7Z367 /// Q9MW44 /// Q9TNU7 /// Q9TNU8	X56841	<a target="external" href="http://www.wikipathways.org/index.php/Pathway:Homo_sapiens:Proteasome_Degradation">Proteasome_Degradation</a>	antigen processing and presentation of peptide antigen via MHC class I /// immune response /// antigen processing and presentation	MHC class I receptor activity	membrane /// integral to membrane /// MHC class I protein complex	Human Genome U133 Plus 2.0 Array	Affymetrix NetAffx website
200906_s_at	PALLD	palladin, cytoskeletal associated protein	4q32.3	NM_016081	23022	151220	260350 /// 606856 /// 608092	ENSG00000129116	Q4W5A6 /// Q7L8P5 /// Q8WX93	AK025843	---	cytoskeleton organization and biogenesis /// flagellum biogenesis	motor activity /// actin binding /// protein binding /// muscle alpha-actinin binding	nucleus /// cytoplasm /// cytoskeleton /// actin filament /// flagellin-based flagellum hook	Human Genome U133 Plus 2.0 Array	Affymetrix NetAffx website
200907_s_at	PALLD	palladin, cytoskeletal associated protein	4q32.3	NM_016081	23022	151220	260350 /// 606856 /// 608092	ENSG00000129116	Q4W5A6 /// Q7L8P5 /// Q8WX93	AU157932	---	cytoskeleton organization and biogenesis /// flagellum biogenesis	motor activity /// actin binding /// protein binding /// muscle alpha-actinin binding	nucleus /// cytoplasm /// cytoskeleton /// actin filament /// flagellin-based flagellum hook	Human Genome U133 Plus 2.0 Array	Affymetrix NetAffx website
200908_s_at	RPLP2	ribosomal protein, large, P2	11p15.5-p15.4	NM_001004	6181	437594	180530	---	P05387 /// Q6FG96	BC005354	<a target="external" href="http://www.wikipathways.org/index.php/Pathway:Homo_sapiens:Ribosomal_Proteins">Ribosomal_Proteins</a>	translation /// translational elongation	RNA binding /// structural constituent of ribosome /// structural constituent of ribosome	intracellular /// ribosome /// cytosolic large ribosomal subunit /// ribonucleoprotein complex	Human Genome U133 Plus 2.0 Array	Affymetrix NetAffx website
200917_s_at	SRPR	signal recognition particle receptor ('docking protein')	11q24.3	NM_003139	6734	591936	182180	ENSG00000182934	P08240 /// Q6IAX9	BG474541	---	cotranslational protein targeting to membrane /// SRP-dependent cotranslational protein targeting to membrane /// intracellular protein transport	nucleotide binding /// GTPase activity /// receptor activity /// signal recognition particle binding /// signal recognition particle binding /// GTP binding /// 7S RNA binding /// nucleoside-triphosphatase activity	endoplasmic reticulum /// endoplasmic reticulum /// signal recognition particle receptor complex /// signal recognition particle receptor complex /// signal recognition particle, endoplasmic reticulum targeting /// endoplasmic reticulum membrane /// membrane /// integral to membrane /// ribonucleoprotein complex /// signal recognition particle	Human Genome U133 Plus 2.0 Array	Affymetrix NetAffx website
200920_s_at	BTG1	B-cell translocation gene 1, anti-proliferative	12q22	NM_001731	694	255935	109580	ENSG00000133639	P62324 /// Q6IBC8	AL535380	<a target="external" href="http://www.wikipathways.org/index.php/Pathway:Homo_sapiens:Circadian_Exercise">Circadian_Exercise</a> /// <a target="external" href="http://www.wikipathways.org/index.php/Pathway:Mus_musculus:Circadian_Exercise">Circadian_Exercise</a>	protein amino acid methylation /// negative regulation of cell proliferation /// cell migration /// negative regulation of cell growth /// regulation of apoptosis /// regulation of transcription /// positive regulation of endothelial cell differentiation /// positive regulation of myoblast differentiation /// positive regulation of angiogenesis	transcription cofactor activity /// protein binding /// enzyme binding /// kinase binding	nucleus /// nucleus /// cytoplasm	Human Genome U133 Plus 2.0 Array	Affymetrix NetAffx website
200927_s_at	RAB14	RAB14, member RAS oncogene family	9q32-q34.11	NM_016322	51552	371563	---	ENSG00000119396	P61106	AA919115	---	transport /// Golgi to endosome transport /// small GTPase mediated signal transduction /// small GTPase mediated signal transduction /// neurotransmitter secretion /// protein transport /// vesicle-mediated transport /// intracellular transport	nucleotide binding /// GTPase activity /// protein binding /// GTP binding	intracellular /// membrane fraction /// membrane fraction /// lysosome /// lysosome /// early endosome /// early endosome /// late endosome /// late endosome /// rough endoplasmic reticulum /// rough endoplasmic reticulum /// Golgi stack /// Golgi stack /// cytosol /// cytosol /// plasma membrane /// plasma membrane /// membrane /// trans-Golgi network transport vesicle /// trans-Golgi network tr…	Human Genome U133 Plus 2.0 Array	Affymetrix NetAffx website
200935_at	CALR	calreticulin	19p13.3-p13.2	NM_004343	811	515162	109091	ENSG00000179218	P27797 /// Q53G71 /// Q6IAT4	NM_004343	<a target="external" href="http://www.wikipathways.org/index.php/Pathway:Homo_sapiens:Calcium_regulation_in_cardiac_cells">Calcium_regulation_in_cardiac_cells</a> /// <a target="external" href="http://www.wikipathways.org/index.php/Pathway:Homo_sapiens:GPCRDB_Class_B_Secretin-like">GPCRDB_Class_B_Secretin-like</a>	regulation of transcription, DNA-dependent /// protein folding /// protein export from nucleus /// cellular calcium ion homeostasis /// cortical actin cytoskeleton organization and biogenesis /// regulation of meiosis /// regulation of apoptosis	DNA binding /// calcium ion binding /// calcium ion binding /// protein binding /// sugar binding /// zinc ion binding /// metal ion binding /// unfolded protein binding	extracellular region /// proteinaceous extracellular matrix /// extracellular space /// cytoplasm /// endoplasmic reticulum /// endoplasmic reticulum /// endoplasmic reticulum lumen /// endoplasmic reticulum lumen /// cytosol /// external side of plasma membrane /// cell surface	Human Genome U133 Plus 2.0 Array	Affymetrix NetAffx website
200943_at	HMGN1	high-mobility group nucleosome binding domain 1	21q22.3|21q22.2	NM_004965	3150	356285	163920	ENSG00000184409 /// ENSG00000198875 /// ENSG00000205581	A6NEL0 /// A6NGZ2 /// A6NL93 /// A8MWU5 /// P05114 /// Q3B790 /// Q59G64 /// Q6NSG7 /// Q96N32	NM_004965	---	---	DNA binding /// DNA binding /// RNA polymerase II transcription factor activity /// positive transcription elongation factor activity	chromatin /// chromatin /// nucleus /// nucleus	Human Genome U133 Plus 2.0 Array	Affymetrix NetAffx website
200950_at	ARPC1A	actin related protein 2/3 complex, subunit 1A, 41kDa	7q22.1	NM_006409	10552	124126	604220	ENSG00000013455	A4D276 /// Q53GB6 /// Q59GQ0 /// Q75MY0 /// Q92747	NM_006409	---	actin cytoskeleton organization and biogenesis	actin binding /// actin binding /// protein binding	cytoplasm /// cytoskeleton /// actin cytoskeleton /// cell projection	Human Genome U133 Plus 2.0 Array	Affymetrix NetAffx website
200951_s_at	CCND2	cyclin D2	12p13	NM_001759	894	376071	123833	ENSG00000118971	A8K531 /// P30279 /// Q53ER2	AW026491	<a target="external" href="http://www.wikipathways.org/index.php/Pathway:Homo_sapiens:Cell_cycle_KEGG">Cell_cycle_KEGG</a> /// <a target="external" href="http://www.wikipathways.org/index.php/Pathway:Homo_sapiens:G1_to_S_cell_cycle_Reactome">G1_to_S_cell_cycle_Reactome</a> /// <a target="external" href="http://www.wikipathways.org/index.php/Pathway:Homo_sapiens:Ovarian_Infertility_Genes">Ovarian_…	positive regulation of protein amino acid phosphorylation /// cell cycle /// positive regulation of cell proliferation /// positive regulation of cyclin-dependent protein kinase activity /// cell division	protein binding /// protein binding /// protein kinase binding /// protein kinase binding	cyclin-dependent protein kinase holoenzyme complex /// nucleus	Human Genome U133 Plus 2.0 Array	Affymetrix NetAffx website
200953_s_at	CCND2	cyclin D2	12p13	NM_001759	894	376071	123833	ENSG00000118971	A8K531 /// P30279 /// Q53ER2	NM_001759	<a target="external" href="http://www.wikipathways.org/index.php/Pathway:Homo_sapiens:Cell_cycle_KEGG">Cell_cycle_KEGG</a> /// <a target="external" href="http://www.wikipathways.org/index.php/Pathway:Homo_sapiens:G1_to_S_cell_cycle_Reactome">G1_to_S_cell_cycle_Reactome</a> /// <a target="external" href="http://www.wikipathways.org/index.php/Pathway:Homo_sapiens:Ovarian_Infertility_Genes">Ovarian_…	positive regulation of protein amino acid phosphorylation /// cell cycle /// positive regulation of cell proliferation /// positive regulation of cyclin-dependent protein kinase activity /// cell division	protein binding /// protein binding /// protein kinase binding /// protein kinase binding	cyclin-dependent protein kinase holoenzyme complex /// nucleus	Human Genome U133 Plus 2.0 Array	Affymetrix NetAffx website
200961_at	SEPHS2	selenophosphate synthetase 2	16p11.2	NM_012248	22928	118725	606218	ENSG00000179918	P53680 /// Q8N9T3 /// Q8NAW0 /// Q99611	NM_012248	---	protein complex assembly /// transport /// intracellular protein transport /// vesicle-mediated transport /// selenocysteine biosynthetic process /// regulation of endocytosis /// clathrin coat assembly	nucleotide binding /// catalytic activity /// selenide, water dikinase activity /// selenide, water dikinase activity /// transporter activity /// protein binding /// ATP binding /// selenium binding /// protein transporter activity /// kinase activity /// transferase activity	plasma membrane /// coated pit /// membrane /// membrane coat /// AP-2 adaptor complex	Human Genome U133 Plus 2.0 Array	Affymetrix NetAffx website
200962_at	RPL31	ribosomal protein L31	2q11.2	NM_000993 /// NM_001098577 /// NM_001099693	6160	469473	---	---	P62899 /// Q6IRZ0	AI348010	<a target="external" href="http://www.wikipathways.org/index.php/Pathway:Homo_sapiens:Ribosomal_Proteins">Ribosomal_Proteins</a> /// <a target="external" href="http://www.wikipathways.org/index.php/Pathway:Mus_musculus:Ribosomal_Proteins">Ribosomal_Proteins</a> /// <a target="external" href="http://www.wikipathways.org/index.php/Pathway:Rattus_norvegicus:Ribosomal_Proteins">Ribosomal_Proteins</a>	translation /// translation	RNA binding /// structural constituent of ribosome /// structural constituent of ribosome /// protein binding	intracellular /// ribosome /// cytosolic large ribosomal subunit /// ribonucleoprotein complex	Human Genome U133 Plus 2.0 Array	Affymetrix NetAffx website
200972_at	TSPAN3	tetraspanin 3	15q24.3	NM_005724 /// NM_198902	10099	5062	---	ENSG00000140391	A6NEH4 /// O60637	BC000704	---	cell motility /// cell proliferation	---	membrane /// integral to membrane /// integral to membrane	Human Genome U133 Plus 2.0 Array	Affymetrix NetAffx website
200973_s_at	TSPAN3	tetraspanin 3	15q24.3	NM_005724 /// NM_198902	10099	5062	---	ENSG00000140391	A6NEH4 /// O60637	NM_005724	---	cell motility /// cell proliferation	---	membrane /// integral to membrane /// integral to membrane	Human Genome U133 Plus 2.0 Array	Affymetrix NetAffx website
200974_at	ACTA2	actin, alpha 2, smooth muscle, aorta	10q23.3	NM_001613	59	500483	102620	ENSG00000107796	P62736 /// Q13707 /// Q562S2 /// Q5T9N7 /// Q6ZSQ4	NM_001613	<a target="external" href="http://www.wikipathways.org/index.php/Pathway:Homo_sapiens:Smooth_muscle_contraction">Smooth_muscle_contraction</a> /// <a target="external" href="http://www.wikipathways.org/index.php/Pathway:Mus_musculus:Smooth_muscle_contraction">Smooth_muscle_contraction</a> /// <a target="external" href="http://www.wikipathways.org/index.php/Pathway:Rattus_norvegicus:Smooth_muscle_…	---	nucleotide binding /// structural molecule activity /// protein binding /// ATP binding	cytoplasm /// cytoskeleton	Human Genome U133 Plus 2.0 Array	Affymetrix NetAffx website
200975_at	PPT1	palmitoyl-protein thioesterase 1 (ceroid-lipofuscinosis, neuronal 1, infantile)	1p32	NM_000310	5538	3873	256730 /// 600722	ENSG00000131238	P50897 /// Q5T0S0 /// Q5T0S4 /// Q5T0S6 /// Q6FGQ4	NM_000310	---	protein depalmitoylation /// protein depalmitoylation /// DNA fragmentation during apoptosis /// protein modification process /// receptor-mediated endocytosis /// pinocytosis /// lysosomal lumen acidification /// nervous system development /// brain development /// brain development /// visual perception /// protein transport /// lipid catabolic process /// sphingolipid catabolic process /// pro…	palmitoyl-(protein) hydrolase activity /// palmitoyl-(protein) hydrolase activity /// palmitoyl-(protein) hydrolase activity /// palmitoyl-(protein) hydrolase activity /// palmitoyl-CoA hydrolase activity /// palmitoyl-CoA hydrolase activity /// hydrolase activity	extracellular region /// extracellular region /// membrane fraction /// nucleus /// lysosome /// lysosome /// lysosome /// Golgi apparatus /// cytosol /// synaptic vesicle /// axon /// membrane raft	Human Genome U133 Plus 2.0 Array	Affymetrix NetAffx website
200979_at	PDHA1	pyruvate dehydrogenase (lipoamide) alpha 1	Xp22.2-p22.1	NM_000284	5160	530331	300502 /// 308930 /// 312170	---	A5YPB6 /// A5YVE9 /// P08559 /// Q15994 /// Q53GE3 /// Q53H41	BF739979	<a target="external" href="http://www.wikipathways.org/index.php/Pathway:Homo_sapiens:Acetylcholine_Synthesis">Acetylcholine_Synthesis</a> /// <a target="external" href="http://www.wikipathways.org/index.php/Pathway:Homo_sapiens:Glycolysis_and_Gluconeogenesis">Glycolysis_and_Gluconeogenesis</a> /// <a target="external" href="http://www.wikipathways.org/index.php/Pathway:Homo_sapiens:Krebs-TCA_Cyc…	acetyl-CoA metabolic process /// glycolysis /// metabolic process	pyruvate dehydrogenase (acetyl-transferring) activity /// protein binding /// oxidoreductase activity /// oxidoreductase activity, acting on the aldehyde or oxo group of donors, disulfide as acceptor	mitochondrion /// mitochondrion /// mitochondrial matrix	Human Genome U133 Plus 2.0 Array	Affymetrix NetAffx website
200982_s_at	ANXA6	annexin A6	5q32-q34	NM_001155 /// NM_004033	309	412117	114070	ENSG00000197043	A6NN80 /// A8K3Q7 /// P08133 /// Q6ZP35	NM_001155	<a target="external" href="http://www.wikipathways.org/index.php/Pathway:Homo_sapiens:Calcium_regulation_in_cardiac_cells">Calcium_regulation_in_cardiac_cells</a> /// <a target="external" href="http://www.wikipathways.org/index.php/Pathway:Homo_sapiens:Prostaglandin_synthesis_regulation">Prostaglandin_synthesis_regulation</a>	---	calcium ion binding /// protein binding /// phospholipid binding /// calcium-dependent phospholipid binding	cytoplasm /// melanosome	Human Genome U133 Plus 2.0 Array	Affymetrix NetAffx website
200984_s_at	CD59	CD59 molecule, complement regulatory protein	11p13	NM_000611 /// NM_001127223 /// NM_001127225 /// NM_001127226 /// NM_001127227 /// NM_203329 /// NM_203330 /// NM_203331	966	278573	107271	ENSG00000085063	P13987 /// Q6FHM9	X16447	---	defense response /// immune response /// cell surface receptor linked signal transduction /// blood coagulation	protein binding	extracellular region /// membrane fraction /// plasma membrane /// plasma membrane /// membrane /// anchored to membrane	Human Genome U133 Plus 2.0 Array	Affymetrix NetAffx website
200986_at	SERPING1	serpin peptidase inhibitor, clade G (C1 inhibitor), member 1, (angioedema, hereditary)	11q12-q13.1	NM_000062 /// NM_001032295	710	384598	106100 /// 606860	ENSG00000149131	A8KAI9 /// P05155 /// Q16304 /// Q5UGI5 /// Q5UGI6 /// Q7Z455	NM_000062	---	immune response /// complement activation, classical pathway /// blood coagulation /// blood circulation /// innate immune response	endopeptidase inhibitor activity /// serine-type endopeptidase inhibitor activity /// serine-type endopeptidase inhibitor activity	extracellular region /// extracellular region	Human Genome U133 Plus 2.0 Array	Affymetrix NetAffx website
200987_x_at	PSME3	proteasome (prosome, macropain) activator subunit 3 (PA28 gamma; Ki)	17q21	NM_005789 /// NM_176863	10197	152978	605129	ENSG00000131467	A8K9A3 /// P61289 /// Q6FHK7 /// Q6MZZ1	AA758755	---	---	protein binding /// proteasome activator activity /// identical protein binding	proteasome complex /// cytosol /// proteasome activator complex /// protein complex	Human Genome U133 Plus 2.0 Array	Affymetrix NetAffx website
200992_at	IPO7	importin 7	11p15.4	NM_006391	10527	712619	605586	---	O95373	AL137335	---	protein import into nucleus, docking /// transport /// intracellular protein transport /// signal transduction /// protein transport	small GTPase regulator activity /// transporter activity /// binding /// protein binding /// protein binding /// Ran GTPase binding /// protein transporter activity /// histone binding	soluble fraction /// nucleus /// nuclear pore /// nuclear pore /// cytoplasm	Human Genome U133 Plus 2.0 Array	Affymetrix NetAffx website
200996_at	ACTR3	ARP3 actin-related protein 3 homolog (yeast)	2q14.1	NM_005721	10096	433512	604222	ENSG00000115091	P61158 /// Q53QM2 /// Q59FV6	NM_005721	---	cell motility	nucleotide binding /// actin binding /// protein binding /// protein binding /// ATP binding	cytoplasm /// cytoskeleton /// Arp2/3 protein complex /// actin cytoskeleton /// lamellipodium /// cell projection	Human Genome U133 Plus 2.0 Array	Affymetrix NetAffx website
200998_s_at	CKAP4	cytoskeleton-associated protein 4	12q23.3	NM_006825 /// XM_001128142	10970	74368	---	ENSG00000136026	Q07065 /// Q6NWZ1 /// Q8TB01	AW029619	---	---	---	membrane fraction /// endoplasmic reticulum /// membrane /// integral to membrane /// integral to membrane /// ER-Golgi intermediate compartment membrane	Human Genome U133 Plus 2.0 Array	Affymetrix NetAffx website
201002_s_at	UBE2V1 /// TMEM189-UBE2V1	ubiquitin-conjugating enzyme E2 variant 1 /// TMEM189-UBE2V1	20q13.2	NM_001032288 /// NM_003349 /// NM_021988 /// NM_022442 /// NM_199144 /// NM_199203	387522 /// 7335	420529	602995	ENSG00000124208	A5PLL7 /// Q13404 /// Q5TGE0 /// Q5TGE1 /// Q5TGE2 /// Q5TGE3	U39361	---	protein polyubiquitination /// regulation of DNA repair /// regulation of transcription, DNA-dependent /// ubiquitin cycle /// cell differentiation /// positive regulation of I-kappaB kinase/NF-kappaB cascade /// post-translational protein modification /// positive regulation of NF-kappaB transcription factor activity /// regulation of protein metabolic process	protein binding /// transcription activator activity /// small conjugating protein ligase activity	nucleus /// nucleus /// cytoplasm /// endoplasmic reticulum /// endoplasmic reticulum membrane /// membrane /// integral to membrane /// ubiquitin conjugating enzyme complex	Human Genome U133 Plus 2.0 Array	Affymetrix NetAffx website
201003_x_at	RNPEP /// UBE2V1 /// TMEM189 /// TMEM189-UBE2V1 /// LOC730052	arginyl aminopeptidase (aminopeptidase B) /// ubiquitin-conjugating enzyme E2 variant 1 /// transmembrane protein 189 /// TMEM189-UBE2V1 /// similar to ubiquitin-conjugating enzyme E2	1q32 /// 20q13.2 /// 3q26.31	NM_001032288 /// NM_003349 /// NM_020216 /// NM_021988 /// NM_022442 /// NM_199129 /// NM_199144 /// NM_199203 /// XR_016022 /// XR_016054 /// XR_038933	387521 /// 387522 /// 6051 /// 730052 /// 7335	420529	602675 /// 602995 /// 610994	---	A5PLL7 /// Q13404 /// Q9H4A4	NM_003349	---	protein polyubiquitination /// regulation of DNA repair /// regulation of transcription, DNA-dependent /// proteolysis /// proteolysis /// ubiquitin cycle /// leukotriene biosynthetic process /// cell differentiation /// positive regulation of I-kappaB kinase/NF-kappaB cascade /// post-translational protein modification /// positive regulation of NF-kappaB transcription factor activity /// regula…	aminopeptidase activity /// membrane alanyl aminopeptidase activity /// epoxide hydrolase activity /// binding /// protein binding /// peptidase activity /// metalloexopeptidase activity /// metallopeptidase activity /// zinc ion binding /// zinc ion binding /// transcription activator activity /// hydrolase activity /// small conjugating protein ligase activity /// aminopeptidase B activity /// …	extracellular region /// extracellular region /// nucleus /// nucleus /// cytoplasm /// endoplasmic reticulum /// endoplasmic reticulum membrane /// plasma membrane /// membrane /// integral to membrane /// ubiquitin conjugating enzyme complex	Human Genome U133 Plus 2.0 Array	Affymetrix NetAffx website
201004_at	SSR4	signal sequence receptor, delta (translocon-associated protein delta)	Xq28	NM_006280	6748	409223	300090	ENSG00000180879	A6NLM8 /// A8K378 /// P51571	NM_006280	---	intracellular protein transport	receptor activity /// calcium ion binding /// protein binding	endoplasmic reticulum /// translocon complex /// endoplasmic reticulum membrane /// membrane /// integral to membrane	Human Genome U133 Plus 2.0 Array	Affymetrix NetAffx website
201008_s_at	TXNIP	thioredoxin interacting protein	1q21.1	NM_006472	10628	533977	606599	ENSG00000117289	Q9H3M7	AA812232	---	transcription /// regulation of transcription, DNA-dependent /// cell cycle /// keratinocyte differentiation	protein binding	cytoplasm /// cytoplasm	Human Genome U133 Plus 2.0 Array	Affymetrix NetAffx website
201009_s_at	TXNIP	thioredoxin interacting protein	1q21.1	NM_006472	10628	533977	606599	ENSG00000117289	Q9H3M7	AI439556	---	transcription /// regulation of transcription, DNA-dependent /// cell cycle /// keratinocyte differentiation	protein binding	cytoplasm /// cytoplasm	Human Genome U133 Plus 2.0 Array	Affymetrix NetAffx website
201012_at	ANXA1	annexin A1	9q12-q21.2|9q12-q21.2	NM_000700	301	494173	151690	ENSG00000135046	P04083 /// Q05BR2 /// Q5T3N0 /// Q5T3N1 /// Q5TZZ9	NM_000700	<a target="external" href="http://www.wikipathways.org/index.php/Pathway:Homo_sapiens:Prostaglandin_synthesis_regulation">Prostaglandin_synthesis_regulation</a>	lipid metabolic process /// anti-apoptosis /// cell motility /// inflammatory response /// cell cycle /// signal transduction /// signal transduction /// cell surface receptor linked signal transduction /// peptide cross-linking /// keratinocyte differentiation /// regulation of cell proliferation /// arachidonic acid secretion	phospholipase inhibitor activity /// phospholipase inhibitor activity /// receptor binding /// structural molecule activity /// calcium ion binding /// calcium ion binding /// protein binding /// protein binding /// phospholipid binding /// calcium-dependent phospholipid binding /// phospholipase A2 inhibitor activity /// protein binding, bridging	cornified envelope /// nucleus /// cytoplasm /// cytoplasm /// cilium /// membrane /// basolateral plasma membrane /// sarcolemma /// cell projection	Human Genome U133 Plus 2.0 Array	Affymetrix NetAffx website
201015_s_at	JUP	junction plakoglobin	17q21	NM_002230 /// NM_021991	3728	514174	173325 /// 601214 /// 611528	ENSG00000173801	P14923 /// Q15151 /// Q7KZ86 /// Q7L3S5 /// Q86W21 /// Q9BWC4	NM_021991	---	cell adhesion /// cell adhesion /// cell-cell adhesion	structural molecule activity /// binding /// protein binding /// protein binding /// cytoskeletal protein binding	membrane fraction /// soluble fraction /// cytoplasm /// cytoplasm /// cytosol /// cytoskeleton /// cytoskeleton /// cell-cell adherens junction /// fascia adherens /// internal side of plasma membrane /// actin cytoskeleton /// membrane /// Z disc /// cell junction /// desmosome	Human Genome U133 Plus 2.0 Array	Affymetrix NetAffx website
201017_at	EIF1AX	eukaryotic translation initiation factor 1A, X-linked	Xp22.12	NM_001412	1964	522590	300186	---	P47813	BG149698	<a target="external" href="http://www.wikipathways.org/index.php/Pathway:Homo_sapiens:Translation_Factors">Translation_Factors</a>	translation /// translational initiation /// translational initiation	RNA binding /// translation initiation factor activity /// translation factor activity, nucleic acid binding	eukaryotic translation initiation factor 4F complex	Human Genome U133 Plus 2.0 Array	Affymetrix NetAffx website
201018_at	EIF1AX	eukaryotic translation initiation factor 1A, X-linked	Xp22.12	NM_001412	1964	522590	300186	---	P47813	AL079283	<a target="external" href="http://www.wikipathways.org/index.php/Pathway:Homo_sapiens:Translation_Factors">Translation_Factors</a>	translation /// translational initiation /// translational initiation	RNA binding /// translation initiation factor activity /// translation factor activity, nucleic acid binding	eukaryotic translation initiation factor 4F complex	Human Genome U133 Plus 2.0 Array	Affymetrix NetAffx website
201019_s_at	EIF1AX /// EIF1AP1	eukaryotic translation initiation factor 1A, X-linked /// eukaryotic translation initiation factor 1A pseudogene 1	1p36.13 /// Xp22.12	NM_001412	1964 /// 280661	522590	300186	ENSG00000173674	O75642 /// P47813	NM_001412	<a target="external" href="http://www.wikipathways.org/index.php/Pathway:Homo_sapiens:Translation_Factors">Translation_Factors</a>	translation /// translational initiation /// translational initiation	RNA binding /// translation initiation factor activity /// translation factor activity, nucleic acid binding	eukaryotic translation initiation factor 4F complex	Human Genome U133 Plus 2.0 Array	Affymetrix NetAffx website
201020_at	YWHAH	tyrosine 3-monooxygenase/tryptophan 5-monooxygenase activation protein, eta polypeptide	22q12.3	NM_003405	7533	226755	113508	ENSG00000128245	A2IDB1 /// A2IDB2 /// Q04917 /// Q9H4N8	NM_003405	<a target="external" href="http://www.wikipathways.org/index.php/Pathway:Homo_sapiens:Calcium_regulation_in_cardiac_cells">Calcium_regulation_in_cardiac_cells</a> /// <a target="external" href="http://www.wikipathways.org/index.php/Pathway:Homo_sapiens:Smooth_muscle_contraction">Smooth_muscle_contraction</a>	glucocorticoid catabolic process /// intracellular protein transport /// glucocorticoid receptor signaling pathway /// regulation of neuron differentiation /// positive regulation of transcription /// regulation of synaptic plasticity /// negative regulation of dendrite morphogenesis	actin binding /// monooxygenase activity /// insulin-like growth factor receptor binding /// protein binding /// protein binding /// transcription activator activity /// protein domain specific binding /// protein domain specific binding /// glucocorticoid receptor binding	cytoplasm	Human Genome U133 Plus 2.0 Array	Affymetrix NetAffx website
201025_at	EIF5B	eukaryotic translation initiation factor 5B	2q11.2	NM_015904	9669	158688	606086	ENSG00000158417	A0JLR8 /// O60841 /// Q05CQ1 /// Q53RV7 /// Q53SI8 /// Q8N5A0	AB018284	<a target="external" href="http://www.wikipathways.org/index.php/Pathway:Homo_sapiens:Translation_Factors">Translation_Factors</a>	translation /// regulation of translational initiation /// regulation of translational initiation	nucleotide binding /// translation initiation factor activity /// translation initiation factor activity /// translation initiation factor activity /// GTPase activity /// protein binding /// GTP binding	---	Human Genome U133 Plus 2.0 Array	Affymetrix NetAffx website
201026_at	EIF5B	eukaryotic translation initiation factor 5B	2q11.2	NM_015904	9669	158688	606086	---	A0JLR8 /// O60841 /// Q05CQ1 /// Q8N5A0	AB018284	<a target="external" href="http://www.wikipathways.org/index.php/Pathway:Homo_sapiens:Translation_Factors">Translation_Factors</a>	translation /// regulation of translational initiation /// regulation of translational initiation	nucleotide binding /// translation initiation factor activity /// translation initiation factor activity /// translation initiation factor activity /// GTPase activity /// protein binding /// GTP binding	---	Human Genome U133 Plus 2.0 Array	Affymetrix NetAffx website
201027_s_at	EIF5B	eukaryotic translation initiation factor 5B	2q11.2	NM_015904	9669	158688	606086	ENSG00000158417	A0JLR8 /// O60841 /// Q05CQ1 /// Q53RV7 /// Q53SI8 /// Q8N5A0	NM_015904	<a target="external" href="http://www.wikipathways.org/index.php/Pathway:Homo_sapiens:Translation_Factors">Translation_Factors</a>	translation /// regulation of translational initiation /// regulation of translational initiation	nucleotide binding /// translation initiation factor activity /// translation initiation factor activity /// translation initiation factor activity /// GTPase activity /// protein binding /// GTP binding	---	Human Genome U133 Plus 2.0 Array	Affymetrix NetAffx website
201035_s_at	HADH	hydroxyacyl-Coenzyme A dehydrogenase	4q22-q26	NM_005327	3033	438289	231530 /// 601609 /// 609975	ENSG00000138796	Q16836 /// Q4W5B4 /// Q9UKR8	BC000306	<a target="external" href="http://www.wikipathways.org/index.php/Pathway:Homo_sapiens:Fatty_Acid_Degradation">Fatty_Acid_Degradation</a> /// <a target="external" href="http://www.wikipathways.org/index.php/Pathway:Homo_sapiens:Fatty_Acid_Synthesis">Fatty_Acid_Synthesis</a> /// <a target="external" href="http://www.wikipathways.org/index.php/Pathway:Homo_sapiens:Mitochondrial_fatty_acid_betaoxidat…	lipid metabolic process /// fatty acid metabolic process /// metabolic process	catalytic activity /// 3-hydroxyacyl-CoA dehydrogenase activity /// 3-hydroxyacyl-CoA dehydrogenase activity /// binding /// oxidoreductase activity /// coenzyme binding	cytoplasm /// mitochondrion /// mitochondrion /// mitochondrial inner membrane /// mitochondrial matrix /// membrane /// integral to membrane /// integral to membrane	Human Genome U133 Plus 2.0 Array	Affymetrix NetAffx website
201036_s_at	HADH	hydroxyacyl-Coenzyme A dehydrogenase	4q22-q26	NM_005327	3033	438289	231530 /// 601609 /// 609975	ENSG00000138796	Q16836 /// Q4W5B4	NM_005327	<a target="external" href="http://www.wikipathways.org/index.php/Pathway:Homo_sapiens:Fatty_Acid_Degradation">Fatty_Acid_Degradation</a> /// <a target="external" href="http://www.wikipathways.org/index.php/Pathway:Homo_sapiens:Fatty_Acid_Synthesis">Fatty_Acid_Synthesis</a> /// <a target="external" href="http://www.wikipathways.org/index.php/Pathway:Homo_sapiens:Mitochondrial_fatty_acid_betaoxidat…	lipid metabolic process /// fatty acid metabolic process /// metabolic process	catalytic activity /// 3-hydroxyacyl-CoA dehydrogenase activity /// 3-hydroxyacyl-CoA dehydrogenase activity /// binding /// oxidoreductase activity /// coenzyme binding	cytoplasm /// mitochondrion /// mitochondrion /// mitochondrial inner membrane /// mitochondrial matrix	Human Genome U133 Plus 2.0 Array	Affymetrix NetAffx website
201037_at	PFKP	phosphofructokinase, platelet	10p15.3-p15.2	NM_002627	5214	26010	171840	ENSG00000067057	O14943 /// Q01813 /// Q49A78 /// Q5VSR5 /// Q5VSR6 /// Q5VSR7 /// Q5VSR8 /// Q8WTZ9	NM_002627	<a target="external" href="http://www.wikipathways.org/index.php/Pathway:Homo_sapiens:Glycolysis_and_Gluconeogenesis">Glycolysis_and_Gluconeogenesis</a>	glycolysis /// glycolysis	nucleotide binding /// magnesium ion binding /// catalytic activity /// 6-phosphofructokinase activity /// 6-phosphofructokinase activity /// protein binding /// ATP binding /// kinase activity /// transferase activity /// metal ion binding	cytoplasm /// 6-phosphofructokinase complex /// 6-phosphofructokinase complex	Human Genome U133 Plus 2.0 Array	Affymetrix NetAffx website
201040_at	GNAI2	guanine nucleotide binding protein (G protein), alpha inhibiting activity polypeptide 2	3p21	NM_002070	2771	77269	139360 /// 192605	ENSG00000114353	P04899 /// Q6B6N3 /// Q6LCB5 /// Q6Q795 /// Q93020 /// Q96C71	NM_002070	<a target="external" href="http://www.wikipathways.org/index.php/Pathway:Homo_sapiens:Calcium_regulation_in_cardiac_cells">Calcium_regulation_in_cardiac_cells</a> /// <a target="external" href="http://www.wikipathways.org/index.php/Pathway:Homo_sapiens:G_Protein_Signaling">G_Protein_Signaling</a> /// <a target="external" href="http://www.wikipathways.org/index.php/Pathway:Homo_sapiens:S1P_Signali…	signal transduction /// signal transduction /// G-protein coupled receptor protein signaling pathway /// G-protein coupled receptor protein signaling pathway /// negative regulation of adenylate cyclase activity /// response to nutrient	nucleotide binding /// GTPase activity /// signal transducer activity /// protein binding /// GTP binding /// guanyl nucleotide binding	---	Human Genome U133 Plus 2.0 Array	Affymetrix NetAffx website
201041_s_at	DUSP1	dual specificity phosphatase 1	5q34	NM_004417	1843	171695	600714	ENSG00000120129	P28562	NM_004417	---	protein amino acid dephosphorylation /// response to stress /// response to oxidative stress /// cell cycle /// intracellular signaling cascade /// dephosphorylation	phosphoprotein phosphatase activity /// protein tyrosine phosphatase activity /// non-membrane spanning protein tyrosine phosphatase activity /// protein binding /// protein tyrosine/serine/threonine phosphatase activity /// hydrolase activity /// phosphoric monoester hydrolase activity /// MAP kinase tyrosine/serine/threonine phosphatase activity	---	Human Genome U133 Plus 2.0 Array	Affymetrix NetAffx website
201042_at	TGM2	transglutaminase 2 (C polypeptide, protein-glutamine-gamma-glutamyltransferase)	20q12	NM_004613 /// NM_198951	7052	517033	190196	ENSG00000198959	A2A299 /// A2A2A0 /// P21980 /// Q6B838 /// Q6DKH2 /// Q6ZTL3 /// Q9H035	AL031651	---	blood vessel remodeling /// induction of apoptosis /// peptide cross-linking /// isopeptide cross-linking via N6-(L-isoglutamyl)-L-lysine /// positive regulation of I-kappaB kinase/NF-kappaB cascade /// positive regulation of cell adhesion /// positive regulation of smooth muscle cell proliferation /// positive regulation of inflammatory response /// protein homooligomerization /// elevation of c…	protein-glutamine gamma-glutamyltransferase activity /// protein-glutamine gamma-glutamyltransferase activity /// calcium ion binding /// protein binding /// GTP binding /// acyltransferase activity /// transferase activity /// protein domain specific binding /// metal ion binding	mitochondrion /// plasma membrane	Human Genome U133 Plus 2.0 Array	Affymetrix NetAffx website
201043_s_at	ANP32A /// LOC100128146	acidic (leucine-rich) nuclear phosphoprotein 32 family, member A /// hypothetical protein LOC100128146	15q22.3-q23 /// 15q23	NM_006305 /// XM_001724880 /// XM_001725287 /// XM_001726740	100128146 /// 8125	458747	600832	ENSG00000140350 /// ENSG00000214746	P39687 /// Q08AJ6 /// Q1AHP8 /// Q3KPI8 /// Q53FK4 /// Q5J8L8 /// Q6PKH8 /// Q6ZSE5	NM_006305	---	transcription /// regulation of transcription, DNA-dependent /// nucleocytoplasmic transport /// nucleocytoplasmic transport /// intracellular signaling cascade	protein binding /// protein binding	nucleus /// nucleus /// cytoplasm /// cytoplasm /// cytoplasm /// endoplasmic reticulum /// perinuclear region of cytoplasm	Human Genome U133 Plus 2.0 Array	Affymetrix NetAffx website
201044_x_at	DUSP1	dual specificity phosphatase 1	5q34	NM_004417	1843	171695	600714	ENSG00000120129	P28562	AA530892	---	protein amino acid dephosphorylation /// response to stress /// response to oxidative stress /// cell cycle /// intracellular signaling cascade /// dephosphorylation	phosphoprotein phosphatase activity /// protein tyrosine phosphatase activity /// non-membrane spanning protein tyrosine phosphatase activity /// protein binding /// protein tyrosine/serine/threonine phosphatase activity /// hydrolase activity /// phosphoric monoester hydrolase activity /// MAP kinase tyrosine/serine/threonine phosphatase activity	---	Human Genome U133 Plus 2.0 Array	Affymetrix NetAffx website
201048_x_at	RAB6A	RAB6A, member RAS oncogene family	11q13.3	NM_002869 /// NM_198896	5870	12152	179513	ENSG00000175582	A8K133 /// P20340 /// Q1W5D8 /// Q53ET8 /// Q53S08 /// Q6AZ91 /// Q6FGX3 /// Q92929 /// Q9H0N0 /// Q9NRW1 /// Q9UL29 /// Q9UL30	NM_002869	---	transport /// retrograde vesicle-mediated transport, Golgi to ER /// small GTPase mediated signal transduction /// small GTPase mediated signal transduction /// protein transport /// vesicle-mediated transport /// response to drug	nucleotide binding /// GTPase activity /// GTPase activity /// GTPase activity /// protein binding /// GTP binding	Golgi membrane /// intracellular /// Golgi apparatus /// Golgi apparatus /// Golgi apparatus /// membrane	Human Genome U133 Plus 2.0 Array	Affymetrix NetAffx website
201050_at	PLD3	phospholipase D family, member 3	19q13.2	NM_001031696 /// NM_012268	23646	257008	---	ENSG00000105223	Q6ZQS5 /// Q8IV08 /// Q8NCL1	NM_012268	---	metabolic process /// lipid catabolic process	catalytic activity /// phospholipase D activity /// phospholipase D activity /// hydrolase activity	endoplasmic reticulum /// endoplasmic reticulum membrane /// membrane /// integral to membrane	Human Genome U133 Plus 2.0 Array	Affymetrix NetAffx website
201053_s_at	PSMF1	proteasome (prosome, macropain) inhibitor subunit 1 (PI31)	20p13	NM_006814 /// NM_178578	9491	471917	---	ENSG00000125818	Q5QPM7 /// Q5QPM9 /// Q92530	NM_006814	---	ubiquitin-dependent protein catabolic process	protein binding /// proteasome inhibitor activity	cytosol /// proteasome core complex /// protein complex	Human Genome U133 Plus 2.0 Array	Affymetrix NetAffx website
201058_s_at	MYL9	myosin, light chain 9, regulatory	20q11.23	NM_006097 /// NM_181526	10398	504687	609905	ENSG00000101335	P24844 /// Q6IBG1 /// Q71U02 /// Q9BUF9	NM_006097	<a target="external" href="http://www.wikipathways.org/index.php/Pathway:Homo_sapiens:Striated_muscle_contraction">Striated_muscle_contraction</a>	regulation of muscle contraction	motor activity /// calcium ion binding /// structural constituent of muscle	muscle myosin complex /// myosin complex	Human Genome U133 Plus 2.0 Array	Affymetrix NetAffx website
201060_x_at	STOM	stomatin	9q34.1	NM_004099 /// NM_198194	2040	253903	133090	ENSG00000148175	P27105 /// Q9H376	AI537887	---	protein homooligomerization	protein binding	cytoskeleton /// plasma membrane /// integral to plasma membrane /// membrane /// integral to membrane /// melanosome /// membrane raft	Human Genome U133 Plus 2.0 Array	Affymetrix NetAffx website
201061_s_at	STOM	stomatin	9q34.1	NM_004099 /// NM_198194	2040	253903	133090	ENSG00000148175	P27105	M81635	---	protein homooligomerization	protein binding	cytoskeleton /// plasma membrane /// integral to plasma membrane /// membrane /// integral to membrane /// melanosome /// membrane raft	Human Genome U133 Plus 2.0 Array	Affymetrix NetAffx website
201067_at	PSMC2	proteasome (prosome, macropain) 26S subunit, ATPase, 2	7q22.1-q22.3	NM_002803	5701	437366	154365	ENSG00000161057	A4D0Q1 /// P35998 /// Q3LIA5 /// Q75L23	BF215487	<a target="external" href="http://www.wikipathways.org/index.php/Pathway:Homo_sapiens:Proteasome_Degradation">Proteasome_Degradation</a>	ubiquitin-dependent protein catabolic process /// protein catabolic process	nucleotide binding /// protein binding /// ATP binding /// hydrolase activity /// ATPase activity /// nucleoside-triphosphatase activity	proteasome complex /// nucleus /// cytoplasm /// cytoplasm /// cytosol /// protein complex	Human Genome U133 Plus 2.0 Array	Affymetrix NetAffx website
201069_at	MMP2	matrix metallopeptidase 2 (gelatinase A, 72kDa gelatinase, 72kDa type IV collagenase)	16q13-q21	NM_004530	4313	513617	120360 /// 277950 /// 605156	ENSG00000087245	P08253 /// Q2EF79	NM_004530	<a target="external" href="http://www.wikipathways.org/index.php/Pathway:Homo_sapiens:Matrix_Metalloproteinases">Matrix_Metalloproteinases</a>	blood vessel maturation /// proteolysis /// proteolysis /// metabolic process /// collagen catabolic process	catalytic activity /// metalloendopeptidase activity /// gelatinase A activity /// gelatinase A activity /// calcium ion binding /// protein binding /// peptidase activity /// metallopeptidase activity /// zinc ion binding /// zinc ion binding /// hydrolase activity /// metal ion binding	extracellular region /// proteinaceous extracellular matrix /// extracellular space /// plasma membrane /// sarcomere	Human Genome U133 Plus 2.0 Array	Affymetrix NetAffx website
201070_x_at	SF3B1	splicing factor 3b, subunit 1, 155kDa	2q33.1	NM_001005526 /// NM_012433	23451	632554	605590	ENSG00000115524	A0JLT9 /// A0PJH5 /// A8K355 /// O75533 /// Q32Q20 /// Q7Z497 /// Q9NTB4	AI739389	<a target="external" href="http://www.wikipathways.org/index.php/Pathway:Homo_sapiens:mRNA_processing_Reactome">mRNA_processing_Reactome</a>	nuclear mRNA splicing, via spliceosome /// mRNA processing /// RNA splicing /// anterior/posterior pattern formation	chromatin binding /// binding /// protein binding /// protein binding /// RNA splicing factor activity, transesterification mechanism	nucleus /// spliceosome /// spliceosome /// nuclear speck	Human Genome U133 Plus 2.0 Array	Affymetrix NetAffx website
201072_s_at	SMARCC1	SWI/SNF related, matrix associated, actin dependent regulator of chromatin, subfamily c, member 1	3p23-p21	NM_003074	6599	476179	601732	ENSG00000173473	Q05BW5 /// Q05CR1 /// Q17RS0 /// Q58EY4 /// Q92922	AW152160	---	chromatin assembly or disassembly /// chromatin remodeling /// transcription /// regulation of transcription, DNA-dependent /// regulation of transcription from RNA polymerase II promoter /// organ morphogenesis /// chromatin modification /// positive regulation of transcription, DNA-dependent	DNA binding /// chromatin binding /// transcription coactivator activity /// protein binding /// protein C-terminus binding /// protein N-terminus binding	chromatin /// intracellular /// nucleus /// nucleoplasm /// SWI/SNF complex	Human Genome U133 Plus 2.0 Array	Affymetrix NetAffx website
201075_s_at	SMARCC1	SWI/SNF related, matrix associated, actin dependent regulator of chromatin, subfamily c, member 1	3p23-p21	NM_003074	6599	476179	601732	ENSG00000173473	Q05BW5 /// Q05CR1 /// Q17RS0 /// Q58EY4 /// Q92922	NM_003074	---	chromatin assembly or disassembly /// chromatin remodeling /// transcription /// regulation of transcription, DNA-dependent /// regulation of transcription from RNA polymerase II promoter /// organ morphogenesis /// chromatin modification /// positive regulation of transcription, DNA-dependent	DNA binding /// chromatin binding /// transcription coactivator activity /// protein binding /// protein C-terminus binding /// protein N-terminus binding	chromatin /// intracellular /// nucleus /// nucleoplasm /// SWI/SNF complex	Human Genome U133 Plus 2.0 Array	Affymetrix NetAffx website
201083_s_at	BCLAF1	BCL2-associated transcription factor 1	6q22-q23	NM_001077440 /// NM_001077441 /// NM_014739	9774	486542	---	ENSG00000029363	A2RU75 /// B0AZU3 /// Q6DCA8 /// Q9NYF8	AA740754	---	transcription /// regulation of transcription, DNA-dependent /// induction of apoptosis /// negative regulation of transcription /// positive regulation of apoptosis	DNA binding /// DNA binding /// protein binding /// transcription repressor activity /// transcription repressor activity	nucleus /// nucleus /// nucleus /// cytoplasm	Human Genome U133 Plus 2.0 Array	Affymetrix NetAffx website
201085_s_at	SON	SON DNA binding protein	21q22.1-q22.2|21q22.11	NM_032195 /// NM_138927	6651	517262	182465	ENSG00000159140	A0JLP4 /// P18583 /// Q3SWV4 /// Q3YL85 /// Q6PKE0 /// Q6ZRV7	AA664291	---	anti-apoptosis /// cell-matrix adhesion	nucleic acid binding /// nucleic acid binding /// DNA binding /// DNA binding /// RNA binding /// double-stranded RNA binding /// protein binding	intracellular /// nucleus /// cytoskeleton /// nuclear speck	Human Genome U133 Plus 2.0 Array	Affymetrix NetAffx website
201096_s_at	ARF4	ADP-ribosylation factor 4	3p21.2-p21.1	NM_001660	378	695943	601177	ENSG00000168374	P18085	AL537042	---	transport /// small GTPase mediated signal transduction /// protein transport /// vesicle-mediated transport	nucleotide binding /// GTPase activity /// GTP binding /// enzyme activator activity	intracellular /// Golgi apparatus	Human Genome U133 Plus 2.0 Array	Affymetrix NetAffx website
201103_x_at	NBPF14 /// NBPF1 /// KIAA1245 /// NBPF11 /// NBPF15 /// NBPF20 /// NBPF9 /// NBPF10 /// NBPF12 /// NBPF8 /// RP3-377D14.1 /// XXyac-YX155B6.1 /// NBPF16 /// LOC100132406	neuroblastoma breakpoint family, member 14 /// neuroblastoma breakpoint family, member 1 /// KIAA1245 /// neuroblastoma breakpoint family, member 11 /// neuroblastoma breakpoint family, member 15 /// neuroblastoma breakpoint family, member 20 /// neuroblastoma breakpoint family, member 9 /// neuroblastoma breakpoint family, member 10 /// neuroblastoma breakpoint family, member 12 /// neuroblastom…	1p36.13 /// 1q12-q21.2 /// 1q21.1 /// 1q21.2	NM_001037501 /// NM_001037675 /// NM_001039703 /// NM_001101663 /// NM_001102663 /// NM_015383 /// NM_017940 /// NM_173638 /// NM_183372 /// XM_001715810 /// XM_001717398 /// XM_001717802 /// XM_001721345 /// XM_001721349 /// XM_001722184 /// XM_001723523 /// XM_001726946	100132406 /// 149013 /// 200030 /// 25832 /// 284565 /// 400818 /// 440670 /// 440673 /// 440675 /// 55672 /// 641559 /// 728841 /// 728912 /// 728936	655246	608607 /// 610414 /// 610501	ENSG00000152042 /// ENSG00000168614 /// ENSG00000186275 /// ENSG00000203827 /// ENSG00000203832 /// ENSG00000203836	A2BGT5 /// A2BH96 /// A6NDD8 /// A6NFT6 /// A8K277 /// A8K2N7 /// A8K9F1 /// A8MPT6 /// A8MSG8 /// A8MYZ7 /// A8MZE3 /// Q0VGB5 /// Q3BBU2 /// Q3BBU4 /// Q3BBU5 /// Q3BBV0 /// Q3BBV1 /// Q3BBV2 /// Q3BBV3 /// Q3BBV4 /// Q3BBV5 /// Q3BBV6 /// Q3BBV7 /// Q3BBV8 /// Q3BBW0 /// Q3BBW2 /// Q3BBW3 /// Q4VC10 /// Q5RGN0 /// Q5SXJ2 /// Q5TAG4 /// Q5TB04 /// Q5TI25 /// Q5U227 /// Q6P3W6 /// Q86T75 /// Q8I…	BE299495	---	---	---	cytoplasm	Human Genome U133 Plus 2.0 Array	Affymetrix NetAffx website
201104_x_at	NBPF14 /// NBPF1 /// KIAA1245 /// NBPF11 /// NBPF15 /// NBPF20 /// NBPF9 /// NBPF10 /// NBPF12 /// NBPF8 /// RP3-377D14.1 /// XXyac-YX155B6.1 /// NBPF16 /// LOC100132406	neuroblastoma breakpoint family, member 14 /// neuroblastoma breakpoint family, member 1 /// KIAA1245 /// neuroblastoma breakpoint family, member 11 /// neuroblastoma breakpoint family, member 15 /// neuroblastoma breakpoint family, member 20 /// neuroblastoma breakpoint family, member 9 /// neuroblastoma breakpoint family, member 10 /// neuroblastoma breakpoint family, member 12 /// neuroblastom…	1p36.13 /// 1q12-q21.2 /// 1q21.1 /// 1q21.2	NM_001037501 /// NM_001037675 /// NM_001039703 /// NM_001101663 /// NM_001102663 /// NM_015383 /// NM_017940 /// NM_173638 /// NM_183372 /// XM_001715810 /// XM_001717398 /// XM_001717802 /// XM_001721345 /// XM_001721349 /// XM_001722184 /// XM_001723523 /// XM_001726946	100132406 /// 149013 /// 200030 /// 25832 /// 284565 /// 400818 /// 440670 /// 440673 /// 440675 /// 55672 /// 641559 /// 728841 /// 728912 /// 728936	655246	608607 /// 610414 /// 610501	ENSG00000122497 /// ENSG00000152042 /// ENSG00000163386 /// ENSG00000168614 /// ENSG00000186275 /// ENSG00000203827 /// ENSG00000203832 /// ENSG00000203836	A2BGT5 /// A2BH96 /// A6NDD8 /// A6NDV3 /// A6NFT6 /// A6NLP7 /// A6NN08 /// A6NP35 /// A8K277 /// A8K2N7 /// A8K9F1 /// A8MPT6 /// A8MQ30 /// A8MQ35 /// A8MSG8 /// A8MSM9 /// A8MVR3 /// A8MYZ7 /// A8MZE3 /// Q0VGB5 /// Q3BBU2 /// Q3BBU4 /// Q3BBU5 /// Q3BBV0 /// Q3BBV1 /// Q3BBV2 /// Q3BBV3 /// Q3BBV4 /// Q3BBV5 /// Q3BBV6 /// Q3BBV7 /// Q3BBV8 /// Q3BBW0 /// Q3BBW2 /// Q3BBW3 /// Q4VC10 /// Q5R…	NM_015383	---	---	---	cytoplasm	Human Genome U133 Plus 2.0 Array	Affymetrix NetAffx website
201105_at	LGALS1	lectin, galactoside-binding, soluble, 1 (galectin 1)	22q13.1	NM_002305	3956	445351	150570	ENSG00000100097	P09382 /// Q15954	NM_002305	---	apoptosis /// regulation of apoptosis /// positive regulation of I-kappaB kinase/NF-kappaB cascade /// myoblast differentiation	signal transducer activity /// protein binding /// sugar binding	extracellular space /// intracellular /// cytoplasm	Human Genome U133 Plus 2.0 Array	Affymetrix NetAffx website
201106_at	GPX4	glutathione peroxidase 4 (phospholipid hydroperoxidase)	19p13.3	NM_001039847 /// NM_001039848 /// NM_002085	2879	433951	138322	ENSG00000167468	P36969 /// Q6PI42 /// Q6PJX4	NM_002085	---	establishment and/or maintenance of chromatin architecture /// phospholipid metabolic process /// glutathione metabolic process /// response to oxidative stress /// multicellular organismal development /// spermatogenesis /// hydrogen peroxide catabolic process /// regulation of inflammatory response /// oxidation reduction	peroxidase activity /// glutathione peroxidase activity /// glutathione peroxidase activity /// selenium binding /// oxidoreductase activity /// glutathione binding /// phospholipid-hydroperoxide glutathione peroxidase activity	soluble fraction /// nucleus /// nuclear envelope /// cytoplasm /// mitochondrion /// mitochondrion /// mitochondrial inner membrane /// cytosol	Human Genome U133 Plus 2.0 Array	Affymetrix NetAffx website
201108_s_at	THBS1	thrombospondin 1	15q15	NM_003246	7057	164226	188060	ENSG00000137801	A0PJG0 /// A8K6H4 /// A8MZG1 /// P07996 /// Q59E99 /// Q7KYY3	BF055462	<a target="external" href="http://www.wikipathways.org/index.php/Pathway:Homo_sapiens:Inflammatory_Response_Pathway">Inflammatory_Response_Pathway</a> /// <a target="external" href="http://www.wikipathways.org/index.php/Pathway:Homo_sapiens:TGF_Beta_Signaling_Pathway">TGF_Beta_Signaling_Pathway</a>	cell motility /// cell adhesion /// multicellular organismal development /// nervous system development /// blood coagulation	endopeptidase inhibitor activity /// signal transducer activity /// structural molecule activity /// calcium ion binding /// protein binding /// heparin binding	extracellular region /// extracellular region	Human Genome U133 Plus 2.0 Array	Affymetrix NetAffx website
201109_s_at	THBS1	thrombospondin 1	15q15	NM_003246	7057	164226	188060	ENSG00000137801	A0PJG0 /// A8K6H4 /// A8MZG1 /// P07996 /// Q59E99 /// Q7KYY3	AV726673	<a target="external" href="http://www.wikipathways.org/index.php/Pathway:Homo_sapiens:Inflammatory_Response_Pathway">Inflammatory_Response_Pathway</a> /// <a target="external" href="http://www.wikipathways.org/index.php/Pathway:Homo_sapiens:TGF_Beta_Signaling_Pathway">TGF_Beta_Signaling_Pathway</a>	cell motility /// cell adhesion /// multicellular organismal development /// nervous system development /// blood coagulation	endopeptidase inhibitor activity /// signal transducer activity /// structural molecule activity /// calcium ion binding /// protein binding /// heparin binding	extracellular region /// extracellular region	Human Genome U133 Plus 2.0 Array	Affymetrix NetAffx website
201110_s_at	THBS1	thrombospondin 1	15q15	NM_003246	7057	164226	188060	ENSG00000137801	A0PJG0 /// A8K6H4 /// A8MZG1 /// P07996 /// Q59E99 /// Q7KYY3	NM_003246	<a target="external" href="http://www.wikipathways.org/index.php/Pathway:Homo_sapiens:Inflammatory_Response_Pathway">Inflammatory_Response_Pathway</a> /// <a target="external" href="http://www.wikipathways.org/index.php/Pathway:Homo_sapiens:TGF_Beta_Signaling_Pathway">TGF_Beta_Signaling_Pathway</a>	cell motility /// cell adhesion /// multicellular organismal development /// nervous system development /// blood coagulation	endopeptidase inhibitor activity /// signal transducer activity /// structural molecule activity /// calcium ion binding /// protein binding /// heparin binding	extracellular region /// extracellular region	Human Genome U133 Plus 2.0 Array	Affymetrix NetAffx website
201112_s_at	CSE1L	CSE1 chromosome segregation 1-like (yeast)	20q13	NM_001316	1434	90073	601342	ENSG00000124207	A3RLL6 /// P55060	NM_001316	---	protein import into nucleus, docking /// transport /// intracellular protein transport /// apoptosis /// apoptosis /// cell proliferation /// cell proliferation /// protein transport	binding /// protein binding /// importin-alpha export receptor activity /// importin-alpha export receptor activity /// protein transporter activity	nucleus /// nucleus /// nuclear pore /// cytoplasm /// cytoplasm	Human Genome U133 Plus 2.0 Array	Affymetrix NetAffx website
201116_s_at	CPE	carboxypeptidase E	4q32.3	NM_001873	1363	712551	114855	ENSG00000109472	A8K4N1 /// P16870	AI922855	---	protein modification process /// proteolysis /// neuropeptide signaling pathway /// metabolic process /// insulin processing	carboxypeptidase activity /// carboxypeptidase activity /// carboxypeptidase A activity /// carboxypeptidase E activity /// peptidase activity /// metallopeptidase activity /// zinc ion binding /// hydrolase activity /// metal ion binding	extracellular region /// plasma membrane	Human Genome U133 Plus 2.0 Array	Affymetrix NetAffx website
201117_s_at	CPE	carboxypeptidase E	4q32.3	NM_001873	1363	712551	114855	ENSG00000109472	A8K4N1 /// P16870	NM_001873	---	protein modification process /// proteolysis /// neuropeptide signaling pathway /// metabolic process /// insulin processing	carboxypeptidase activity /// carboxypeptidase activity /// carboxypeptidase A activity /// carboxypeptidase E activity /// peptidase activity /// metallopeptidase activity /// zinc ion binding /// hydrolase activity /// metal ion binding	extracellular region /// plasma membrane	Human Genome U133 Plus 2.0 Array	Affymetrix NetAffx website
201120_s_at	PGRMC1	progesterone receptor membrane component 1	Xq22-q24	NM_006667	10857	90061	300435	ENSG00000101856	O00264 /// Q6IB11	AL547946	---	axon guidance	receptor activity /// steroid binding /// steroid binding /// protein binding /// lipid binding /// heme binding /// transition metal ion binding	endoplasmic reticulum /// endoplasmic reticulum membrane /// microsome /// integral to plasma membrane /// cell surface /// membrane /// integral to membrane	Human Genome U133 Plus 2.0 Array	Affymetrix NetAffx website
201122_x_at	EIF5A	eukaryotic translation initiation factor 5A	17p13-p12	NM_001970 /// XM_001724572	1984	534314	600187	ENSG00000132507	A8K9A0 /// P63241 /// Q8WXQ9	BC000751	<a target="external" href="http://www.wikipathways.org/index.php/Pathway:Homo_sapiens:Translation_Factors">Translation_Factors</a>	mRNA export from nucleus /// translation /// translational initiation /// protein export from nucleus /// nucleocytoplasmic transport /// nucleocytoplasmic transport /// apoptosis /// induction of apoptosis /// cell proliferation /// viral genome replication /// positive regulation of translational initiation	RNA binding /// translation initiation factor activity /// translation initiation factor activity /// protein binding /// U6 snRNA binding /// protein N-terminus binding	nucleus /// nucleus /// annulate lamellae /// nuclear pore /// cytoplasm /// cytoplasm	Human Genome U133 Plus 2.0 Array	Affymetrix NetAffx website
201123_s_at	EIF5A	eukaryotic translation initiation factor 5A	17p13-p12	NM_001970 /// XM_001724572	1984	534314	600187	ENSG00000132507	A8K9A0 /// P63241 /// Q8WXQ9	NM_001970	<a target="external" href="http://www.wikipathways.org/index.php/Pathway:Homo_sapiens:Translation_Factors">Translation_Factors</a>	mRNA export from nucleus /// translation /// translational initiation /// protein export from nucleus /// nucleocytoplasmic transport /// nucleocytoplasmic transport /// apoptosis /// induction of apoptosis /// cell proliferation /// viral genome replication /// positive regulation of translational initiation	RNA binding /// translation initiation factor activity /// translation initiation factor activity /// protein binding /// U6 snRNA binding /// protein N-terminus binding	nucleus /// nucleus /// annulate lamellae /// nuclear pore /// cytoplasm /// cytoplasm	Human Genome U133 Plus 2.0 Array	Affymetrix NetAffx website
201130_s_at	CDH1	cadherin 1, type 1, E-cadherin (epithelial)	16q22.1	NM_004360	999	461086	137215 /// 192090	ENSG00000039068	A5D8W4 /// A8K1U7 /// P12830 /// Q9UII7 /// Q9UII8	L08599	<a target="external" href="http://www.wikipathways.org/index.php/Pathway:Homo_sapiens:Cell_cycle_KEGG">Cell_cycle_KEGG</a>	cell adhesion /// homophilic cell adhesion /// homophilic cell adhesion /// cell-cell adhesion /// positive regulation of transcription factor import into nucleus	calcium ion binding /// protein binding /// protein binding /// transcription activator activity /// cell adhesion molecule binding	plasma membrane /// cell-cell adherens junction /// actin cytoskeleton /// membrane /// integral to membrane /// integral to membrane /// lateral plasma membrane /// cell junction /// perinuclear region of cytoplasm	Human Genome U133 Plus 2.0 Array	Affymetrix NetAffx website
201131_s_at	CDH1	cadherin 1, type 1, E-cadherin (epithelial)	16q22.1	NM_004360	999	461086	137215 /// 192090	ENSG00000039068	A5D8W4 /// A8K1U7 /// P12830 /// Q9UII7 /// Q9UII8	NM_004360	<a target="external" href="http://www.wikipathways.org/index.php/Pathway:Homo_sapiens:Cell_cycle_KEGG">Cell_cycle_KEGG</a>	cell adhesion /// homophilic cell adhesion /// homophilic cell adhesion /// cell-cell adhesion /// positive regulation of transcription factor import into nucleus	calcium ion binding /// protein binding /// protein binding /// transcription activator activity /// cell adhesion molecule binding	plasma membrane /// cell-cell adherens junction /// actin cytoskeleton /// membrane /// integral to membrane /// integral to membrane /// lateral plasma membrane /// cell junction /// perinuclear region of cytoplasm	Human Genome U133 Plus 2.0 Array	Affymetrix NetAffx website
201137_s_at	HLA-DPB1	major histocompatibility complex, class II, DP beta 1	6p21.3	NM_002121	3115	485130	142858	ENSG00000206224	A0RZF7 /// A0RZF8 /// A0RZF9 /// A0RZG0 /// A5I886 /// A8K7H1 /// O19686 /// O19749 /// O77952 /// O98218 /// O98219 /// O98223 /// P01916 /// P04232 /// P04440 /// P13763 /// P79608 /// Q05853 /// Q0P0L4 /// Q14279 /// Q14465 /// Q29670 /// Q29683 /// Q29774 /// Q29776 /// Q29777 /// Q29778 /// Q29780 /// Q29827 /// Q29860 /// Q29898 /// Q29964 /// Q2PZR0 /// Q30015 /// Q30016 /// Q30019 /// Q30…	NM_002121	---	antigen processing and presentation of peptide or polysaccharide antigen via MHC class II /// immune response /// pathogenesis /// antigen processing and presentation	MHC class II receptor activity	membrane /// integral to membrane /// MHC class II protein complex	Human Genome U133 Plus 2.0 Array	Affymetrix NetAffx website
201138_s_at	SSB	Sjogren syndrome antigen B (autoantigen La)	2q31.1	NM_003142	6741	632535	109090	ENSG00000138385	P05455 /// Q14730 /// Q15367 /// Q2F832 /// Q53XJ4 /// Q9UMH5 /// Q9UMH6 /// Q9UMH7	BG532929	---	transcription from RNA polymerase III promoter /// RNA processing /// tRNA modification /// histone mRNA metabolic process	tRNA binding /// nucleotide binding /// nucleic acid binding /// RNA binding /// mRNA binding /// protein binding	nucleus /// ribonucleoprotein complex /// ribonucleoprotein complex	Human Genome U133 Plus 2.0 Array	Affymetrix NetAffx website
201141_at	GPNMB	glycoprotein (transmembrane) nmb	7p15	NM_001005340 /// NM_002510	10457	190495	604368	ENSG00000136235	A4D155 /// A8K7R3 /// Q14956 /// Q8IXJ5 /// Q96F58	NM_002510	---	negative regulation of cell proliferation	---	membrane /// integral to membrane /// integral to membrane /// melanosome	Human Genome U133 Plus 2.0 Array	Affymetrix NetAffx website
201147_s_at	TIMP3	TIMP metallopeptidase inhibitor 3 (Sorsby fundus dystrophy, pseudoinflammatory)	22q12.1-q13.2|22q12.3	NM_000362	7078	701968	136900 /// 188826	ENSG00000100234	P35625 /// Q14867 /// Q6LEP5	BF347089	<a target="external" href="http://www.wikipathways.org/index.php/Pathway:Homo_sapiens:Matrix_Metalloproteinases">Matrix_Metalloproteinases</a>	transmembrane receptor protein tyrosine kinase signaling pathway /// visual perception /// induction of apoptosis by extracellular signals /// response to stimulus	enzyme inhibitor activity /// protein binding /// metalloendopeptidase inhibitor activity	extracellular region /// proteinaceous extracellular matrix /// proteinaceous extracellular matrix	Human Genome U133 Plus 2.0 Array	Affymetrix NetAffx website
201149_s_at	TIMP3	TIMP metallopeptidase inhibitor 3 (Sorsby fundus dystrophy, pseudoinflammatory)	22q12.1-q13.2|22q12.3	NM_000362	7078	701968	136900 /// 188826	ENSG00000100234	P35625 /// Q14867 /// Q6LEP5	U67195	<a target="external" href="http://www.wikipathways.org/index.php/Pathway:Homo_sapiens:Matrix_Metalloproteinases">Matrix_Metalloproteinases</a>	transmembrane receptor protein tyrosine kinase signaling pathway /// visual perception /// induction of apoptosis by extracellular signals /// response to stimulus	enzyme inhibitor activity /// protein binding /// metalloendopeptidase inhibitor activity	extracellular region /// proteinaceous extracellular matrix /// proteinaceous extracellular matrix	Human Genome U133 Plus 2.0 Array	Affymetrix NetAffx website
201150_s_at	TIMP3	TIMP metallopeptidase inhibitor 3 (Sorsby fundus dystrophy, pseudoinflammatory)	22q12.1-q13.2|22q12.3	NM_000362	7078	701968	136900 /// 188826	ENSG00000100234	P35625 /// Q14867 /// Q6LEP5	NM_000362	<a target="external" href="http://www.wikipathways.org/index.php/Pathway:Homo_sapiens:Matrix_Metalloproteinases">Matrix_Metalloproteinases</a>	transmembrane receptor protein tyrosine kinase signaling pathway /// visual perception /// induction of apoptosis by extracellular signals /// response to stimulus	enzyme inhibitor activity /// protein binding /// metalloendopeptidase inhibitor activity	extracellular region /// proteinaceous extracellular matrix /// proteinaceous extracellular matrix	Human Genome U133 Plus 2.0 Array	Affymetrix NetAffx website
201151_s_at	MBNL1	muscleblind-like (Drosophila)	3q25	NM_021038 /// NM_207292 /// NM_207293 /// NM_207294 /// NM_207295 /// NM_207296 /// NM_207297	4154	478000	606516	ENSG00000152601	Q68DD0 /// Q86UV8 /// Q86UV9 /// Q86VM6 /// Q96P92 /// Q96RE3 /// Q9BS62 /// Q9NR56	BF512200	---	in utero embryonic development /// nervous system development /// muscle development /// embryonic limb morphogenesis /// myoblast differentiation	nucleic acid binding /// RNA binding /// double-stranded RNA binding /// zinc ion binding /// metal ion binding	nucleus /// nucleus /// cytoplasm	Human Genome U133 Plus 2.0 Array	Affymetrix NetAffx website
201162_at	IGFBP7	insulin-like growth factor binding protein 7	4q12	NM_001553	3490	479808	602867	ENSG00000163453	Q16270	NM_001553	---	regulation of cell growth /// negative regulation of cell proliferation	protein binding /// insulin-like growth factor binding /// growth factor binding	extracellular region	Human Genome U133 Plus 2.0 Array	Affymetrix NetAffx website
201163_s_at	IGFBP7	insulin-like growth factor binding protein 7	4q12	NM_001553	3490	479808	602867	ENSG00000163453	Q16270	NM_001553	---	regulation of cell growth /// negative regulation of cell proliferation	protein binding /// insulin-like growth factor binding /// growth factor binding	extracellular region	Human Genome U133 Plus 2.0 Array	Affymetrix NetAffx website
201164_s_at	PUM1	pumilio homolog 1 (Drosophila)	1p35.2	NM_001020658 /// NM_014676	9698	281707	607204	ENSG00000134644	A6NDW8 /// A8K6W4 /// Q14671 /// Q53HH5 /// Q5T1Z3 /// Q5T1Z4 /// Q5T1Z8	BG474429	---	regulation of translation	RNA binding /// binding	cytoplasm	Human Genome U133 Plus 2.0 Array	Affymetrix NetAffx website
201167_x_at	ARHGDIA	Rho GDP dissociation inhibitor (GDI) alpha	17q25.3	NM_004309	396	159161	601925	ENSG00000141522 /// ENSG00000215642	A8MXW0 /// P52565 /// Q6IBM5	D13989	---	anti-apoptosis /// cell motility /// negative regulation of cell adhesion /// Rho protein signal transduction	Rho GDP-dissociation inhibitor activity /// Rho GDP-dissociation inhibitor activity /// GTPase activator activity /// protein binding /// protein binding /// identical protein binding	cytoplasm /// cytoskeleton	Human Genome U133 Plus 2.0 Array	Affymetrix NetAffx website
201169_s_at	BHLHB2	basic helix-loop-helix domain containing, class B, 2	3p26	NM_003670	8553	171825	604256	ENSG00000134107	O14503 /// Q6IB83	BG326045	---	transcription /// regulation of transcription, DNA-dependent /// regulation of transcription, DNA-dependent /// entrainment of circadian clock /// regulation of transcription /// negative regulation of transcription, DNA-dependent /// regulation of neuronal synaptic plasticity	DNA binding /// transcription factor activity /// protein binding /// transcription repressor activity /// transcription regulator activity	nucleus /// nucleus	Human Genome U133 Plus 2.0 Array	Affymetrix NetAffx website
201170_s_at	BHLHB2	basic helix-loop-helix domain containing, class B, 2	3p26	NM_003670	8553	171825	604256	ENSG00000134107	O14503 /// Q6IB83	NM_003670	---	transcription /// regulation of transcription, DNA-dependent /// regulation of transcription, DNA-dependent /// entrainment of circadian clock /// regulation of transcription /// negative regulation of transcription, DNA-dependent /// regulation of neuronal synaptic plasticity	DNA binding /// transcription factor activity /// protein binding /// transcription repressor activity /// transcription regulator activity	nucleus /// nucleus	Human Genome U133 Plus 2.0 Array	Affymetrix NetAffx website
201171_at	ATP6V0E1	ATPase, H+ transporting, lysosomal 9kDa, V0 subunit e1	5q35.2	NM_003945	8992	484188	603931	---	O15342	NM_003945	---	transport /// ion transport /// ATP hydrolysis coupled proton transport /// proton transport /// proton transport	transporter activity /// ATP binding /// hydrogen ion transmembrane transporter activity /// hydrolase activity /// ATPase activity, coupled to transmembrane movement of substances /// hydrogen ion transporting ATPase activity, rotational mechanism /// hydrogen ion transporting ATPase activity, rotational mechanism	membrane fraction /// membrane /// integral to membrane /// proton-transporting two-sector ATPase complex	Human Genome U133 Plus 2.0 Array	Affymetrix NetAffx website
201179_s_at	GNAI3	guanine nucleotide binding protein (G protein), alpha inhibiting activity polypeptide 3	1p13	NM_006496	2773	73799	139370	ENSG00000065135	P08754 /// Q5TZX1	J03005	<a target="external" href="http://www.wikipathways.org/index.php/Pathway:Homo_sapiens:Calcium_regulation_in_cardiac_cells">Calcium_regulation_in_cardiac_cells</a> /// <a target="external" href="http://www.wikipathways.org/index.php/Pathway:Homo_sapiens:G_Protein_Signaling">G_Protein_Signaling</a> /// <a target="external" href="http://www.wikipathways.org/index.php/Pathway:Homo_sapiens:S1P_Signali…	transport /// signal transduction /// G-protein coupled receptor protein signaling pathway /// negative regulation of adenylate cyclase activity	nucleotide binding /// GTPase activity /// signal transducer activity /// protein binding /// GTP binding /// guanyl nucleotide binding	cytoplasm /// Golgi apparatus	Human Genome U133 Plus 2.0 Array	Affymetrix NetAffx website
201185_at	HTRA1	HtrA serine peptidase 1	10q26.3	NM_002775	5654	501280	602194 /// 610149	ENSG00000166033	A8K224 /// Q05DJ8 /// Q92743	NM_002775	---	regulation of cell growth /// proteolysis /// negative regulation of transforming growth factor beta receptor signaling pathway /// negative regulation of BMP signaling pathway	catalytic activity /// serine-type endopeptidase activity /// serine-type endopeptidase activity /// protein binding /// insulin-like growth factor binding /// peptidase activity /// hydrolase activity /// growth factor binding	extracellular region /// extracellular space	Human Genome U133 Plus 2.0 Array	Affymetrix NetAffx website
201188_s_at	ITPR3	inositol 1,4,5-triphosphate receptor, type 3	6p21	NM_002224	3710	65758	147267 /// 222100	ENSG00000096433	A6H8K3 /// Q14573 /// Q59ES2 /// Q5TAQ2 /// Q6ZRI1 /// Q6ZT26	D26351	<a target="external" href="http://www.wikipathways.org/index.php/Pathway:Homo_sapiens:Calcium_regulation_in_cardiac_cells">Calcium_regulation_in_cardiac_cells</a> /// <a target="external" href="http://www.wikipathways.org/index.php/Pathway:Homo_sapiens:Smooth_muscle_contraction">Smooth_muscle_contraction</a>	transport /// transport /// ion transport /// calcium ion transport /// signal transduction	receptor activity /// ion channel activity /// inositol 1,4,5-triphosphate-sensitive calcium-release channel activity /// calcium channel activity /// calcium ion binding /// protein binding /// inositol-1,4,5-triphosphate receptor activity /// inositol-1,4,5-triphosphate receptor activity /// calcium ion transmembrane transporter activity	endoplasmic reticulum /// endoplasmic reticulum /// endoplasmic reticulum membrane /// plasma membrane /// brush border /// membrane /// integral to membrane	Human Genome U133 Plus 2.0 Array	Affymetrix NetAffx website
201193_at	IDH1	isocitrate dehydrogenase 1 (NADP+), soluble	2q33.3	NM_005896	3417	708001	147700	ENSG00000138413	O75874 /// Q0QER2 /// Q567U4 /// Q6FHQ6 /// Q6FI37 /// Q6FIA4 /// Q7Z3V0	NM_005896	---	carbohydrate metabolic process /// glyoxylate cycle /// tricarboxylic acid cycle /// isocitrate metabolic process /// glutathione metabolic process /// response to oxidative stress /// metabolic process	magnesium ion binding /// isocitrate dehydrogenase (NADP+) activity /// isocitrate dehydrogenase (NADP+) activity /// oxidoreductase activity /// oxidoreductase activity, acting on the CH-OH group of donors, NAD or NADP as acceptor /// manganese ion binding /// metal ion binding	cytoplasm /// cytoplasm /// peroxisome /// cytosol /// cytosol	Human Genome U133 Plus 2.0 Array	Affymetrix NetAffx website
201195_s_at	SLC7A5	solute carrier family 7 (cationic amino acid transporter, y+ system), member 5	16q24.3	NM_003486	8140	513797	600182	ENSG00000103257	Q01650 /// Q2MCL6 /// Q8IV97 /// Q8MH63 /// Q96QB2 /// Q9GIP4	AB018009	---	amino acid metabolic process /// transport /// transport /// amino acid transport /// neutral amino acid transport /// L-amino acid transport	amino acid transmembrane transporter activity /// amino acid transmembrane transporter activity /// neutral amino acid transmembrane transporter activity /// L-amino acid transmembrane transporter activity /// peptide antigen binding	plasma membrane /// membrane /// integral to membrane	Human Genome U133 Plus 2.0 Array	Affymetrix NetAffx website
201198_s_at	PSMD1	proteasome (prosome, macropain) 26S subunit, non-ATPase, 1	2q37.1	NM_002807	5707	3887	---	ENSG00000173692	Q05BX4 /// Q05CW6 /// Q99460	AI860431	<a target="external" href="http://www.wikipathways.org/index.php/Pathway:Homo_sapiens:Proteasome_Degradation">Proteasome_Degradation</a>	---	binding /// protein binding	proteasome complex /// cytosol /// proteasome regulatory particle /// protein complex	Human Genome U133 Plus 2.0 Array	Affymetrix NetAffx website
201211_s_at	DDX3X	DEAD (Asp-Glu-Ala-Asp) box polypeptide 3, X-linked	Xp11.3-p11.23	NM_001356	1654	380774	300160	ENSG00000215301	A8K538 /// O00571 /// Q59GX6 /// Q5S4N1	AF061337	---	---	nucleotide binding /// nucleic acid binding /// DNA binding /// RNA binding /// ATP-dependent RNA helicase activity /// helicase activity /// ATP binding /// ATP-dependent helicase activity /// hydrolase activity	nucleus /// nucleus /// cytoplasm /// cytoplasm /// nuclear speck	Human Genome U133 Plus 2.0 Array	Affymetrix NetAffx website
201212_at	LGMN	legumain	14q32.1	NM_001008530 /// NM_005606	5641	18069	602620	ENSG00000100600	A8K669 /// Q53XC6 /// Q6I9U9 /// Q86TV2 /// Q86TV3 /// Q96CY7 /// Q99538	D55696	---	proteolysis	legumain activity /// legumain activity /// cysteine-type endopeptidase activity /// peptidase activity /// cysteine-type peptidase activity /// hydrolase activity	lysosome	Human Genome U133 Plus 2.0 Array	Affymetrix NetAffx website
201215_at	PLS3	plastin 3 (T isoform)	Xq23	NM_005032	5358	496622	300131	ENSG00000102024	A7E2S2 /// P13797 /// Q53GY0 /// Q96HI1	NM_005032	---	actin filament organization	actin binding /// calcium ion binding /// protein binding	cytoplasm /// actin cytoskeleton	Human Genome U133 Plus 2.0 Array	Affymetrix NetAffx website
201219_at	CTBP2	C-terminal binding protein 2	10q26.13	NM_001083914 /// NM_001329 /// NM_022802	1488	501345	602619	---	A8K2X5 /// P56545 /// Q1WIS0 /// Q8IY44	AW269836	---	metabolic process /// negative regulation of cell proliferation /// viral genome replication	catalytic activity /// binding /// oxidoreductase activity /// oxidoreductase activity, acting on the CH-OH group of donors, NAD or NADP as acceptor /// cofactor binding /// NAD binding	nucleus /// cell junction /// synapse	Human Genome U133 Plus 2.0 Array	Affymetrix NetAffx website
201220_x_at	CTBP2	C-terminal binding protein 2	10q26.13	NM_001083914 /// NM_001329 /// NM_022802	1488	501345	602619	ENSG00000175029	A8K2X5 /// P56545 /// Q1WIS0 /// Q5SQP8 /// Q8IY44	NM_001329	---	metabolic process /// negative regulation of cell proliferation /// viral genome replication	catalytic activity /// binding /// oxidoreductase activity /// oxidoreductase activity, acting on the CH-OH group of donors, NAD or NADP as acceptor /// cofactor binding /// NAD binding	nucleus /// cell junction /// synapse	Human Genome U133 Plus 2.0 Array	Affymetrix NetAffx website
201221_s_at	SNRP70	small nuclear ribonucleoprotein 70kDa polypeptide (RNP antigen)	19q13.3	NM_003089	6625	467097	180740	ENSG00000104852	A8KAQ5 /// P08621 /// Q15685 /// Q15688 /// Q9BRZ2 /// Q9UFS1	NM_003089	<a target="external" href="http://www.wikipathways.org/index.php/Pathway:Homo_sapiens:mRNA_processing_Reactome">mRNA_processing_Reactome</a>	nuclear mRNA splicing, via spliceosome /// nuclear mRNA splicing, via spliceosome /// mRNA processing /// mRNA processing /// RNA splicing /// regulation of RNA splicing	nucleotide binding /// nucleic acid binding /// RNA binding /// RNA binding /// RNA binding /// protein binding /// protein binding /// zinc ion binding /// metal ion binding	intracellular /// nucleus /// spliceosome /// ribonucleoprotein complex	Human Genome U133 Plus 2.0 Array	Affymetrix NetAffx website
201229_s_at	ARIH2	ariadne homolog 2 (Drosophila)	3p21.2-p21.3	NM_006321	10425	649132	605615	ENSG00000177479	O95376 /// Q53ET9 /// Q59HA2 /// Q6IBL8 /// Q8N7S6	BC000422	---	ubiquitin cycle /// multicellular organismal development	nucleic acid binding /// protein binding /// zinc ion binding /// zinc ion binding /// metal ion binding	nucleus /// nucleus	Human Genome U133 Plus 2.0 Array	Affymetrix NetAffx website
201235_s_at	BTG2	BTG family, member 2	1q32	NM_006763	7832	519162	601597	ENSG00000159388	P78543	BG339064	---	DNA repair /// transcription /// regulation of transcription, DNA-dependent /// protein amino acid methylation /// response to DNA damage stimulus /// negative regulation of cell proliferation /// anterior/posterior pattern formation /// neuron differentiation /// negative regulation of apoptosis	transcription factor activity /// protein binding /// protein binding	---	Human Genome U133 Plus 2.0 Array	Affymetrix NetAffx website
201236_s_at	BTG2	BTG family, member 2	1q32	NM_006763	7832	519162	601597	ENSG00000159388	P78543	NM_006763	---	DNA repair /// transcription /// regulation of transcription, DNA-dependent /// protein amino acid methylation /// response to DNA damage stimulus /// negative regulation of cell proliferation /// anterior/posterior pattern formation /// neuron differentiation /// negative regulation of apoptosis	transcription factor activity /// protein binding /// protein binding	---	Human Genome U133 Plus 2.0 Array	Affymetrix NetAffx website
201237_at	CAPZA2	capping protein (actin filament) muscle Z-line, alpha 2	7q31.2-q31.3	NM_006136	830	709177	601571	ENSG00000198898	A4D0V4 /// A8MW68 /// P47755 /// Q53GC7 /// Q53GE2	AV685920	---	protein complex assembly /// cell motility /// actin cytoskeleton organization and biogenesis /// barbed-end actin filament capping	actin binding /// protein binding	F-actin capping protein complex /// F-actin capping protein complex /// actin cytoskeleton	Human Genome U133 Plus 2.0 Array	Affymetrix NetAffx website
201242_s_at	ATP1B1	ATPase, Na+/K+ transporting, beta 1 polypeptide	1q24	NM_001001787 /// NM_001677	481	291196	145500 /// 182330	ENSG00000143153	A3KLL5 /// A6NGH2 /// P05026 /// Q58I20 /// Q6LEU2	BC000006	<a target="external" href="http://www.wikipathways.org/index.php/Pathway:Homo_sapiens:Calcium_regulation_in_cardiac_cells">Calcium_regulation_in_cardiac_cells</a>	response to hypoxia /// transport /// transport /// ion transport /// potassium ion transport /// sodium ion transport	sodium:potassium-exchanging ATPase activity /// sodium:potassium-exchanging ATPase activity /// potassium ion binding /// sodium ion binding	plasma membrane /// sodium:potassium-exchanging ATPase complex /// membrane /// integral to membrane /// basolateral plasma membrane	Human Genome U133 Plus 2.0 Array	Affymetrix NetAffx website
201247_at	SREBF2	sterol regulatory element binding transcription factor 2	22q13	NM_004599	6721	443258	600481	ENSG00000198911	Q05BD5 /// Q12772 /// Q8NCY3	BE513151	---	transcription /// regulation of transcription, DNA-dependent /// regulation of transcription from RNA polymerase II promoter /// lipid metabolic process /// lipid metabolic process /// steroid metabolic process /// cholesterol metabolic process /// regulation of transcription	DNA binding /// transcription factor activity /// RNA polymerase II transcription factor activity /// protein binding /// protein binding /// transcription regulator activity	Golgi membrane /// nucleus /// endoplasmic reticulum /// endoplasmic reticulum membrane /// Golgi apparatus /// membrane /// integral to membrane /// cytoplasmic vesicle	Human Genome U133 Plus 2.0 Array	Affymetrix NetAffx website
201250_s_at	SLC2A1	solute carrier family 2 (facilitated glucose transporter), member 1	1p35-p31.3	NM_006516	6513	706748	138140 /// 606777	ENSG00000117394	A6NL68 /// A8K9S6 /// A8MWM7 /// P11166 /// Q0P512 /// Q59GX2	NM_006516	---	transport /// carbohydrate transport /// glucose transport	transporter activity /// sugar:hydrogen symporter activity /// glucose transmembrane transporter activity /// glucose transmembrane transporter activity	membrane fraction /// plasma membrane /// membrane /// membrane /// integral to membrane /// melanosome	Human Genome U133 Plus 2.0 Array	Affymetrix NetAffx website
201251_at	PKM2	pyruvate kinase, muscle	15q22	NM_002654 /// NM_182470 /// NM_182471	5315	534770	179050	ENSG00000067225	A6NFK3 /// P14618 /// Q504U3 /// Q8WUW7 /// Q9NYI7 /// Q9UK31 /// Q9UKK4	NM_002654	<a target="external" href="http://www.wikipathways.org/index.php/Pathway:Homo_sapiens:Glycolysis_and_Gluconeogenesis">Glycolysis_and_Gluconeogenesis</a>	glycolysis /// glycolysis	magnesium ion binding /// catalytic activity /// pyruvate kinase activity /// pyruvate kinase activity /// protein binding /// kinase activity /// transferase activity /// potassium ion binding /// metal ion binding	cytoplasm /// cytosol	Human Genome U133 Plus 2.0 Array	Affymetrix NetAffx website
201259_s_at	SYPL1	synaptophysin-like 1	7q22.2	NM_006754 /// NM_182715	6856	80919	---	ENSG00000008282	A4D0R1 /// A4D0R2 /// A8K865 /// Q16563	AI768845	---	transport /// synaptic transmission	transporter activity	integral to plasma membrane /// synaptic vesicle /// membrane /// integral to membrane /// integral to membrane /// cytoplasmic vesicle membrane /// cytoplasmic vesicle /// melanosome	Human Genome U133 Plus 2.0 Array	Affymetrix NetAffx website
201261_x_at	BGN	biglycan	Xq28	NM_001711	633	821	301870	ENSG00000182492	A6NLG9 /// A8K7E0 /// P21810 /// Q53FI4 /// Q53HU6 /// Q8NAB7	BC002416	---	---	extracellular matrix structural constituent /// protein binding	extracellular region /// proteinaceous extracellular matrix /// proteinaceous extracellular matrix /// transport vesicle	Human Genome U133 Plus 2.0 Array	Affymetrix NetAffx website
201263_at	TARS	threonyl-tRNA synthetase	5p13.2	NM_152295	6897	481860	187790	ENSG00000113407	A8K8I1 /// P26639 /// Q53GX7 /// Q5M7Z9	NM_003191	---	translation /// tRNA aminoacylation for protein translation /// threonyl-tRNA aminoacylation /// tRNA aminoacylation	nucleotide binding /// aminoacyl-tRNA ligase activity /// threonine-tRNA ligase activity /// protein binding /// ATP binding /// ligase activity /// ligase activity, forming aminoacyl-tRNA and related compounds	soluble fraction /// cytoplasm /// cytoplasm	Human Genome U133 Plus 2.0 Array	Affymetrix NetAffx website
201266_at	TXNRD1	thioredoxin reductase 1	12q23-q24.1	NM_001093771 /// NM_003330 /// NM_182729 /// NM_182742 /// NM_182743	7296	708065	601112	ENSG00000198431	Q16881 /// Q6ZR44	NM_003330	---	transport /// response to oxidative stress /// signal transduction /// cell proliferation /// hydrogen peroxide catabolic process /// cell redox homeostasis /// oxidation reduction	thioredoxin-disulfide reductase activity /// thioredoxin-disulfide reductase activity /// selenium binding /// electron carrier activity /// protein disulfide oxidoreductase activity /// oxidoreductase activity /// oxidoreductase activity, acting on NADH or NADPH, disulfide as acceptor /// FAD binding /// NADP binding	nucleus /// cytoplasm /// cytosol	Human Genome U133 Plus 2.0 Array	Affymetrix NetAffx website
201272_at	AKR1B1	aldo-keto reductase family 1, member B1 (aldose reductase)	7q35	NM_001628	231	521212	103880	ENSG00000085662	O15289 /// P15121 /// Q59EL5 /// Q6FGA4 /// Q6ICP2	NM_001628	---	carbohydrate metabolic process /// response to stress	aldehyde reductase activity /// aldehyde reductase activity /// aldo-keto reductase activity /// protein binding /// electron carrier activity /// oxidoreductase activity	extracellular space /// cytoplasm	Human Genome U133 Plus 2.0 Array	Affymetrix NetAffx website
201275_at	FDPS	farnesyl diphosphate synthase (farnesyl pyrophosphate synthetase, dimethylallyltranstransferase, geranyltranstransferase)	1q22	NM_002004	2224	335918	134629	ENSG00000160752	P0C6T2 /// P14324 /// Q14329 /// Q96G29	NM_002004	<a target="external" href="http://www.wikipathways.org/index.php/Pathway:Homo_sapiens:Cholesterol_Biosynthesis">Cholesterol_Biosynthesis</a>	steroid biosynthetic process /// cholesterol biosynthetic process /// cholesterol biosynthetic process /// isoprenoid biosynthetic process /// lipid biosynthetic process /// sterol biosynthetic process	dimethylallyltranstransferase activity /// geranyltranstransferase activity /// transferase activity	cytoplasm /// membrane /// integral to membrane	Human Genome U133 Plus 2.0 Array	Affymetrix NetAffx website
201280_s_at	DAB2	disabled homolog 2, mitogen-responsive phosphoprotein (Drosophila)	5p13	NM_001343	1601	481980	601236	ENSG00000153071	P98082	NM_001343	---	cell proliferation	protein binding /// protein C-terminus binding	coated pit /// coated pit /// membrane /// cytoplasmic vesicle	Human Genome U133 Plus 2.0 Array	Affymetrix NetAffx website
201283_s_at	TRAK1	trafficking protein, kinesin binding 1	3p25.3-p24.1	NM_001042646 /// NM_014965	22906	535711	608112	ENSG00000182606	P13798 /// Q63HR0 /// Q659B5 /// Q9UPV9	J03068	---	regulation of transcription from RNA polymerase II promoter /// protein amino acid O-linked glycosylation /// proteolysis /// protein targeting	serine-type endopeptidase activity /// acylaminoacyl-peptidase activity /// acylaminoacyl-peptidase activity /// prolyl oligopeptidase activity /// protein binding /// protein binding /// serine-type peptidase activity /// hydrolase activity /// kinesin-associated mitochondrial adaptor activity	nucleus /// nucleus /// cytoplasm /// mitochondrion	Human Genome U133 Plus 2.0 Array	Affymetrix NetAffx website
201288_at	ARHGDIB	Rho GDP dissociation inhibitor (GDI) beta	12p12.3	NM_001175	397	504877	602843	ENSG00000111348	P52566	NM_001175	<a target="external" href="http://www.wikipathways.org/index.php/Pathway:Homo_sapiens:G13_Signaling_Pathway">G13_Signaling_Pathway</a>	cell motility /// immune response /// negative regulation of cell adhesion /// Rho protein signal transduction /// multicellular organismal development /// actin cytoskeleton organization and biogenesis	Rho GDP-dissociation inhibitor activity /// Rho GDP-dissociation inhibitor activity /// GTPase activator activity /// protein binding	cytoplasm /// cytoplasm /// cytoskeleton /// cytoplasmic membrane-bounded vesicle	Human Genome U133 Plus 2.0 Array	Affymetrix NetAffx website
201289_at	CYR61	cysteine-rich, angiogenic inducer, 61	1p31-p22	NM_001554	3491	8867	602369	ENSG00000142871	O00622 /// O95694 /// Q53FA4 /// Q6FI18 /// Q9UID7	NM_001554	<a target="external" href="http://www.wikipathways.org/index.php/Pathway:Homo_sapiens:Hypertrophy_model">Hypertrophy_model</a>	regulation of cell growth /// chemotaxis /// cell adhesion /// cell proliferation /// anatomical structure morphogenesis	protein binding /// insulin-like growth factor binding /// heparin binding /// growth factor binding	extracellular region	Human Genome U133 Plus 2.0 Array	Affymetrix NetAffx website
201291_s_at	TOP2A	topoisomerase (DNA) II alpha 170kDa	17q21-q22	NM_001067	7153	156346	126430	ENSG00000131747	A6NDM0 /// P11388	AU159942	---	DNA metabolic process /// DNA replication /// DNA topological change /// DNA ligation /// DNA repair /// response to DNA damage stimulus /// chromosome segregation /// apoptotic chromosome condensation /// positive regulation of apoptosis /// positive regulation of viral genome replication /// positive regulation of retroviral genome replication /// phosphoinositide-mediated signaling	nucleotide binding /// DNA binding /// DNA binding /// chromatin binding /// DNA topoisomerase activity /// DNA topoisomerase (ATP-hydrolyzing) activity /// DNA topoisomerase (ATP-hydrolyzing) activity /// protein kinase C binding /// protein binding /// ATP binding /// protein C-terminus binding /// DNA-dependent ATPase activity /// drug binding /// isomerase activity /// enzyme binding /// prot…	nucleus /// nucleus /// nucleoplasm /// chromosome /// chromosome /// nucleolus /// cytoplasm /// centriole /// DNA topoisomerase complex (ATP-hydrolyzing) /// viral integration complex /// protein complex	Human Genome U133 Plus 2.0 Array	Affymetrix NetAffx website
201292_at	TOP2A	topoisomerase (DNA) II alpha 170kDa	17q21-q22	NM_001067	7153	156346	126430	ENSG00000131747	A6NDM0 /// P11388	AL561834	---	DNA metabolic process /// DNA replication /// DNA topological change /// DNA ligation /// DNA repair /// response to DNA damage stimulus /// chromosome segregation /// apoptotic chromosome condensation /// positive regulation of apoptosis /// positive regulation of viral genome replication /// positive regulation of retroviral genome replication /// phosphoinositide-mediated signaling	nucleotide binding /// DNA binding /// DNA binding /// chromatin binding /// DNA topoisomerase activity /// DNA topoisomerase (ATP-hydrolyzing) activity /// DNA topoisomerase (ATP-hydrolyzing) activity /// protein kinase C binding /// protein binding /// ATP binding /// protein C-terminus binding /// DNA-dependent ATPase activity /// drug binding /// isomerase activity /// enzyme binding /// prot…	nucleus /// nucleus /// nucleoplasm /// chromosome /// chromosome /// nucleolus /// cytoplasm /// centriole /// DNA topoisomerase complex (ATP-hydrolyzing) /// viral integration complex /// protein complex	Human Genome U133 Plus 2.0 Array	Affymetrix NetAffx website
201294_s_at	WSB1	WD repeat and SOCS box-containing 1	17q11.1	NM_015626 /// NM_134265	26118	446017	610091	---	A0JLP1 /// Q53HK4 /// Q8NC76 /// Q9UG25 /// Q9Y656 /// Q9Y6I7	N24643	---	ubiquitin cycle /// intracellular signaling cascade	kinase activity	intracellular	Human Genome U133 Plus 2.0 Array	Affymetrix NetAffx website
201295_s_at	WSB1	WD repeat and SOCS box-containing 1	17q11.1	NM_015626 /// NM_134265	26118	446017	610091	---	A0JLP1 /// Q53HK4 /// Q8NC76 /// Q9Y656 /// Q9Y6I7	BF111821	---	ubiquitin cycle /// intracellular signaling cascade	kinase activity	intracellular	Human Genome U133 Plus 2.0 Array	Affymetrix NetAffx website
201297_s_at	MOBKL1B	MOB1, Mps One Binder kinase activator-like 1B (yeast)	2p13.1	NM_018221	55233	196437	609281	ENSG00000114978	A6NDE7 /// Q9H8S9	AK023321	---	---	protein binding /// protein binding /// zinc ion binding /// metal ion binding	---	Human Genome U133 Plus 2.0 Array	Affymetrix NetAffx website
201298_s_at	MOBKL1B	MOB1, Mps One Binder kinase activator-like 1B (yeast)	2p13.1	NM_018221	55233	196437	609281	ENSG00000114978	A6NDE7 /// Q9H8S9	BC003398	---	---	protein binding /// protein binding /// zinc ion binding /// metal ion binding	---	Human Genome U133 Plus 2.0 Array	Affymetrix NetAffx website
201299_s_at	MOBKL1B	MOB1, Mps One Binder kinase activator-like 1B (yeast)	2p13.1	NM_018221	55233	196437	609281	ENSG00000114978	A6NDE7 /// Q9H8S9	NM_018221	---	---	protein binding /// protein binding /// zinc ion binding /// metal ion binding	---	Human Genome U133 Plus 2.0 Array	Affymetrix NetAffx website
201300_s_at	PRNP	prion protein (p27-30) (Creutzfeldt-Jakob disease, Gerstmann-Strausler-Scheinker syndrome, fatal familial insomnia)	20p13	NM_000311 /// NM_001080121 /// NM_001080122 /// NM_001080123 /// NM_183079	5621	472010	123400 /// 137440 /// 176640 /// 600072 /// 603218 /// 606688	ENSG00000171867	A1YVW6 /// A2A2V1 /// O75942 /// P04156 /// Q15196 /// Q53YK7 /// Q540C4 /// Q5QPB4 /// Q5U0K3 /// Q6FGN5 /// Q6FGR8 /// Q6SES1 /// Q86XR1	NM_000311	---	cellular copper ion homeostasis /// anti-apoptosis /// response to oxidative stress /// response to oxidative stress /// metabolic process /// response to cadmium ion /// response to copper ion /// protein homooligomerization	copper ion binding /// copper ion binding /// protein binding /// protein binding /// microtubule binding /// tubulin binding /// identical protein binding	cytoplasm /// cytoplasm /// endoplasmic reticulum /// endoplasmic reticulum /// Golgi apparatus /// Golgi apparatus /// plasma membrane /// plasma membrane /// membrane /// extrinsic to membrane /// anchored to membrane /// membrane raft	Human Genome U133 Plus 2.0 Array	Affymetrix NetAffx website
201301_s_at	ANXA4	annexin A4	2p13	NM_001153	307	422986	106491	ENSG00000196975	P09525 /// Q59FK3 /// Q6LES2 /// Q6MZI0 /// Q6P452	BC000182	<a target="external" href="http://www.wikipathways.org/index.php/Pathway:Homo_sapiens:Prostaglandin_synthesis_regulation">Prostaglandin_synthesis_regulation</a>	anti-apoptosis /// signal transduction /// negative regulation of coagulation	phospholipase inhibitor activity /// calcium ion binding /// calcium ion binding /// calcium-dependent phospholipid binding /// calcium-dependent phospholipid binding	cytoplasm	Human Genome U133 Plus 2.0 Array	Affymetrix NetAffx website
201302_at	ANXA4	annexin A4	2p13	NM_001153	307	422986	106491	ENSG00000196975	P09525 /// Q59FK3 /// Q6LES2 /// Q6MZI0 /// Q6P452	NM_001153	<a target="external" href="http://www.wikipathways.org/index.php/Pathway:Homo_sapiens:Prostaglandin_synthesis_regulation">Prostaglandin_synthesis_regulation</a>	anti-apoptosis /// signal transduction /// negative regulation of coagulation	phospholipase inhibitor activity /// calcium ion binding /// calcium ion binding /// calcium-dependent phospholipid binding /// calcium-dependent phospholipid binding	cytoplasm	Human Genome U133 Plus 2.0 Array	Affymetrix NetAffx website
201308_s_at	SEPT11	septin 11	4q21.1	NM_018243	55752	128199	---	ENSG00000138758	Q4W5G1 /// Q96KC0 /// Q9NVA2 /// Q9UFY9	NM_018243	---	cell cycle /// protein heterooligomerization /// cell division	nucleotide binding /// protein binding /// protein binding /// GTP binding	stress fiber /// septin complex	Human Genome U133 Plus 2.0 Array	Affymetrix NetAffx website
201310_s_at	C5orf13	chromosome 5 open reading frame 13	5q22.1	NM_004772	9315	36053	607332	ENSG00000134986	A4D152 /// Q16612 /// Q9P187	NM_004772	---	regulation of transforming growth factor beta receptor signaling pathway	protein binding	---	Human Genome U133 Plus 2.0 Array	Affymetrix NetAffx website
201312_s_at	SH3BGRL	SH3 domain binding glutamic acid-rich protein like	Xq13.3	NM_003022	6451	108029	300190	ENSG00000131171	B0AZV6 /// O75368	NM_003022	---	---	SH3/SH2 adaptor activity	nucleus /// cytoplasm	Human Genome U133 Plus 2.0 Array	Affymetrix NetAffx website
201315_x_at	IFITM2	interferon induced transmembrane protein 2 (1-8D)	11p15.5	NM_006435	10581	709321	605578	---	Q01629 /// Q14617 /// Q6FH82 /// Q6IBB0	NM_006435	---	immune response /// response to biotic stimulus	protein binding	membrane /// integral to membrane	Human Genome U133 Plus 2.0 Array	Affymetrix NetAffx website
201316_at	PSMA2	proteasome (prosome, macropain) subunit, alpha type, 2	7p13	NM_002787	5683	333786	176842	ENSG00000106588	P25787 /// Q53GF5 /// Q6ICS6 /// Q6MZI6	AL523904	<a target="external" href="http://www.wikipathways.org/index.php/Pathway:Homo_sapiens:Proteasome_Degradation">Proteasome_Degradation</a>	ubiquitin-dependent protein catabolic process	endopeptidase activity /// threonine endopeptidase activity /// protein binding /// peptidase activity /// hydrolase activity	proteasome complex /// nucleus /// cytoplasm /// cytosol /// proteasome core complex /// protein complex	Human Genome U133 Plus 2.0 Array	Affymetrix NetAffx website
201323_at	EBNA1BP2	EBNA1 binding protein 2	1p35-p33	NM_006824	10969	346868	---	ENSG00000117395	Q6IB29 /// Q99848	NM_006824	---	ribosome biogenesis and assembly	protein binding	membrane fraction /// nucleus	Human Genome U133 Plus 2.0 Array	Affymetrix NetAffx website
201324_at	EMP1	epithelial membrane protein 1	12p12.3	NM_001423	2012	436298	602333	ENSG00000134531	P54849 /// Q8WWD6	NM_001423	---	multicellular organismal development /// cell death /// cell proliferation /// epidermis development /// cell growth	---	membrane fraction /// membrane /// integral to membrane /// integral to membrane	Human Genome U133 Plus 2.0 Array	Affymetrix NetAffx website
201325_s_at	EMP1	epithelial membrane protein 1	12p12.3	NM_001423	2012	436298	602333	ENSG00000134531	P54849 /// Q8WWD6	NM_001423	---	multicellular organismal development /// cell death /// cell proliferation /// epidermis development /// cell growth	---	membrane fraction /// membrane /// integral to membrane /// integral to membrane	Human Genome U133 Plus 2.0 Array	Affymetrix NetAffx website
201328_at	ETS2	v-ets erythroblastosis virus E26 oncogene homolog 2 (avian)	21q22.3|21q22.2	NM_005239	2114	709198	164740	ENSG00000157557	P15036 /// Q53Y89	AL575509	<a target="external" href="http://www.wikipathways.org/index.php/Pathway:Homo_sapiens:Smooth_muscle_contraction">Smooth_muscle_contraction</a>	skeletal development /// regulation of transcription, DNA-dependent	DNA binding /// DNA binding /// transcription factor activity /// transcription factor activity /// protein binding /// sequence-specific DNA binding	nucleus /// nucleus	Human Genome U133 Plus 2.0 Array	Affymetrix NetAffx website
201329_s_at	ETS2	v-ets erythroblastosis virus E26 oncogene homolog 2 (avian)	21q22.3|21q22.2	NM_005239	2114	709198	164740	ENSG00000157557	P15036 /// Q53Y89	NM_005239	<a target="external" href="http://www.wikipathways.org/index.php/Pathway:Homo_sapiens:Smooth_muscle_contraction">Smooth_muscle_contraction</a>	skeletal development /// regulation of transcription, DNA-dependent	DNA binding /// DNA binding /// transcription factor activity /// transcription factor activity /// protein binding /// sequence-specific DNA binding	nucleus /// nucleus	Human Genome U133 Plus 2.0 Array	Affymetrix NetAffx website
201331_s_at	STAT6	signal transducer and activator of transcription 6, interleukin-4 induced	12q13	NM_003153	6778	524518	601512	ENSG00000166888	A8K316 /// A8K4S9 /// P42226 /// Q56TK0 /// Q5FBW6 /// Q6LCD8 /// Q9BQD2	BC004973	---	negative regulation of T-helper 2 type immune response /// transcription /// regulation of transcription, DNA-dependent /// regulation of transcription from RNA polymerase II promoter /// signal transduction /// signal transduction /// regulation of cell proliferation /// regulation of transcription /// positive regulation of transcription from RNA polymerase II promoter /// positive regulation o…	DNA binding /// transcription factor activity /// transcription factor activity /// signal transducer activity /// calcium ion binding /// protein binding /// protein binding /// ubiquinol-cytochrome-c reductase activity /// sequence-specific DNA binding	nucleus /// cytoplasm /// membrane	Human Genome U133 Plus 2.0 Array	Affymetrix NetAffx website
201337_s_at	VAMP3	vesicle-associated membrane protein 3 (cellubrevin)	1p36.23	NM_004781	9341	66708	603657	ENSG00000049245	A8MVP3 /// Q15836 /// Q6FGG2 /// Q9BRV4	NM_004781	---	protein complex assembly /// exocytosis /// vesicle docking during exocytosis /// membrane fusion /// vesicle-mediated transport /// calcium ion-dependent exocytosis	---	membrane /// integral to membrane /// integral to membrane /// synaptosome /// cell junction /// synapse	Human Genome U133 Plus 2.0 Array	Affymetrix NetAffx website
201339_s_at	SCP2	sterol carrier protein 2	1p32	NM_001007098 /// NM_001007099 /// NM_001007100 /// NM_001007250 /// NM_002979	6342	476365	184755	ENSG00000116171	A6NM69 /// P22307 /// Q59HG9 /// Q5VVZ1 /// Q6NXF4	NM_002979	<a target="external" href="http://www.wikipathways.org/index.php/Pathway:Homo_sapiens:Mitochondrial_fatty_acid_betaoxidation">Mitochondrial_fatty_acid_betaoxidation</a>	steroid biosynthetic process /// transport /// lipid transport /// metabolic process	catalytic activity /// sterol carrier activity /// sterol carrier activity /// protein binding /// lipid binding /// oxidoreductase activity /// transferase activity /// propanoyl-CoA C-acyltransferase activity	cytoplasm /// mitochondrion /// peroxisome /// peroxisome	Human Genome U133 Plus 2.0 Array	Affymetrix NetAffx website
201340_s_at	ENC1	ectodermal-neural cortex (with BTB-like domain)	5q12-q13.3	NM_003633	8507	104925	605173	ENSG00000171617	O14682 /// Q53XS2 /// Q96L69	AF010314	---	ubiquitin cycle /// multicellular organismal development /// multicellular organismal development /// nervous system development	actin binding /// protein binding	nucleus /// nucleus /// cytoplasm /// cytoskeleton /// nuclear matrix	Human Genome U133 Plus 2.0 Array	Affymetrix NetAffx website
201348_at	GPX3	glutathione peroxidase 3 (plasma)	5q23	NM_002084	2878	386793	138321	---	P22352 /// Q6NXQ3	NM_002084	---	glutathione metabolic process /// response to oxidative stress /// response to lipid hydroperoxide /// hydrogen peroxide catabolic process /// hydrogen peroxide catabolic process /// protein homotetramerization	peroxidase activity /// glutathione peroxidase activity /// glutathione peroxidase activity /// protein binding /// transcription factor binding /// selenium binding /// selenium binding /// oxidoreductase activity /// glutathione binding	extracellular region /// extracellular space /// soluble fraction	Human Genome U133 Plus 2.0 Array	Affymetrix NetAffx website
201350_at	FLOT2	flotillin 2	17q11-q12	NM_004475	2319	514038	131560	ENSG00000132589	Q14254 /// Q6FG43 /// Q9BTI6	NM_004475	---	cell adhesion /// cell adhesion /// epidermis development	protein binding /// protein binding	plasma membrane /// caveola /// cell surface /// membrane /// integral to membrane /// flotillin complex /// membrane raft	Human Genome U133 Plus 2.0 Array	Affymetrix NetAffx website
201351_s_at	YME1L1	YME1-like 1 (S. cerevisiae)	10p14	NM_014263 /// NM_139312	10730	499145	607472	ENSG00000136758	A8K5H7 /// Q5T8D1 /// Q5T8D2 /// Q5T8D9 /// Q6PJ89 /// Q96I63 /// Q96TA2 /// Q9NQ51 /// Q9Y2Q2	AF070656	---	proteolysis /// protein catabolic process	nucleotide binding /// metalloendopeptidase activity /// ATP binding /// peptidase activity /// metallopeptidase activity /// zinc ion binding /// hydrolase activity /// nucleoside-triphosphatase activity /// metal ion binding	mitochondrion /// membrane	Human Genome U133 Plus 2.0 Array	Affymetrix NetAffx website
201359_at	COPB1	coatomer protein complex, subunit beta 1	11p15.2	NM_016451	1315	339278	600959	ENSG00000129083	P53618	NM_016451	---	protein complex assembly /// transport /// intracellular protein transport /// intra-Golgi vesicle-mediated transport /// intra-Golgi vesicle-mediated transport /// protein transport /// vesicle-mediated transport	structural molecule activity /// binding /// protein binding /// protein binding /// protein binding /// protein transporter activity	Golgi membrane /// Golgi membrane /// cytoplasm /// Golgi apparatus /// Golgi-associated vesicle /// cytosol /// membrane /// membrane coat /// COPI vesicle coat /// COPI vesicle coat /// cytoplasmic vesicle	Human Genome U133 Plus 2.0 Array	Affymetrix NetAffx website
201360_at	CST3	cystatin C	20p11.21	NM_000099	1471	304682	105150 /// 604312 /// 611953	ENSG00000101439	P01034	NM_000099	---	---	endopeptidase inhibitor activity /// cysteine protease inhibitor activity /// cysteine protease inhibitor activity /// protein homodimerization activity	extracellular region	Human Genome U133 Plus 2.0 Array	Affymetrix NetAffx website
201361_at	TMEM109	transmembrane protein 109	11q12.2	NM_024092	79073	13662	---	ENSG00000110108	Q9BVC6	NM_024092	---	---	---	nucleus /// nuclear outer membrane /// endoplasmic reticulum /// endoplasmic reticulum membrane /// membrane /// integral to membrane /// sarcoplasmic reticulum /// sarcoplasmic reticulum membrane	Human Genome U133 Plus 2.0 Array	Affymetrix NetAffx website
201362_at	IVNS1ABP	influenza virus NS1A binding protein	1q25.1-q31.1	NM_006469	10625	497183	609209	ENSG00000116679	A8K8R6 /// A8MVR0 /// Q6MZF3 /// Q9Y6Y0	AF205218	---	transcription from RNA polymerase III promoter /// RNA splicing /// response to virus	protein binding	nucleus /// transcription factor complex /// spliceosome /// cytoplasm /// cytoskeleton	Human Genome U133 Plus 2.0 Array	Affymetrix NetAffx website
201363_s_at	IVNS1ABP	influenza virus NS1A binding protein	1q25.1-q31.1	NM_006469	10625	497183	609209	ENSG00000116679	A8K8R6 /// A8MVR0 /// Q6MZF3 /// Q9Y6Y0	AB020657	---	transcription from RNA polymerase III promoter /// RNA splicing /// response to virus	protein binding	nucleus /// transcription factor complex /// spliceosome /// cytoplasm /// cytoskeleton	Human Genome U133 Plus 2.0 Array	Affymetrix NetAffx website
201364_s_at	OAZ2	ornithine decarboxylase antizyme 2	15q22.31	NM_002537	4947	74563	604152	ENSG00000180304	O95190 /// Q9HD73	AF242521	---	polyamine metabolic process	enzyme inhibitor activity /// protein binding /// protein binding /// ornithine decarboxylase inhibitor activity /// ornithine decarboxylase inhibitor activity	---	Human Genome U133 Plus 2.0 Array	Affymetrix NetAffx website
201367_s_at	ZFP36L2	zinc finger protein 36, C3H type-like 2	2p22.3-p21	NM_006887	678	503093	---	ENSG00000152518	P47974 /// Q53TB4	AI356398	---	nuclear-transcribed mRNA catabolic process, deadenylation-dependent decay /// cell proliferation	nucleic acid binding /// DNA binding /// transcription factor activity /// RNA binding /// zinc ion binding /// metal ion binding	nucleus /// cytoplasm	Human Genome U133 Plus 2.0 Array	Affymetrix NetAffx website
201369_s_at	ZFP36L2	zinc finger protein 36, C3H type-like 2	2p22.3-p21	NM_006887	678	503093	---	ENSG00000152518	P47974 /// Q53TB4	NM_006887	---	nuclear-transcribed mRNA catabolic process, deadenylation-dependent decay /// cell proliferation	nucleic acid binding /// DNA binding /// transcription factor activity /// RNA binding /// zinc ion binding /// metal ion binding	nucleus /// cytoplasm	Human Genome U133 Plus 2.0 Array	Affymetrix NetAffx website
201373_at	PLEC1	plectin 1, intermediate filament binding protein 500kDa	8q24	NM_000445 /// NM_201378 /// NM_201379 /// NM_201380 /// NM_201381 /// NM_201382 /// NM_201383 /// NM_201384	5339	434248	131950 /// 226670 /// 601282	ENSG00000178209	Q15149 /// Q6S377 /// Q6S378 /// Q6S379 /// Q6S380 /// Q6S381 /// Q6S382 /// Q6S383 /// Q8WXV5 /// Q8WXV6 /// Q96IE3	NM_000445	---	cytoskeletal anchoring	actin binding /// structural molecule activity /// structural constituent of cytoskeleton /// structural constituent of muscle	cytoplasm /// cytoskeleton /// intermediate filament /// plasma membrane	Human Genome U133 Plus 2.0 Array	Affymetrix NetAffx website
201376_s_at	HNRNPF	heterogeneous nuclear ribonucleoprotein F	10q11.21-q11.22	NM_001098204 /// NM_001098205 /// NM_001098206 /// NM_001098207 /// NM_001098208 /// NM_004966	3185	808	601037	ENSG00000169813	P52597 /// Q8NI96	AI591354	---	RNA processing /// mRNA processing /// RNA splicing /// regulation of RNA splicing	nucleotide binding /// nucleic acid binding /// RNA binding /// RNA binding /// protein binding	nucleus /// nucleus /// spliceosome /// ribonucleoprotein complex /// heterogeneous nuclear ribonucleoprotein complex	Human Genome U133 Plus 2.0 Array	Affymetrix NetAffx website
201389_at	ITGA5	integrin, alpha 5 (fibronectin receptor, alpha polypeptide)	12q11-q13	NM_002205	3678	505654	135620	ENSG00000161638	A8K6A5 /// P08648	NM_002205	<a target="external" href="http://www.wikipathways.org/index.php/Pathway:Homo_sapiens:Integrin-mediated_cell_adhesion_KEGG">Integrin-mediated_cell_adhesion_KEGG</a>	cell-substrate junction assembly /// cell adhesion /// cell adhesion /// integrin-mediated signaling pathway /// memory	receptor activity /// integrin binding /// calcium ion binding /// protein binding	ruffle /// integrin complex /// integrin complex /// membrane /// integral to membrane /// synaptosome	Human Genome U133 Plus 2.0 Array	Affymetrix NetAffx website
201392_s_at	IGF2R	insulin-like growth factor 2 receptor	6q26	NM_000876	3482	487062	147280	ENSG00000197081	A0N9R6 /// A0N9R7 /// P11717 /// Q13660 /// Q13661 /// Q59EZ3	BG031974	---	transport /// receptor-mediated endocytosis /// signal transduction	receptor activity /// receptor activity /// insulin-like growth factor receptor activity /// transporter activity /// protein binding /// insulin-like growth factor binding	nucleus /// nuclear envelope lumen /// cytoplasm /// lysosome /// lysosomal membrane /// endosome /// integral to plasma membrane /// membrane /// integral to membrane /// trans-Golgi network transport vesicle	Human Genome U133 Plus 2.0 Array	Affymetrix NetAffx website
201393_s_at	IGF2R	insulin-like growth factor 2 receptor	6q26	NM_000876	3482	487062	147280	ENSG00000197081	A0N9R6 /// A0N9R7 /// P11717 /// Q13660 /// Q13661 /// Q59EZ3	NM_000876	---	transport /// receptor-mediated endocytosis /// signal transduction	receptor activity /// receptor activity /// insulin-like growth factor receptor activity /// transporter activity /// protein binding /// insulin-like growth factor binding	nucleus /// nuclear envelope lumen /// cytoplasm /// lysosome /// lysosomal membrane /// endosome /// integral to plasma membrane /// membrane /// integral to membrane /// trans-Golgi network transport vesicle	Human Genome U133 Plus 2.0 Array	Affymetrix NetAffx website
201399_s_at	TRAM1	translocation associated membrane protein 1	8q13.3	NM_014294	23471	491988	605190	ENSG00000067167	A8K032 /// Q15629 /// Q6FHL3 /// Q6FHU7 /// Q9H3B6	NM_014294	---	cotranslational protein targeting to membrane /// transport /// protein transport /// intracellular protein transport across a membrane	receptor activity	endoplasmic reticulum /// endoplasmic reticulum /// endoplasmic reticulum membrane /// membrane /// integral to membrane /// integral to membrane	Human Genome U133 Plus 2.0 Array	Affymetrix NetAffx website
201401_s_at	ADRBK1	adrenergic, beta, receptor kinase 1	11q13.1	NM_001619	156	83636	109635	ENSG00000173020	P25098 /// Q59F73	M80776	---	regulation of the force of heart contraction /// desensitization of G-protein coupled receptor protein signaling pathway /// desensitization of G-protein coupled receptor protein signaling pathway /// negative regulation of the force of heart contraction by chemical signal /// protein amino acid phosphorylation /// signal transduction /// G-protein coupled receptor protein signaling pathway /// a…	nucleotide binding /// protein kinase activity /// protein kinase activity /// protein serine/threonine kinase activity /// G-protein coupled receptor kinase activity /// G-protein coupled receptor kinase activity /// signal transducer activity /// receptor activity /// protein binding /// protein binding /// ATP binding /// kinase activity /// transferase activity /// beta-adrenergic receptor ki…	soluble fraction /// cytoplasm /// membrane /// membrane	Human Genome U133 Plus 2.0 Array	Affymetrix NetAffx website
201407_s_at	PPP1CB	protein phosphatase 1, catalytic subunit, beta isoform	2p23	NM_002709 /// NM_206876	5500	705383	600590	ENSG00000213639	P62140	AI186712	<a target="external" href="http://www.wikipathways.org/index.php/Pathway:Homo_sapiens:G13_Signaling_Pathway">G13_Signaling_Pathway</a> /// <a target="external" href="http://www.wikipathways.org/index.php/Pathway:Mus_musculus:G13_Signaling_Pathway">G13_Signaling_Pathway</a> /// <a target="external" href="http://www.wikipathways.org/index.php/Pathway:Rattus_norvegicus:G13_Signaling_Pathway">G13_Sig…	carbohydrate metabolic process /// glycogen metabolic process /// protein amino acid dephosphorylation /// cell cycle /// cell division	phosphoprotein phosphatase activity /// iron ion binding /// protein binding /// protein binding /// hydrolase activity /// manganese ion binding /// metal ion binding	cytoplasm	Human Genome U133 Plus 2.0 Array	Affymetrix NetAffx website
201408_at	PPP1CB	protein phosphatase 1, catalytic subunit, beta isoform	2p23	NM_002709 /// NM_206876	5500	705383	600590	ENSG00000213639	P62140	W67887	<a target="external" href="http://www.wikipathways.org/index.php/Pathway:Homo_sapiens:G13_Signaling_Pathway">G13_Signaling_Pathway</a> /// <a target="external" href="http://www.wikipathways.org/index.php/Pathway:Mus_musculus:G13_Signaling_Pathway">G13_Signaling_Pathway</a> /// <a target="external" href="http://www.wikipathways.org/index.php/Pathway:Rattus_norvegicus:G13_Signaling_Pathway">G13_Sig…	carbohydrate metabolic process /// glycogen metabolic process /// protein amino acid dephosphorylation /// cell cycle /// cell division	phosphoprotein phosphatase activity /// iron ion binding /// protein binding /// protein binding /// hydrolase activity /// manganese ion binding /// metal ion binding	cytoplasm	Human Genome U133 Plus 2.0 Array	Affymetrix NetAffx website
201409_s_at	PPP1CB	protein phosphatase 1, catalytic subunit, beta isoform	2p23	NM_002709 /// NM_206876	5500	705383	600590	ENSG00000213639	P62140	NM_002709	<a target="external" href="http://www.wikipathways.org/index.php/Pathway:Homo_sapiens:G13_Signaling_Pathway">G13_Signaling_Pathway</a> /// <a target="external" href="http://www.wikipathways.org/index.php/Pathway:Mus_musculus:G13_Signaling_Pathway">G13_Signaling_Pathway</a> /// <a target="external" href="http://www.wikipathways.org/index.php/Pathway:Rattus_norvegicus:G13_Signaling_Pathway">G13_Sig…	carbohydrate metabolic process /// glycogen metabolic process /// protein amino acid dephosphorylation /// cell cycle /// cell division	phosphoprotein phosphatase activity /// iron ion binding /// protein binding /// protein binding /// hydrolase activity /// manganese ion binding /// metal ion binding	cytoplasm	Human Genome U133 Plus 2.0 Array	Affymetrix NetAffx website
201411_s_at	PLEKHB2	pleckstrin homology domain containing, family B (evectins) member 2	2q21.1	NM_001100623 /// NM_017958	55041	469944	---	ENSG00000115762	Q53FF1 /// Q53TH7 /// Q96CS7	NM_017958	---	---	protein binding	membrane	Human Genome U133 Plus 2.0 Array	Affymetrix NetAffx website
201416_at	SOX4	SRY (sex determining region Y)-box 4	6p22.3	NM_003107	6659	699195	184430	ENSG00000124766	Q06945	BG528420	---	transcription /// regulation of transcription, DNA-dependent	DNA binding /// transcription factor activity	nucleus	Human Genome U133 Plus 2.0 Array	Affymetrix NetAffx website
201422_at	PIK3R2 /// IFI30	phosphoinositide-3-kinase, regulatory subunit 2 (beta) /// interferon, gamma-inducible protein 30	19p13.1 /// 19q13.2-q13.4	NM_005027 /// NM_006332	10437 /// 5296	371344	603157 /// 604664	---	A6XNE3 /// A8K686 /// O00459 /// P13284 /// Q05BV6 /// Q6ZW82 /// Q76MF9 /// Q8NEI4 /// Q8WU77 /// Q96CK7 /// Q96EV4 /// Q96P99	NM_006332	<a target="external" href="http://www.wikipathways.org/index.php/Pathway:Homo_sapiens:G13_Signaling_Pathway">G13_Signaling_Pathway</a> /// <a target="external" href="http://www.wikipathways.org/index.php/Pathway:Homo_sapiens:Integrin-mediated_cell_adhesion_KEGG">Integrin-mediated_cell_adhesion_KEGG</a>	signal transduction /// negative regulation of anti-apoptosis /// negative regulation of anti-apoptosis	protein binding /// protein binding /// 1-phosphatidylinositol-3-kinase activity /// 1-phosphatidylinositol-3-kinase activity /// oxidoreductase activity /// phosphoinositide 3-kinase regulator activity	extracellular region /// intracellular /// lysosome /// lysosome /// phosphoinositide 3-kinase complex	Human Genome U133 Plus 2.0 Array	Affymetrix NetAffx website
201424_s_at	CUL4A	cullin 4A	13q34	NM_001008895 /// NM_003589	8451	339735	603137	ENSG00000139842	A2A2W2 /// A8MSH7 /// Q13619	NM_003589	---	G1/S transition of mitotic cell cycle /// DNA repair /// ubiquitin-dependent protein catabolic process /// ubiquitin cycle /// response to DNA damage stimulus /// cell cycle arrest /// negative regulation of cell proliferation /// induction of apoptosis by intracellular signals	protein binding /// ubiquitin protein ligase binding	cullin-RING ubiquitin ligase complex	Human Genome U133 Plus 2.0 Array	Affymetrix NetAffx website
201426_s_at	VIM	vimentin	10p13	NM_003380	7431	642813	193060	ENSG00000026025	P08670 /// Q53HU8 /// Q8N9S6	AI922599	<a target="external" href="http://www.wikipathways.org/index.php/Pathway:Homo_sapiens:Striated_muscle_contraction">Striated_muscle_contraction</a>	cell motility /// intermediate filament-based process	structural molecule activity /// structural constituent of cytoskeleton /// protein binding /// protein binding /// protein binding	cytoplasm /// cytoplasm /// cytoskeleton /// cytoskeleton /// intermediate filament /// intermediate filament	Human Genome U133 Plus 2.0 Array	Affymetrix NetAffx website
201427_s_at	SEPP1	selenoprotein P, plasma, 1	5q31	NM_001085486 /// NM_001093726 /// NM_005410	6414	709405	601484	---	P49908 /// Q4G0S7	NM_005410	<a target="external" href="http://www.wikipathways.org/index.php/Pathway:Homo_sapiens:Integrin-mediated_cell_adhesion_KEGG">Integrin-mediated_cell_adhesion_KEGG</a>	selenium metabolic process /// response to oxidative stress /// brain development /// locomotory behavior /// post-embryonic development /// sexual reproduction /// growth	selenium binding /// selenium binding	extracellular region /// extracellular region /// extracellular space	Human Genome U133 Plus 2.0 Array	Affymetrix NetAffx website
201428_at	CLDN4	claudin 4	7q11.23	NM_001305	1364	710735	602909	ENSG00000189143	O14493 /// Q75L80	NM_001305	---	pathogenesis /// calcium-independent cell-cell adhesion	transmembrane receptor activity /// structural molecule activity /// protein binding /// identical protein binding	plasma membrane /// integral to plasma membrane /// tight junction /// tight junction /// membrane /// integral to membrane /// cell junction	Human Genome U133 Plus 2.0 Array	Affymetrix NetAffx website
201431_s_at	DPYSL3	dihydropyrimidinase-like 3	5q32	NM_001387	1809	519659	601168	ENSG00000113657	Q14195 /// Q6DEN2 /// Q8IXW6	NM_001387	---	nucleobase, nucleoside, nucleotide and nucleic acid metabolic process /// signal transduction /// nervous system development /// nervous system development	dihydropyrimidinase activity /// hydrolase activity /// hydrolase activity, acting on carbon-nitrogen (but not peptide) bonds	cytoplasm /// cell projection	Human Genome U133 Plus 2.0 Array	Affymetrix NetAffx website
201435_s_at	EIF4E	eukaryotic translation initiation factor 4E	4q21-q25	NM_001968	1977	249718	133440	ENSG00000151247	A8MX72 /// P06730 /// Q32Q75	AW268640	<a target="external" href="http://www.wikipathways.org/index.php/Pathway:Homo_sapiens:Hypertrophy_model">Hypertrophy_model</a> /// <a target="external" href="http://www.wikipathways.org/index.php/Pathway:Homo_sapiens:Translation_Factors">Translation_Factors</a>	translation /// translational initiation /// regulation of translation	RNA cap binding /// RNA binding /// translation initiation factor activity /// translation initiation factor activity /// translation initiation factor activity /// protein binding	cytoplasm /// eukaryotic translation initiation factor 4F complex	Human Genome U133 Plus 2.0 Array	Affymetrix NetAffx website
201436_at	EIF4E /// LOC100131565 /// LOC100132918	eukaryotic translation initiation factor 4E /// similar to Eukaryotic translation initiation factor 4E /// similar to hCG1777996	3q26.33 /// 4q21-q25 /// 8p22	NM_001968 /// XR_038724 /// XR_038758 /// XR_038877 /// XR_039697 /// XR_042313 /// XR_042380	100131565 /// 100132918 /// 1977	249718	133440	ENSG00000151247 /// ENSG00000214366	A8MX72 /// P06730 /// Q32Q75	AI742789	<a target="external" href="http://www.wikipathways.org/index.php/Pathway:Homo_sapiens:Hypertrophy_model">Hypertrophy_model</a> /// <a target="external" href="http://www.wikipathways.org/index.php/Pathway:Homo_sapiens:Translation_Factors">Translation_Factors</a>	translation /// translational initiation /// regulation of translation	RNA cap binding /// RNA binding /// translation initiation factor activity /// translation initiation factor activity /// translation initiation factor activity /// protein binding	cytoplasm /// eukaryotic translation initiation factor 4F complex	Human Genome U133 Plus 2.0 Array	Affymetrix NetAffx website
201437_s_at	EIF4E	eukaryotic translation initiation factor 4E	4q21-q25	NM_001968	1977	249718	133440	ENSG00000151247	A8MX72 /// P06730 /// Q32Q75	NM_001968	<a target="external" href="http://www.wikipathways.org/index.php/Pathway:Homo_sapiens:Hypertrophy_model">Hypertrophy_model</a> /// <a target="external" href="http://www.wikipathways.org/index.php/Pathway:Homo_sapiens:Translation_Factors">Translation_Factors</a>	translation /// translational initiation /// regulation of translation	RNA cap binding /// RNA binding /// translation initiation factor activity /// translation initiation factor activity /// translation initiation factor activity /// protein binding	cytoplasm /// eukaryotic translation initiation factor 4F complex	Human Genome U133 Plus 2.0 Array	Affymetrix NetAffx website
201438_at	COL6A3	collagen, type VI, alpha 3	2q37	NM_004369 /// NM_057164 /// NM_057165 /// NM_057166 /// NM_057167	1293	233240	120250 /// 158810 /// 254090	ENSG00000163359	A8MT30 /// P12111 /// Q53QF4 /// Q53QF6 /// Q59F25 /// Q63HQ4 /// Q6MZG6 /// Q8N4Z1	NM_004369	---	phosphate transport /// cell adhesion /// muscle development	endopeptidase inhibitor activity /// serine-type endopeptidase inhibitor activity /// structural molecule activity /// protein binding	extracellular region /// proteinaceous extracellular matrix /// collagen type VI /// cytoplasm	Human Genome U133 Plus 2.0 Array	Affymetrix NetAffx website
201444_s_at	ATP6AP2	ATPase, H+ transporting, lysosomal accessory protein 2	Xp11.4	NM_005765	10159	700634	300423 /// 300556	ENSG00000182220	O75787	NM_005765	---	angiotensin maturation /// positive regulation of transforming growth factor-beta1 production /// regulation of MAPKKK cascade	receptor activity /// protein binding	external side of plasma membrane /// membrane /// integral to membrane	Human Genome U133 Plus 2.0 Array	Affymetrix NetAffx website
201445_at	CNN3	calponin 3, acidic	1p22-p21	NM_001839	1266	706780	602374	ENSG00000117519	Q15417 /// Q6FHA7 /// Q9BWY6	NM_001839	---	smooth muscle contraction /// muscle development /// actomyosin structure organization and biogenesis	actin binding /// actin binding /// calmodulin binding /// calmodulin binding /// tropomyosin binding /// troponin C binding	---	Human Genome U133 Plus 2.0 Array	Affymetrix NetAffx website
201460_at	MAPKAPK2	mitogen-activated protein kinase-activated protein kinase 2	1q32	NM_004759 /// NM_032960	9261	706764	602006	ENSG00000162889	P49137 /// Q5SY30 /// Q5SY41	AI141802	---	MAPKKK cascade /// protein amino acid phosphorylation /// protein amino acid phosphorylation	nucleotide binding /// protein kinase activity /// protein kinase activity /// protein serine/threonine kinase activity /// protein serine/threonine kinase activity /// signal transducer activity /// protein binding /// ATP binding /// kinase activity /// transferase activity	nucleus	Human Genome U133 Plus 2.0 Array	Affymetrix NetAffx website
201461_s_at	MAPKAPK2	mitogen-activated protein kinase-activated protein kinase 2	1q32	NM_004759 /// NM_032960	9261	706764	602006	ENSG00000162889	P49137 /// Q5SY30 /// Q5SY41	NM_004759	---	MAPKKK cascade /// protein amino acid phosphorylation /// protein amino acid phosphorylation	nucleotide binding /// protein kinase activity /// protein kinase activity /// protein serine/threonine kinase activity /// protein serine/threonine kinase activity /// signal transducer activity /// protein binding /// ATP binding /// kinase activity /// transferase activity	nucleus	Human Genome U133 Plus 2.0 Array	Affymetrix NetAffx website
201462_at	SCRN1	secernin 1	7p14.3-p14.1	NM_014766	9805	520740	---	ENSG00000136193	A8K0E9 /// Q12765	NM_014766	---	proteolysis /// exocytosis /// exocytosis	dipeptidase activity	nucleus /// cytoplasm /// nuclear membrane	Human Genome U133 Plus 2.0 Array	Affymetrix NetAffx website
201465_s_at	JUN	jun oncogene	1p32-p31	NM_002228	3725	525704	165160	ENSG00000177606	P05412 /// Q6FHK0 /// Q6FHM7	BC002646	<a target="external" href="http://www.wikipathways.org/index.php/Pathway:Homo_sapiens:Apoptosis">Apoptosis</a> /// <a target="external" href="http://www.wikipathways.org/index.php/Pathway:Homo_sapiens:Apoptosis_GenMAPP">Apoptosis_GenMAPP</a> /// <a target="external" href="http://www.wikipathways.org/index.php/Pathway:Homo_sapiens:MAPK_Cascade">MAPK_Cascade</a> /// <a target="external" href="http:…	transcription /// regulation of transcription, DNA-dependent /// cellular process /// negative regulation of protein amino acid autophosphorylation /// leading edge cell differentiation /// regulation of transcription /// positive regulation of transcription from RNA polymerase II promoter	DNA binding /// DNA binding /// transcription factor activity /// transcription factor activity /// RNA polymerase II transcription factor activity /// protein binding /// sequence-specific DNA binding /// protein dimerization activity	nuclear chromosome /// nucleus /// transcription factor complex	Human Genome U133 Plus 2.0 Array	Affymetrix NetAffx website
201466_s_at	JUN	jun oncogene	1p32-p31	NM_002228	3725	525704	165160	ENSG00000177606	P05412 /// Q6FHK0 /// Q6FHM7	NM_002228	<a target="external" href="http://www.wikipathways.org/index.php/Pathway:Homo_sapiens:Apoptosis">Apoptosis</a> /// <a target="external" href="http://www.wikipathways.org/index.php/Pathway:Homo_sapiens:Apoptosis_GenMAPP">Apoptosis_GenMAPP</a> /// <a target="external" href="http://www.wikipathways.org/index.php/Pathway:Homo_sapiens:MAPK_Cascade">MAPK_Cascade</a> /// <a target="external" href="http:…	transcription /// regulation of transcription, DNA-dependent /// cellular process /// negative regulation of protein amino acid autophosphorylation /// leading edge cell differentiation /// regulation of transcription /// positive regulation of transcription from RNA polymerase II promoter	DNA binding /// DNA binding /// transcription factor activity /// transcription factor activity /// RNA polymerase II transcription factor activity /// protein binding /// sequence-specific DNA binding /// protein dimerization activity	nuclear chromosome /// nucleus /// transcription factor complex	Human Genome U133 Plus 2.0 Array	Affymetrix NetAffx website
[truncated: 8,427 more rows]
